# Supplementary material for: Thermodynamic rules for zeolite formation from machine learning based global optimization
Source: Royal Society of Chemistry journal article supplement (doi:10.1039/d0sc03918g), 2020-01-01
Supplement: d0sc03918g1.pdf [file d0sc03918g1.pdf]

## Supplementary Information

### Thermodynamic Rules for Zeolite Formation from Machine Learning based Global Optimization

Sicong Ma,<sup>a</sup> Cheng Shang,<sup>a</sup> Chuan-Ming Wang<sup>b,\*</sup> and Zhi-Pan Liu<sup>a,\*</sup>

<sup>a</sup> Collaborative Innovation Center of Chemistry for Energy Material, Shanghai Key Laboratory of Molecular Catalysis and Innovative Materials, Key Laboratory of Computational Physical Science, Department of Chemistry, Fudan University, Shanghai 200433, China

<sup>b</sup> State Key Laboratory of Green Chemical Engineering and Industrial Catalysis, Sinopec Shanghai Research Institute of Petrochemical Technology, Shanghai, 201208, China

Corresponding Author: \*wangcm.sshy@sinopec.com; \*zpliu@fudan.edu.cn

---

## Supplementary Method

### Ab-initio thermodynamics analyses

To determine the Gibbs formation energy of SiAlPOH and SiAlPONA, the *ab-initio* thermodynamics analyses have been performed where the formula (1,2) are used to compute the free energy change.

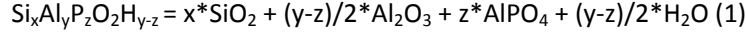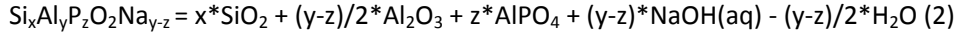

To determine the Gibbs free energy change ( $\Delta G$ ) per formula unit (f.u.) for the above reactions, one needs to compute

$$\begin{aligned} \Delta G(p,T) &= G[\text{Si}_x\text{Al}_y\text{P}_z\text{O}_2\text{H}_{y-z}](p,T) - x * G[\text{SiO}_2](p,T) - \frac{y-z}{2} * G[\text{Al}_2\text{O}_3](p,T) - z * G[\text{AlPO}_4](p,T) - \\ &\frac{y-z}{2} * \mu[\text{H}_2\text{O}](p,T) \end{aligned} \quad (3)$$

$$\begin{aligned} \Delta G(p,T) &= G[\text{Si}_x\text{Al}_y\text{P}_z\text{O}_2\text{H}_{y-z}](p,T) - x * G[\text{SiO}_2](p,T) - \frac{y-z}{2} * G[\text{Al}_2\text{O}_3](p,T) - z * G[\text{AlPO}_4](p,T) - \\ &(y-z) * G[\text{NaOH(aq)}](p,T) + \frac{y-z}{2} * \mu[\text{H}_2\text{O}](p,T) \end{aligned} \quad (4)$$

where  $G$  is the Gibbs free energy of bulks/surfaces and  $\mu$  is the chemical potential for molecules. The  $G[X]$  can be approximated by their DFT total energy  $E[X]$  with appropriate inclusion of zero-point-energy (**ZPE**), since it is known that the vibration entropy and the  $pV$  term contributions of solid phases are negligibly small. The chemical potential for molecules  $\mu[X]$  can be calculated as follows:

$$\begin{aligned} \mu[X](p,T) &= E[X] + \text{ZPE}[X] + \\ &[H[X](p^0,T) - H[X](p^0,0K) - TS[X](p^0,T) + k_B T \ln \frac{p}{p^0}] \end{aligned} \quad (5)$$

where enthalpy (**H**) and entropy (**S**) terms are taken from the standard thermodynamics data.

The chemical potential of  $G[\text{NaOH(aq)}]$  is calculated as follows.

According to formula (6,7), the chemical potential of NaOH(aq) can be written as the function of the chemical potentials of H<sub>2</sub>, H<sub>2</sub>O and Na(s), see Eq. (9).

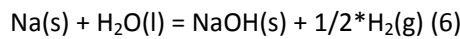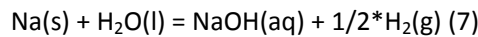

Reaction of Eq. 7 is strongly exothermic and the heat release amount is about 141 kJ/mol and more if NaOH is dissolved in excess water (188 kJ/mol, Eq. 8).<sup>1</sup>

Here we assume that the  $G[\text{NaOH(aq)}]$  at hydrothermal condition is equal to that at standard condition.

$$G[\text{NaOH(aq)}](473 \text{ K}, 15.53 \text{ bar}) = G^0[\text{NaOH(aq)}] \text{ at } 298.15 \text{ K}, 1 \text{ bar} \quad (8)$$

Therefore,

$$G^0[\text{NaOH(aq)}] = G^0[\text{Na(s)}] + \mu^0[\text{H}_2\text{O(l)}] - \frac{1}{2} * \mu^0[\text{H}_2] - 188 \quad (9)$$

---

where

$$G^{\circ}[Na(s)] = E[Na(metal)] \quad (10)$$

$$\mu^{\circ}[H_2O(l)] = \mu^{\circ}[H_2O(g)](298.15K, 0.013 \text{ bar}) \quad (11)$$

**Table S1 | Structure information in the first principles global dataset utilized in G-NN training.**

Listed data is the number of structures, as distinguished by the chemical formula, the number of atoms per supercell ( $N_{\text{atom}}$ ), the type of structures (cluster, bulk and layer). In this work we build G-NN potential mainly from bulk systems as required for zeolite PES.

| Species           | $N_{\text{atom}}$ | cluste | laye | bulk | total |
|-------------------|-------------------|--------|------|------|-------|
|                   | m                 | r      | r    |      |       |
| O16-Si8           | 24                | 0      | 4    | 731  | 735   |
| O16-Al1-Si7       | 24                | 0      | 0    | 11   | 11    |
| O16-Al2-Si5-P1    | 24                | 0      | 0    | 17   | 17    |
| O24-Si12          | 36                | 0      | 6    | 809  | 815   |
| O24-Al1-Si10-P1   | 36                | 0      | 0    | 51   | 51    |
| O24-Al1-Si11      | 36                | 0      | 0    | 6    | 6     |
| O24-Al2-Si8-P2    | 36                | 0      | 0    | 57   | 57    |
| O24-Al2-Si9-P1    | 36                | 0      | 0    | 14   | 14    |
| O24-Al3-Si6-P3    | 36                | 0      | 0    | 54   | 54    |
| O24-Al3-Si7-P2    | 36                | 0      | 0    | 10   | 10    |
| O24-Al4-Si4-P4    | 36                | 0      | 0    | 52   | 52    |
| O24-Al5-Si2-P5    | 36                | 0      | 0    | 55   | 55    |
| O24-Al6-P6        | 36                | 0      | 2    | 330  | 332   |
| O24-Al6-Si1-P5    | 36                | 0      | 1    | 10   | 11    |
| O28-Al1-Si13      | 42                | 0      | 0    | 13   | 13    |
| O28-Al2-Si11-P1   | 42                | 0      | 0    | 5    | 5     |
| O28-Al4-Si6-P4    | 42                | 0      | 0    | 223  | 223   |
| O28-Al5-Si4-P5    | 42                | 0      | 0    | 228  | 228   |
| O32-Si16          | 48                | 0      | 0    | 513  | 513   |
| O32-Al3-Si13      | 48                | 0      | 0    | 18   | 18    |
| O32-Al4-Si8-P4    | 48                | 0      | 0    | 534  | 534   |
| O32-Al5-Si6-P5    | 48                | 0      | 0    | 274  | 274   |
| O32-Al5-Si7-P4    | 48                | 0      | 0    | 12   | 12    |
| O32-Al6-Si4-P6    | 48                | 0      | 0    | 219  | 219   |
| O32-Al7-Si2-P7    | 48                | 0      | 0    | 244  | 244   |
| O32-Al8-P8        | 48                | 0      | 0    | 249  | 249   |
| O32-Al8-Si1-P7    | 48                | 0      | 0    | 11   | 11    |
| O36-Si18          | 54                | 0      | 1    | 24   | 25    |
| O40-Si20          | 60                | 0      | 0    | 328  | 328   |
| O40-Al1-Si19      | 60                | 0      | 0    | 7    | 7     |
| O40-Al2-Si17-P1   | 60                | 0      | 0    | 2    | 2     |
| O40-Al3-Si15-P2   | 60                | 0      | 0    | 12   | 12    |
| O40-Al4-Si13-P3   | 60                | 0      | 0    | 2    | 2     |
| O40-Al5-Si11-P4   | 60                | 0      | 0    | 3    | 3     |
| O48-Si24          | 72                | 1      | 0    | 93   | 94    |
| O108-Al27-Si1-P26 | 162               | 0      | 0    | 10   | 10    |
| O128-Si64         | 192               | 0      | 0    | 8    | 8     |
| O144-Si72         | 216               | 0      | 0    | 4    | 4     |

---

|                      |     |   |    |      |      |
|----------------------|-----|---|----|------|------|
| H1-O16-Al1-Si7       | 25  | 0 | 0  | 449  | 449  |
| H1-O16-Al2-Si5-P1    | 25  | 0 | 1  | 252  | 253  |
| H1-O24-Al1-Si11      | 37  | 0 | 2  | 1298 | 1300 |
| H1-O24-Al2-Si9-P1    | 37  | 0 | 0  | 702  | 702  |
| H1-O24-Al3-Si7-P2    | 37  | 0 | 0  | 924  | 924  |
| H1-O24-Al6-Si1-P5    | 37  | 0 | 10 | 356  | 366  |
| H1-O28-Al1-Si13      | 43  | 0 | 0  | 511  | 511  |
| H1-O28-Al2-Si11-P1   | 43  | 0 | 0  | 218  | 218  |
| H1-O28-Al2-Si12      | 43  | 0 | 0  | 9    | 9    |
| H1-O32-Al1-Si15      | 49  | 0 | 0  | 489  | 489  |
| H1-O32-Al2-Si13-P1   | 49  | 0 | 0  | 251  | 251  |
| H1-O32-Al3-Si11-P2   | 49  | 0 | 0  | 245  | 245  |
| H1-O32-Al4-Si9-P3    | 49  | 0 | 0  | 253  | 253  |
| H1-O32-Al5-Si7-P4    | 49  | 0 | 0  | 230  | 230  |
| H1-O32-Al6-Si6-P4    | 49  | 0 | 0  | 12   | 12   |
| H1-O32-Al8-Si1-P7    | 49  | 0 | 0  | 229  | 229  |
| H1-O32-Al8-Si2-P6    | 49  | 0 | 0  | 18   | 18   |
| H1-O36-Al1-Si17      | 55  | 0 | 0  | 21   | 21   |
| H1-O36-Al4-Si11-P3   | 55  | 0 | 0  | 28   | 28   |
| H1-O36-Al5-Si9-P4    | 55  | 0 | 1  | 25   | 26   |
| H1-O40-Al1-Si19      | 61  | 0 | 0  | 104  | 104  |
| H1-O40-Al2-Si17-P1   | 61  | 0 | 0  | 691  | 691  |
| H1-O40-Al2-Si18      | 61  | 0 | 0  | 5    | 5    |
| H1-O40-Al3-Si15-P2   | 61  | 0 | 0  | 615  | 615  |
| H1-O40-Al4-Si13-P3   | 61  | 0 | 0  | 284  | 284  |
| H1-O40-Al5-Si11-P4   | 61  | 0 | 0  | 262  | 262  |
| H1-O40-Al5-Si12-P3   | 61  | 0 | 0  | 9    | 9    |
| H1-O48-Al1-Si23      | 73  | 0 | 0  | 8    | 8    |
| H1-O96-Al1-Si47      | 145 | 0 | 0  | 44   | 44   |
| H1-O96-Al24-Si1-P23  | 145 | 0 | 0  | 76   | 76   |
| H1-O108-Al27-Si1-P26 | 163 | 0 | 0  | 127  | 127  |
| H1-O128-Al1-Si63     | 193 | 0 | 0  | 35   | 35   |
| H1-O144-Al36-Si1-P35 | 217 | 0 | 0  | 72   | 72   |
| H1-O160-Al40-Si1-P39 | 241 | 0 | 0  | 59   | 59   |
| H1-O216-Al54-Si1-P53 | 325 | 0 | 0  | 10   | 10   |
| H2-O24-Al2-Si10      | 38  | 0 | 3  | 1304 | 1307 |
| H2-O24-Al3-Si8-P1    | 38  | 0 | 0  | 466  | 466  |
| H2-O24-Al4-Si6-P2    | 38  | 0 | 0  | 218  | 218  |
| H2-O24-Al5-Si4-P3    | 38  | 0 | 0  | 235  | 235  |
| H2-O24-Al6-Si1-P5    | 38  | 0 | 0  | 30   | 30   |
| H2-O24-Al6-Si2-P4    | 38  | 0 | 1  | 513  | 514  |
| H2-O24-Al8-P4        | 38  | 0 | 0  | 11   | 11   |
| H2-O28-Al1-Si13      | 44  | 0 | 0  | 32   | 32   |
| H2-O28-Al2-Si12      | 44  | 0 | 0  | 490  | 490  |

---

|                      |     |   |   |      |      |
|----------------------|-----|---|---|------|------|
| H2-O32-AI2-Si14      | 50  | 0 | 0 | 272  | 272  |
| H2-O32-AI3-Si12-P1   | 50  | 0 | 0 | 492  | 492  |
| H2-O32-AI3-Si13      | 50  | 0 | 0 | 17   | 17   |
| H2-O32-AI6-Si6-P4    | 50  | 0 | 0 | 254  | 254  |
| H2-O32-AI7-Si5-P4    | 50  | 0 | 0 | 8    | 8    |
| H2-O32-AI8-Si2-P6    | 50  | 0 | 0 | 219  | 219  |
| H2-O32-AI8-Si3-P5    | 50  | 0 | 0 | 6    | 6    |
| H2-O32-AI8-Si4-P4    | 50  | 0 | 0 | 17   | 17   |
| H2-O36-AI2-Si16      | 56  | 0 | 0 | 32   | 32   |
| H2-O36-AI4-Si12-P2   | 56  | 0 | 0 | 30   | 30   |
| H2-O40-AI2-Si18      | 62  | 0 | 0 | 289  | 289  |
| H2-O40-AI5-Si12-P3   | 62  | 0 | 0 | 263  | 263  |
| H2-O40-AI5-Si13-P2   | 62  | 0 | 0 | 14   | 14   |
| H2-O48-AI5-Si19      | 74  | 0 | 0 | 6    | 6    |
| H2-O96-AI2-Si46      | 146 | 0 | 0 | 41   | 41   |
| H2-O96-AI12-Si26-P10 | 146 | 0 | 0 | 40   | 40   |
| H3-O24-AI3-Si9       | 39  | 0 | 1 | 1003 | 1004 |
| H3-O24-AI4-Si7-P1    | 39  | 0 | 0 | 234  | 234  |
| H3-O24-AI6-Si3-P3    | 39  | 0 | 1 | 286  | 287  |
| H3-O28-AI3-Si11      | 45  | 0 | 0 | 238  | 238  |
| H3-O28-AI4-Si9-P1    | 45  | 0 | 0 | 229  | 229  |
| H3-O32-AI3-Si13      | 51  | 0 | 0 | 545  | 545  |
| H3-O32-AI7-Si5-P4    | 51  | 0 | 0 | 238  | 238  |
| H3-O32-AI8-Si3-P5    | 51  | 0 | 0 | 223  | 223  |
| H3-O32-AI8-Si4-P4    | 51  | 0 | 0 | 18   | 18   |
| H3-O36-AI3-Si15      | 57  | 0 | 0 | 52   | 52   |
| H3-O36-AI4-Si13-P1   | 57  | 0 | 0 | 27   | 27   |
| H3-O36-AI5-Si11-P2   | 57  | 0 | 0 | 21   | 21   |
| H3-O40-AI5-Si13-P2   | 63  | 0 | 0 | 246  | 246  |
| H3-O40-AI5-Si14-P1   | 63  | 0 | 0 | 4    | 4    |
| H3-O48-AI5-Si19      | 75  | 0 | 0 | 14   | 14   |
| H3-O96-AI3-Si45      | 147 | 0 | 0 | 49   | 49   |
| H4-O24-AI4-Si8       | 40  | 0 | 1 | 615  | 616  |
| H4-O24-AI6-Si4-P2    | 40  | 0 | 2 | 58   | 60   |
| H4-O24-AI10-P2       | 40  | 0 | 0 | 11   | 11   |
| H4-O28-AI4-Si10      | 46  | 0 | 0 | 250  | 250  |
| H4-O32-AI8-Si4-P4    | 52  | 0 | 0 | 299  | 299  |
| H4-O36-AI4-Si14      | 58  | 0 | 0 | 30   | 30   |
| H4-O40-AI5-Si14-P1   | 64  | 0 | 0 | 256  | 256  |
| H4-O48-AI5-Si19      | 76  | 0 | 0 | 3    | 3    |
| H4-O96-AI4-Si44      | 148 | 0 | 0 | 115  | 115  |
| H5-O24-AI5-Si7       | 41  | 0 | 0 | 56   | 56   |
| H5-O24-AI6-Si5-P1    | 41  | 0 | 0 | 61   | 61   |
| H5-O24-AI11-P1       | 41  | 0 | 0 | 10   | 10   |

|                      |     |   |    |       |       |
|----------------------|-----|---|----|-------|-------|
| H5-O48-Al5-Si19      | 77  | 0 | 0  | 17    | 17    |
| H5-O96-Al5-Si43      | 149 | 0 | 0  | 215   | 215   |
| H6-O24-Al6-Si6       | 42  | 0 | 1  | 108   | 109   |
| H6-O96-Al6-Si42      | 150 | 0 | 0  | 31    | 31    |
| H7-O96-Al7-Si41      | 151 | 0 | 0  | 207   | 207   |
| H8-O24-Al8-Si4       | 44  | 0 | 0  | 68    | 68    |
| H8-O96-Al8-Si40      | 152 | 0 | 0  | 167   | 167   |
| H9-O96-Al9-Si39      | 153 | 0 | 0  | 236   | 236   |
| H10-O24-Al10-Si2     | 46  | 0 | 0  | 68    | 68    |
| H10-O96-Al10-Si38    | 154 | 0 | 0  | 176   | 176   |
| H10-O96-Al16-Si26-P6 | 154 | 0 | 0  | 39    | 39    |
| H11-O96-Al11-Si37    | 155 | 0 | 0  | 130   | 130   |
| H12-O24-Al12         | 48  | 0 | 0  | 59    | 59    |
| H12-O96-Al12-Si36    | 156 | 0 | 0  | 98    | 98    |
| H14-O96-Al14-Si34    | 158 | 0 | 0  | 100   | 100   |
| H16-O96-Al16-Si32    | 160 | 0 | 0  | 158   | 158   |
| H16-O96-Al20-Si24-P4 | 160 | 0 | 0  | 82    | 82    |
| H16-O96-Al32-P16     | 160 | 0 | 0  | 36    | 36    |
| H18-O96-Al18-Si30    | 162 | 0 | 0  | 61    | 61    |
| H19-O96-Al19-Si29    | 163 | 0 | 0  | 69    | 69    |
| H22-O96-Al22-Si26    | 166 | 0 | 0  | 122   | 122   |
| H23-O96-Al23-Si25    | 167 | 0 | 0  | 54    | 54    |
| H27-O96-Al27-Si21    | 171 | 0 | 0  | 47    | 47    |
| H29-O96-Al29-Si19    | 173 | 0 | 0  | 42    | 42    |
| H34-O96-Al34-Si14    | 178 | 0 | 0  | 52    | 52    |
| total                | --  | 1 | 38 | 27096 | 27135 |

**Table S2 | Benchmark of G-NN calculations as compared with DFT results for low energy zeolites encountered in this work.** Listed data include the compositions, total atom number per cell ( $N_{\text{atom}}$ ), DFT energy, NN energy and energy differences between DFT energy and NN energy ( $\Delta E$ , meV/atom).

| ID | Composition   | $E_{\text{DFT}}$ (eV) | $E_{\text{NN}}$ (eV) | $N_{\text{Atom}}$ | $\Delta E$<br>(eV/f.u.) |
|----|---------------|-----------------------|----------------------|-------------------|-------------------------|
| 1  | P1Si10Al1O24  | -247.36               | -247.418             | 36                | 0.005                   |
| 2  | P1Si10Al1O24  | -246.007              | -245.976             | 36                | -0.003                  |
| 3  | P1Si5Al6O24H5 | -256.338              | -256.19              | 41                | -0.012                  |
| 4  | P1Si5Al6O24H5 | -257.949              | -257.969             | 41                | 0.002                   |
| 5  | P1Si6Al5O24H4 | -254.112              | -254.059             | 40                | -0.004                  |
| 6  | P1Si6Al5O24H4 | -255.558              | -255.47              | 40                | -0.007                  |
| 7  | P1Si7Al4O24H3 | -253.926              | -253.911             | 39                | -0.001                  |
| 8  | P1Si7Al4O24H3 | -251.782              | -251.627             | 39                | -0.013                  |
| 9  | P1Si8Al3O24H2 | -249.616              | -249.453             | 38                | -0.014                  |
| 10 | P1Si8Al3O24H2 | -251.433              | -251.285             | 38                | -0.012                  |
| 11 | P1Si9Al2O24H1 | -249.537              | -249.574             | 37                | 0.003                   |

---

|    |               |          |          |    |        |
|----|---------------|----------|----------|----|--------|
| 12 | P1Si9Al2O24H1 | -248.026 | -247.992 | 37 | -0.003 |
| 13 | P2Si4Al6O24H4 | -251.643 | -251.644 | 40 | 0.000  |
| 14 | P2Si4Al6O24H4 | -253.244 | -253.136 | 40 | -0.009 |
| 15 | P2Si5Al5O24H3 | -249.446 | -249.468 | 39 | 0.002  |
| 16 | P2Si5Al5O24H3 | -250.793 | -250.644 | 39 | -0.012 |
| 17 | P2Si6Al4O24H2 | -248.61  | -248.503 | 38 | -0.009 |
| 18 | P2Si6Al4O24H2 | -247.356 | -247.356 | 38 | 0.000  |
| 19 | P2Si7Al3O24H1 | -245.349 | -245.261 | 37 | -0.007 |
| 20 | P2Si7Al3O24H1 | -246.463 | -246.372 | 37 | -0.008 |
| 21 | P2Si8Al2O24   | -244.75  | -244.879 | 36 | 0.011  |
| 22 | P2Si8Al2O24   | -243.401 | -243.362 | 36 | -0.003 |
| 23 | P3Si3Al6O24H3 | -247.39  | -247.332 | 39 | -0.005 |
| 24 | P3Si3Al6O24H3 | -248.398 | -248.142 | 39 | -0.021 |
| 25 | P3Si4Al5O24H2 | -245.821 | -245.735 | 38 | -0.007 |
| 26 | P3Si4Al5O24H2 | -244.699 | -244.73  | 38 | 0.003  |
| 27 | P3Si5Al4O24H1 | -242.761 | -242.859 | 37 | 0.008  |
| 28 | P3Si5Al4O24H1 | -244.249 | -244.348 | 37 | 0.008  |
| 29 | P3Si6Al3O24   | -240.163 | -240.181 | 36 | 0.002  |
| 30 | P3Si6Al3O24   | -242.065 | -242.084 | 36 | 0.002  |
| 31 | P4Si2Al6O24H2 | -244.234 | -244.106 | 38 | -0.011 |
| 32 | P4Si2Al6O24H2 | -242.956 | -242.92  | 38 | -0.003 |
| 33 | P4Si3Al5O24H1 | -240.282 | -240.269 | 37 | -0.001 |
| 34 | P4Si3Al5O24H1 | -241.489 | -241.517 | 37 | 0.002  |
| 35 | P4Si4Al4O24   | -238.105 | -238.156 | 36 | 0.004  |
| 36 | P4Si4Al4O24   | -239.792 | -239.844 | 36 | 0.004  |
| 37 | P5Si1Al6O24H1 | -239.632 | -239.55  | 37 | -0.007 |
| 38 | P5Si1Al6O24H1 | -238.349 | -238.228 | 37 | -0.010 |
| 39 | P5Si2Al5O24   | -235.478 | -235.45  | 36 | -0.002 |
| 40 | P5Si2Al5O24   | -237.169 | -237.205 | 36 | 0.003  |
| 41 | P6Al6O24      | -234.98  | -234.939 | 36 | -0.003 |
| 42 | P6Al6O24      | -233.967 | -234.034 | 36 | 0.006  |
| 43 | P6Al6O24      | -234.547 | -234.566 | 36 | 0.002  |
| 44 | P6Al6O24      | -233.944 | -233.949 | 36 | 0.000  |
| 45 | P6Al6O24      | -233.944 | -233.953 | 36 | 0.001  |
| 46 | P6Al6O24      | -233.935 | -233.928 | 36 | -0.001 |
| 47 | P6Al6O24      | -235.321 | -235.319 | 36 | 0.000  |
| 48 | Si10Al2O24H2  | -253.189 | -253.2   | 38 | 0.001  |
| 49 | Si10Al2O24H2  | -254.846 | -254.839 | 38 | -0.001 |
| 50 | Si11Al1O24H1  | -251.361 | -251.417 | 37 | 0.005  |
| 51 | Si11Al1O24H1  | -252.966 | -252.914 | 37 | -0.004 |
| 52 | Si12O24       | -250.304 | -250.357 | 36 | 0.004  |
| 53 | Si12O24       | -249.821 | -249.835 | 36 | 0.001  |
| 54 | Si12O24       | -250.581 | -250.498 | 36 | -0.007 |
| 55 | Si12O24       | -248.753 | -248.908 | 36 | 0.013  |



|                        |             |          |          |    |        |
|------------------------|-------------|----------|----------|----|--------|
| 56                     | Si12O24     | -249.812 | -249.854 | 36 | 0.004  |
| 57                     | Si12O24     | -251.147 | -251.092 | 36 | -0.005 |
| 58                     | Si12O24     | -250.192 | -250.222 | 36 | 0.003  |
| 59                     | Si6Al6O24H6 | -262.448 | -262.354 | 42 | -0.008 |
| 60                     | Si6Al6O24H6 | -257.613 | -257.483 | 42 | -0.011 |
| 61                     | Si6Al6O24H6 | -262.64  | -262.576 | 42 | -0.005 |
| 62                     | Si6Al6O24H6 | -262.774 | -262.607 | 42 | -0.014 |
| 63                     | Si6Al6O24H6 | -260.934 | -260.865 | 42 | -0.006 |
| 64                     | Si6Al6O24H6 | -260.523 | -260.317 | 42 | -0.017 |
| 65                     | Si6Al6O24H6 | -261.586 | -261.485 | 42 | -0.008 |
| 66                     | Si6Al6O24H6 | -261.916 | -261.922 | 42 | 0.001  |
| 67                     | Si7Al5O24H5 | -260.504 | -260.403 | 41 | -0.008 |
| 68                     | Si7Al5O24H5 | -259.323 | -259.275 | 41 | -0.004 |
| 69                     | Si8Al4O24H4 | -257.348 | -257.173 | 40 | -0.015 |
| 70                     | Si8Al4O24H4 | -258.439 | -258.441 | 40 | 0.000  |
| 71                     | Si9Al3O24H3 | -256.46  | -256.407 | 39 | -0.004 |
| 72                     | Si9Al3O24H3 | -255.345 | -255.303 | 39 | -0.004 |
| Root mean square error |             |          |          |    | 0.007  |
| r                      |             |          |          |    |        |

**Table S3 | Benchmark of G-NN and DFT formation Gibbs free energy ( $G_f$ ) of CHA-type  $\text{Si}_x\text{Al}_y\text{P}_z\text{O}_2\text{H}_{y-z}$  ( $x + y + z = 1$ ) compositions.**  $G_f$  is the free energy of zeolite (without rigid body) relative to the free energies of quartz- $\text{SiO}_2$ , quartz- $\text{AlPO}$ ,  $\alpha\text{-Al}_2\text{O}_3$  solids and  $\text{H}_2\text{O}$  at 200 °C and 15.53 bar. Also see Figure 2 for details.

| Composition | DFT $G_f$<br>(eV/f.u.) | NN $G_f$<br>(eV/f.u.) | $\Delta E$ (eV/f.u.)<br>( ) |
|-------------|------------------------|-----------------------|-----------------------------|
| Si0Al6P6H0  | 0.114                  | 0.113                 | 0.001                       |
| Si10Al1P1H0 | 0.200                  | 0.199                 | 0.001                       |
| Si10Al2P0H2 | 0.182                  | 0.171                 | 0.011                       |
| Si11Al1P0H1 | 0.169                  | 0.161                 | 0.008                       |
| Si12Al0P0H0 | 0.110                  | 0.105                 | 0.005                       |
| Si1Al6P5H1  | 0.155                  | 0.162                 | -0.007                      |
| Si2Al5P5H0  | 0.203                  | 0.200                 | 0.003                       |
| Si2Al6P4H2  | 0.178                  | 0.177                 | 0.001                       |
| Si3Al5P4H1  | 0.203                  | 0.189                 | 0.014                       |
| Si3Al6P3H3  | 0.216                  | 0.217                 | -0.001                      |
| Si4Al4P4H0  | 0.207                  | 0.200                 | 0.007                       |
| Si4Al5P3H2  | 0.231                  | 0.227                 | 0.004                       |
| Si4Al6P2H4  | 0.240                  | 0.239                 | 0.001                       |
| Si5Al4P3H1  | 0.226                  | 0.215                 | 0.011                       |
| Si5Al5P2H3  | 0.232                  | 0.235                 | -0.003                      |
| Si5Al6P1H5  | 0.276                  | 0.271                 | 0.005                       |
| Si6Al3P3H0  | 0.247                  | 0.246                 | 0.001                       |
| Si6Al4P2H2  | 0.231                  | 0.220                 | 0.011                       |

|                        |       |       |        |
|------------------------|-------|-------|--------|
| Si6Al5P1H4             | 0.231 | 0.234 | -0.003 |
| Si6Al6P0H6             | 0.304 | 0.296 | 0.008  |
| Si7Al3P2H1             | 0.231 | 0.234 | -0.003 |
| Si7Al4P1H3             | 0.286 | 0.288 | -0.002 |
| Si7Al5P0H5             | 0.256 | 0.253 | 0.003  |
| Si8Al2P2H0             | 0.206 | 0.207 | -0.001 |
| Si8Al3P1H2             | 0.269 | 0.271 | -0.002 |
| Si8Al4P0H4             | 0.233 | 0.241 | -0.008 |
| Si9Al2P1H1             | 0.205 | 0.198 | 0.007  |
| Si9Al3P0H3             | 0.212 | 0.210 | 0.002  |
| Root mean square error | --    | --    | 0.005  |

**Table S4. The energy difference between G-NN and DFT calculations for 30 different zeolite structures with AlPO and SiO<sub>2</sub> compositions.\***

|      | $\Delta E(\text{eV/f.u.})$ | $\Delta E(\text{eV/f.u.})$ |        | $\Delta E(\text{eV/f.u.})$ | $\Delta E(\text{eV/f.u.})$ |        | $\Delta E(\text{eV/f.u.})$ | $\Delta E(\text{eV/f.u.})$ |        |        |        |
|------|----------------------------|----------------------------|--------|----------------------------|----------------------------|--------|----------------------------|----------------------------|--------|--------|--------|
| name | )                          | )                          | name   | )                          | )                          | name   | )                          | )                          |        |        |        |
|      | of AlPO                    | SiO <sub>2</sub>           |        | AlPO                       | SiO <sub>2</sub>           |        | AlPO                       | SiO <sub>2</sub>           |        |        |        |
| 1    | ACO                        | -0.002                     | 0.006  | 11                         | AVE                        | 0.001  | -0.003                     | 21                         | GME    | -0.001 | 0.008  |
| 2    | AEI                        | 0.002                      | 0.008  | 12                         | AWO                        | -0.001 | 0.000                      | 22                         | MVY    | 0.011  | 0.009  |
| 3    | AFG                        | 0.002                      | -0.010 | 13                         | CGS                        | 0.003  | 0.007                      | 23                         | PON    | 0.003  | 0.005  |
| 4    | AFI                        | 0.003                      | 0.008  | 14                         | CHA                        | 0.001  | 0.006                      | 24                         | quartz | -0.003 | 0.006  |
| 5    | AFN                        | 0.000                      | -0.007 | 15                         | CZP                        | 0.010  | 0.016                      | 25                         | RHO    | 0.005  | 0.009  |
| 6    | AHT                        | 0.003                      | 0.002  | 16                         | DL                         | -0.003 | 0.010                      | 26                         | SAF    | 0.003  | 0.006  |
| 7    | ATN                        | -0.003                     | -0.010 | 17                         | EAB                        | 0.002  | 0.003                      | 27                         | SAT    | 0.002  | -0.003 |
| 8    | ATO                        | 0.000                      | -0.012 | 18                         | ERI                        | 0.000  | -0.001                     | 28                         | SAV    | 0.003  | 0.008  |
| 9    | ATS                        | -0.004                     | -0.003 | 19                         | EZT                        | 0.001  | -0.002                     | 29                         | TOL    | 0.000  | -0.011 |
| 10   | ATV                        | 0.000                      | 0.002  | 20                         | FAU                        | 0.006  | 0.014                      | 30                         | VFI    | 0.001  | 0.002  |

\*The root mean square errors are 0.003 and 0.007 eV/f.u. for AlPO and SiO<sub>2</sub>, respectively.

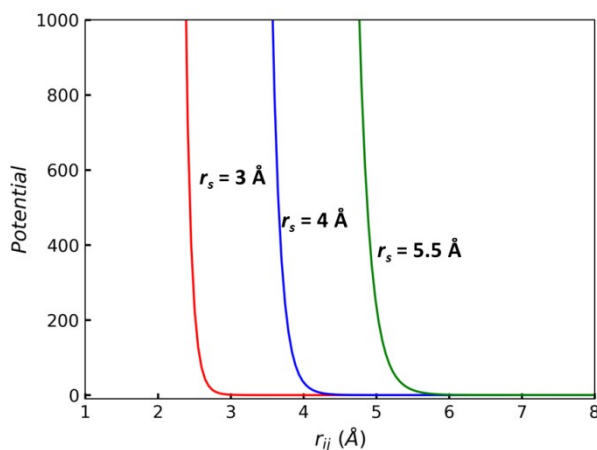

**Figure S1 | The power-type repulsive potential profile with different  $r_s$ .**

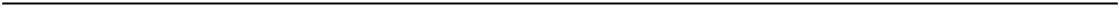

---

## Supplementary Note 1

All experiment results in Table S5, S6, S7 and S10 are collected from the IZC-SC bank,<sup>2</sup> which are related to the as-synthesized AIPO, SiO<sub>2</sub>, SAPO and aluminosilicate zeolites, respectively. By using G-NN calculations, we can facilely optimize and compute the energy of these known framework for AIPO and SiO<sub>2</sub> zeolites.

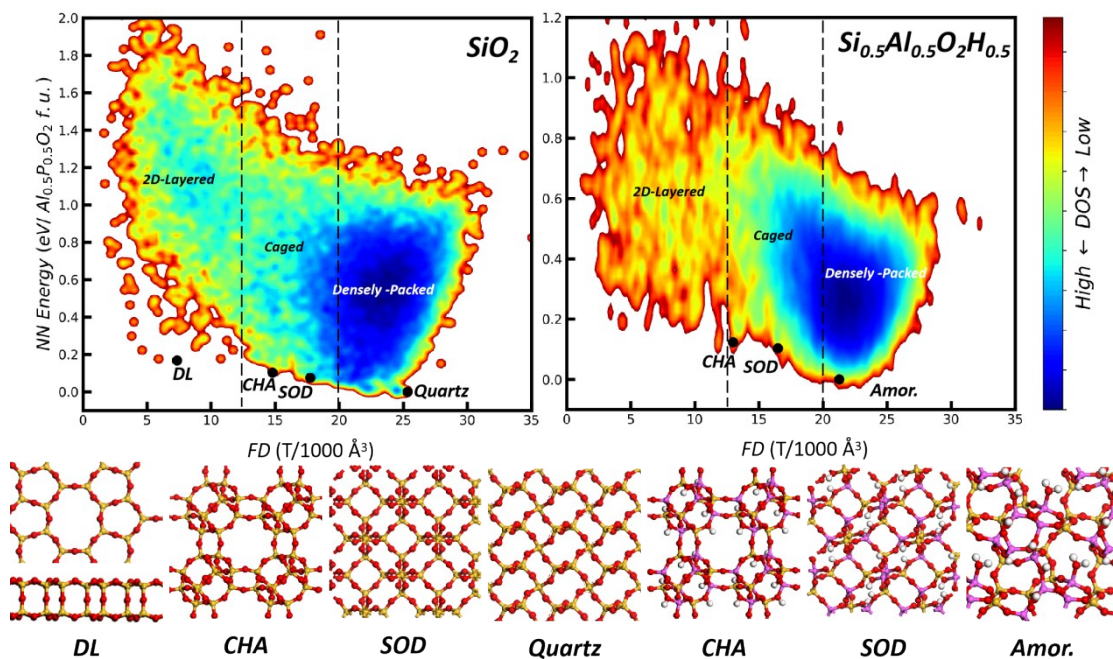

**Figure S2 | Global PES contour plots for  $\text{SiO}_2$  and  $\text{Si}_{0.5}\text{Al}_{0.5}\text{O}_2\text{H}_{0.5}$  minima as determined from E-SSW-NN global.** Each plot contains more than 25,000 minima. The **x** axis is the framework density (FD) of structure, and the **y** axis is the relative G-NN energy of minima (GM is set as energy zero). For the structure snapshots, the yellow, pink, red and white balls represent the Si, Al, O and H atoms, respectively.

**Table S5 | The G-NN energies, FD values and  $n_T$  of 66 zeolites from 252 zeolite bank.** 63 of them are predicted to be possible for AIPO zeolite. Others (186=252-66) do not satisfy the bonding pattern rules, e.g. no P-O-P or Al-O-Al bonding patterns. 29 kinds of AIPO zeolites have been synthesized in experiment as indicated by the reference.

|    | name          | energ    | FD           | $n_T$     | material | reference                                       |
|----|---------------|----------|--------------|-----------|----------|-------------------------------------------------|
|    | <b>quartz</b> | <b>0</b> | <b>24.57</b> | <b>12</b> |          |                                                 |
| 1  | PSI           | 0.046    | 19.16        | 72        | *PST-6   | Angew. Chem. Int. Ed., 53, 7480-7483 (2014)     |
| 2  | SAF           | 0.053    | 17.83        | 32        | *STA-15  | Chem. Mater., 22, 338-346 (2010)                |
| 3  | AFO           | 0.054    | 18.12        | 20        | AIPO-41  | Zeolites, 14, 523-528 (1994)                    |
| 4  | AEL           | 0.06     | 18.11        | 20        | AIPO-11  | Zeolites, 7, 160-162 (1987)                     |
| 5  | ATO           | 0.062    | 17.73        | 12        | AIPO-31  | Zeolites, 12, 338-342 (1992)                    |
| 6  | ATV           | 0.071    | 18.03        | 12        | AIPO-25  | J. Phys. Chem., 94, 3365-3367 (1990)            |
| 7  | AFI           | 0.072    | 16.02        | 24        | AIPO-5   | ACS Sym. Ser., 218, 109-118 (1983)              |
| 8  | IFO           | 0.077    | 16.13        | 32        | *ITQ-51  | Proc. Natl. Acad. Sci., 110, 3749-3754 (2013)   |
| 9  | OSI           | 0.077    | 16.72        | 16        | *UiO-6   | Chem. Commun., , 1553-1554 (1996)               |
| 10 | ATN           | 0.079    | 16.9         | 8         | SAPO-39  | Zeolites, 18, 350-355 (1997)                    |
| 11 | AET           | 0.083    | 16.72        | 36        | AIPO-8   | Zeolites, 10, 522-524 (1990)                    |
| 12 | FRA           | 0.084    | 16.29        | 60        |          |                                                 |
| 13 | AWO           | 0.085    | 17.28        | 24        | AIPO-21  | Inorg. Chem., 24, 188-193 (1985)                |
| 14 | FAR           | 0.086    | 16.07        | 84        |          |                                                 |
| 15 | GIU           | 0.086    | 16.19        | 96        |          |                                                 |
| 16 | LTN           | 0.086    | 15.81        | 192       |          |                                                 |
| 17 | AFG           | 0.087    | 16.09        | 48        |          |                                                 |
| 18 | JSW           | 0.087    | 17.45        | 48        |          |                                                 |
| 19 | MAR           | 0.087    | 16.05        | 72        |          |                                                 |
| 20 | CAN           | 0.088    | 15.95        | 12        |          |                                                 |
| 21 | ATS           | 0.089    | 15.24        | 12        | AIPO-36  | Microporous Mesoporous Mat., 32, 241-250 (1999) |
| 22 | LIO           | 0.089    | 15.99        | 36        |          |                                                 |
| 23 | MVY           | 0.089    | 19.62        | 12        |          |                                                 |
| 24 | SAT           | 0.089    | 15.59        | 24        |          |                                                 |
| 25 | TOL           | 0.089    | 16.07        | 72        |          |                                                 |
| 26 | AST           | 0.091    | 15.04        | 10        | AIPO-16  | Zeolites, 11, 502-506 (1991)                    |
| 27 | AVE           | 0.091    | 15.6         | 48        | AIPO-78  | Chem. Mater., 30, 582-586 (2018)                |
| 28 | EZT           | 0.092    | 16.21        | 24        | *EMM-3   | Chem. Mater., 18, 1697-1704 (2006)              |
| 29 | PON           | 0.092    | 17.1         | 24        | *IST-1   | Microporous Mesoporous Mat., 65, 43-57 (2003)   |
| 30 | LOS           | 0.092    | 16.02        | 24        |          |                                                 |
| 31 | ERI           | 0.097    | 15.14        | 36        | AIPO-17  | Acta Crystallogr., C42, 283-286 (1986)          |
| 32 | EAB           | 0.097    | 15.11        | 36        |          |                                                 |
| 33 | SWY           | 0.098    | 15.14        | 72        | *STA-20  | Chem. Mater., 29, 2180-2190 (2017)              |
| 34 | ANA           | 0.098    | 18.26        | 24        | AIPO-24  | J. Am. Chem. Soc., 104, 1146-1147 (1982)        |
| 35 | LTJ           | 0.099    | 17.67        | 16        |          |                                                 |

---

|    |            |              |              |           |         |                                                 |
|----|------------|--------------|--------------|-----------|---------|-------------------------------------------------|
| 36 | PHI        | 0.102        | 15.53        | 16        |         |                                                 |
| 37 | AEI        | 0.103        | 14.25        | 24        | AIPO-18 | Zeolites, 11, 654-661 (1991)                    |
| 38 | CHA        | 0.103        | 14.26        | 12        | AIPO-34 | Acta Crystallogr., C50, 852-854 (1994)          |
| 39 | GIS        | 0.103        | 15.56        | 8         | AIPO-43 | Chem. Commun., , 1293-1294 (1996)               |
| 40 | SIV        | 0.103        | 15.54        | 32        |         |                                                 |
| 41 | AFT        | 0.104        | 14.28        | 72        | AIPO-52 | Zeolites, 15, 460-469 (1995)                    |
| 42 | AFX        | 0.104        | 14.26        | 48        |         |                                                 |
| 43 | GME        | 0.105        | 14.25        | 24        |         |                                                 |
| 44 | MWF        | 0.105        | 15.23        | 720       |         |                                                 |
| 45 | SAV        | 0.105        | 14.26        | 48        |         |                                                 |
| 46 | SFW        | 0.105        | 14.28        | 36        |         |                                                 |
| 47 | PAU        | 0.106        | 15.09        | 336       |         |                                                 |
| 48 | PWN        | 0.106        | 14.78        | 120       |         |                                                 |
| 49 | FAU        | 0.107        | 12.51        | 48        | AIPO-37 | J. Am. Chem. Soc., 106, 6092-6093 (1984)        |
| 50 | CGS        | 0.107        | 15.94        | 32        |         |                                                 |
| 51 | JNT        | 0.107        | 18.89        | 32        |         |                                                 |
| 52 | TSC        | 0.107        | 12.46        | 96        |         |                                                 |
| 53 | AFN        | 0.108        | 16.74        | 16        | AIPO-14 | Microporous Mesoporous Mat., 57, 211-214 (2003) |
| 54 | RHO        | 0.109        | 13.62        | 24        |         |                                                 |
| 55 | SBT        | 0.109        | 12.92        | 48        |         |                                                 |
| 56 | SBS        | 0.11         | 12.92        | 96        |         |                                                 |
| 57 | AFS        | 0.111        | 13.71        | 56        |         |                                                 |
| 58 | BPH        | 0.111        | 13.72        | 28        |         |                                                 |
| 59 | ETR        | 0.114        | 14.54        | 48        |         |                                                 |
| 60 | POR        | 0.116        | 16.46        | 64        | *PST-14 | Angew. Chem. Int. Ed., 57, 3727-3732 (2018)     |
| 61 | ACO        | 0.117        | 15.6         | 8         |         |                                                 |
| 62 | AHT        | 0.134        | 17.39        | 12        | AIPO-H2 | Solid State Nucl. Mag. Res., 4, 173-178 (1995)  |
| 63 | VFI        | 0.138        | 13.31        | 36        | *VPI-5  | Nature, 331, 698-699 (1988)                     |
|    | <b>DL</b>  | <b>0.166</b> | <b>5.71</b>  | <b>12</b> |         |                                                 |
| 64 | <b>AFY</b> | <b>0.17</b>  | <b>13.15</b> | <b>16</b> |         | <b>Only observed in CoAlPO material</b>         |
| 65 | <b>BSV</b> | <b>0.187</b> | <b>17.2</b>  | <b>48</b> |         | <b>Only observed in GaGeO material</b>          |
| 66 | <b>CZP</b> | <b>0.198</b> | <b>18.75</b> | <b>24</b> |         | <b>Only observed in ZnPO material</b>           |

---

**Table S6 | The G-NN energies, FD values and  $n_T$  of 233 zeolites from 252 zeolite bank. 225 of them are predicted to be possible for SiO<sub>2</sub> composition. Others (19=252-233) do not satisfy the Si:O ratio of 1:2. 60 kinds of pure silica zeolites have been synthesized in experiment as indicated by the reference.**

|    | name   | energ<br>y | FD    | Tatom<br>s | material              | reference                                   |
|----|--------|------------|-------|------------|-----------------------|---------------------------------------------|
|    | quartz | 0.000      | 22.85 | 12         |                       |                                             |
| 1  | VET    | 0.043      | 19.41 | 17         | *VPI-8                | J. Am. Chem. Soc., 118, 7299-7310 (1996)    |
| 2  | PSI    | 0.045      | 19.83 | 72         |                       |                                             |
| 3  | MRE    | 0.049      | 19.03 | 24         | *ZSM-48               | Zeolites, 5, 355-358 (1985)                 |
| 4  | MTF    | 0.050      | 19.67 | 22         | *MCM-35               | Chem. Mater., 11, 2919-2927 (1999)          |
| 5  | GON    | 0.052      | 18.80 | 16         | *GUS-1                | Chem. Commun., , 2363-2364 (2000)           |
| 6  | STO    | 0.054      | 18.10 | 112        | *SSZ-31 polymorph     | J. Phys. Chem. B, 107, 10983-10989 (2003)   |
| 7  | AFO    | 0.054      | 18.84 | 20         |                       |                                             |
| 8  | SAF    | 0.056      | 18.49 | 32         |                       |                                             |
| 9  | AEL    | 0.059      | 18.72 | 20         |                       |                                             |
| 10 | MSO    | 0.063      | 17.64 | 30         |                       |                                             |
| 11 | PCR    | 0.067      | 18.48 | 30         | *IPC-4                | Nature Chemistry, , 628-633 (2013)          |
| 12 | IHW    | 0.069      | 18.07 | 56         | *ITQ-32               | J. Am. Chem. Soc., 127, 11560-11561 (2005)  |
| 13 | SFG    | 0.070      | 17.25 | 74         |                       |                                             |
| 14 | SFV    | 0.070      | 16.97 | 784        | *SSZ-57               | Science, 333, 1134-1137 (2011)              |
| 15 | MEL    | 0.070      | 16.99 | 48         |                       |                                             |
| 16 | MFI    | 0.071      | 17.32 | 96         | Silicalite            | Nature, 271, 512-516 (1978)                 |
| 17 | DON    | 0.071      | 16.64 | 32         | UTD-1                 | J. Am. Chem. Soc., 119, 8474-8484 (1997)    |
| 18 | TER    | 0.072      | 16.83 | 40         |                       |                                             |
| 19 | MTT    | 0.072      | 17.98 | 24         |                       |                                             |
| 20 | TON    | 0.073      | 17.92 | 12         | ZSM-22                | Zeolites, 5, 349-351 (1985)                 |
| 21 | AFI    | 0.073      | 16.62 | 24         | SSZ-24                | Zeolites, 11, 438-442 (1991)                |
| 22 | DDR    | 0.074      | 17.11 | 40         | *Deca-dodecasil<br>3R | Z. Kristallogr., 175, 93-104 (1986)         |
| 23 | TUN    | 0.074      | 17.03 | 96         |                       |                                             |
| 24 | ATV    | 0.074      | 18.68 | 12         |                       |                                             |
| 25 | IMF    | 0.074      | 17.08 | 144        | *IM-5                 | Science, 315, 1113-1116 (2007)              |
| 26 | SVV    | 0.075      | 17.24 | 28         |                       |                                             |
| 27 | RUT    | 0.076      | 17.40 | 18         | TMA- [Si-O]-RUT       | J. Phys. Chem. Solids, 56, 1363-1368 (1995) |
| 28 | SGT    | 0.076      | 17.09 | 32         | *Sigma-2              | J. Appl. Crystallogr., 21, 305-310 (1988)   |
| 29 | JBW    | 0.076      | 18.53 | 6          |                       |                                             |
| 30 | ITR    | 0.076      | 16.82 | 56         |                       |                                             |
| 31 | JRY    | 0.076      | 18.17 | 12         |                       |                                             |
| 32 | ITH    | 0.076      | 16.89 | 28         | *ITQ-13               | Angew. Chem. Int. Ed., 42, 1156-1159 (2003) |
| 33 | SFS    | 0.076      | 16.19 | 56         |                       |                                             |
| 34 | MEP    | 0.077      | 17.68 | 46         | *Melanophlogite       | Z. Kristallogr., 164, 247-257 (1983)        |
| 35 | BOF    | 0.077      | 17.76 | 24         |                       |                                             |
| 36 | SSF    | 0.078      | 16.21 | 54         |                       |                                             |



---

|    |     |       |       |     |                  |                                                 |
|----|-----|-------|-------|-----|------------------|-------------------------------------------------|
| 37 | ATO | 0.078 | 18.44 | 12  |                  |                                                 |
| 38 | MTW | 0.079 | 17.59 | 14  |                  |                                                 |
| 39 | YFI | 0.080 | 16.11 | 60  |                  |                                                 |
| 40 | BIK | 0.080 | 18.45 | 6   |                  |                                                 |
| 41 | MFS | 0.081 | 17.30 | 18  |                  |                                                 |
| 42 | HEU | 0.081 | 17.21 | 18  | K-Heulandite     | Acta Cryst., B39, 189-197 (1983)                |
| 43 | MOR | 0.082 | 16.83 | 24  | Mordenite, de-al | Chem. Lett., , 1547-1550 (1983)                 |
| 44 | FER | 0.082 | 17.38 | 18  | [Si-O]-FER       | Zeolites, 7, 442-445 (1987)                     |
| 45 | RTE | 0.082 | 16.78 | 12  | *RUB-3           | Microporous Mesoporous Mat., 26, 49-59 (1998)   |
| 46 | UWY | 0.082 | 15.93 | 60  |                  |                                                 |
| 47 | NSI | 0.082 | 18.55 | 6   | *Nu-6(2)         | Angew. Chem. Int. Ed., 43, 4933-4937 (2004)     |
| 48 | BOG | 0.084 | 15.50 | 48  |                  |                                                 |
| 49 | STI | 0.084 | 16.46 | 18  |                  |                                                 |
| 50 | CAS | 0.084 | 18.56 | 12  | EU-20b           | Microporous Mesoporous Mat., 90, 87-101 (2006)  |
| 51 | IFR | 0.084 | 16.56 | 16  | ITQ-4            | J. Am. Chem. Soc., 123, 5453-5459 (2001)        |
| 52 | LAU | 0.085 | 17.63 | 12  |                  |                                                 |
| 53 | ETL | 0.085 | 17.87 | 36  | *H-EU-12         | Angew. Chem. Int. Ed., 55, 7369-7373 (2016)     |
| 54 | OSI | 0.086 | 17.37 | 16  |                  |                                                 |
| 55 | BCT | 0.086 | 18.74 | 4   |                  |                                                 |
| 56 | DAC | 0.086 | 17.26 | 12  |                  |                                                 |
| 57 | BRE | 0.087 | 17.82 | 16  |                  |                                                 |
| 58 | SEW | 0.087 | 15.97 | 66  |                  |                                                 |
| 59 | RWR | 0.088 | 18.92 | 16  | *RUB-24          | Microporous Mesoporous Mat., 83, 201-211 (2005) |
| 60 | PCS | 0.088 | 17.63 | 64  | *IPC-6           | Nature Chem., 9, 1012-1018 (2017)               |
| 61 | ESV | 0.088 | 17.26 | 48  |                  |                                                 |
| 62 | IFO | 0.088 | 16.66 | 32  |                  |                                                 |
| 63 | ITE | 0.089 | 15.64 | 32  | *ITQ-3           | Angew. Chem. Int. Ed., 36, 2659-2661 (1997)     |
| 64 | EEL | 0.089 | 17.70 | 50  | *ERS-18          | Microporous Mesoporous Mat., 143, 6-13 (2011)   |
| 65 | SZR | 0.089 | 17.42 | 18  |                  |                                                 |
| 66 | RTH | 0.089 | 15.67 | 16  |                  |                                                 |
| 67 | IWW | 0.089 | 15.97 | 112 |                  |                                                 |
| 68 | MSE | 0.089 | 15.87 | 112 | YNU-2            | Angew. Chem. Int. Ed., 47, 1042-1046 (2008)     |
| 69 | IFW | 0.090 | 15.53 | 32  |                  |                                                 |
| 70 | NON | 0.090 | 17.43 | 22  | *Nonasil         | J. Incl. Phenom., 4, 339-349 (1986)             |
| 71 | ATN | 0.090 | 17.56 | 8   |                  |                                                 |
| 72 | ITG | 0.090 | 15.94 | 56  |                  |                                                 |
| 73 | AET | 0.090 | 17.39 | 36  |                  |                                                 |
| 74 | AWW | 0.090 | 16.62 | 24  |                  |                                                 |
| 75 | EPI | 0.091 | 17.42 | 12  |                  |                                                 |
| 76 | POS | 0.092 | 15.08 | 64  |                  |                                                 |
| 77 | SFN | 0.092 | 16.08 | 16  |                  |                                                 |
| 78 | JSW | 0.092 | 17.91 | 48  |                  |                                                 |
| 79 | ITW | 0.093 | 17.52 | 12  | *ITQ-12          | Chem. Commun., , 2114-2115 (2003)               |

---

---

|     |     |       |       |     |                   |                                                      |
|-----|-----|-------|-------|-----|-------------------|------------------------------------------------------|
| 80  | ATS | 0.093 | 15.85 | 12  | SSZ-55            | J. Phys. Chem. B, 106, 264-270 (2002)                |
| 81  | IWR | 0.093 | 15.22 | 28  |                   |                                                      |
| 82  | SFE | 0.093 | 16.67 | 14  | *SSZ-48           | J. Phys. Chem. B, 103, 8245-8250 (1999)              |
| 83  | EUO | 0.093 | 17.00 | 56  | o-FDBDM-ZSM-50    | Chem. Mater., 17, 4374-4385 (2005)                   |
| 84  | UOV | 0.093 | 15.75 | 88  | *IM-17            | RSC Adv., 4, 19440-19449 (2014)                      |
| 85  | MWW | 0.093 | 15.67 | 72  | ITQ-1             | Chem. Mater., 8, 2415-2417 (1996)                    |
| 86  | UTL | 0.093 | 15.13 | 38  |                   |                                                      |
| 87  | BEA | 0.094 | 14.96 | 64  | pure silica beta  | Chem. Commun., , 2365-2366 (1996)                    |
| 88  | ANA | 0.094 | 18.92 | 24  | [Cs-Fe][Si-O]-ANA | Am. Mineral., 48, 100-109 (1963)                     |
| 89  | DOH | 0.094 | 16.79 | 34  | *Dodecasil 1H     | Z. Kristallogr., 166, 11-22 (1984)                   |
| 90  | APD | 0.094 | 17.73 | 16  |                   |                                                      |
| 91  | SFF | 0.094 | 16.67 | 32  | *SSZ-44           | Angew. Chem. Int. Ed., 38, 1269-1272 (1999)          |
| 92  | EON | 0.094 | 16.68 | 60  |                   |                                                      |
| 93  | SFH | 0.095 | 16.07 | 32  |                   |                                                      |
| 94  | SSY | 0.095 | 16.62 | 28  |                   |                                                      |
| 95  | AWO | 0.095 | 17.63 | 24  |                   |                                                      |
| 96  | AST | 0.095 | 15.64 | 10  | Octadecasil       | Eur. J. Solid State Inorg. Chem., 28, 345-361 (1991) |
| 97  | PWW | 0.095 | 16.80 | 20  |                   |                                                      |
| 98  | YUG | 0.095 | 17.67 | 8   |                   |                                                      |
| 99  | PON | 0.095 | 17.76 | 24  |                   |                                                      |
| 100 | SOV | 0.096 | 14.89 | 64  |                   |                                                      |
| 101 | STF | 0.096 | 16.40 | 16  | *SSZ-35           | Angew. Chem. Int. Ed., 38, 1269-1272 (1999)          |
| 102 | UEI | 0.096 | 17.68 | 12  |                   |                                                      |
| 103 | OWE | 0.097 | 16.91 | 16  |                   |                                                      |
| 104 | STT | 0.097 | 16.15 | 64  | *SSZ-23           | Angew. Chem. Int. Ed., 37, 2122-2126 (1998)          |
| 105 | UOE | 0.098 | 17.36 | 12  |                   |                                                      |
| 106 | LTN | 0.098 | 16.40 | 192 |                   |                                                      |
| 107 | UOS | 0.098 | 17.35 | 24  |                   |                                                      |
| 108 | BEC | 0.098 | 14.77 | 32  | ITQ-14 overgrowth | J. Am. Chem. Soc., 123, 5370-5371 (2001)             |
| 109 | UOZ | 0.098 | 18.82 | 40  |                   |                                                      |
| 110 | EAB | 0.098 | 15.75 | 36  |                   |                                                      |
| 111 | CSV | 0.099 | 15.69 | 20  | *CIT-7            | Chem. Sci., 6, 1728-1734 (2015)                      |
| 112 | ABW | 0.099 | 17.37 | 4   |                   |                                                      |
| 113 | JSN | 0.099 | 17.32 | 16  |                   |                                                      |
| 114 | FRA | 0.099 | 16.74 | 60  |                   |                                                      |
| 115 | SOD | 0.099 | 16.45 | 6   | Silica sodalite   | Nature, 317, 157-158 (1985)                          |
| 116 | ATT | 0.100 | 16.90 | 12  |                   |                                                      |
| 117 | ZON | 0.100 | 17.34 | 32  |                   |                                                      |
| 118 | CGF | 0.100 | 18.43 | 18  |                   |                                                      |
| 119 | SOR | 0.100 | 16.88 | 24  |                   |                                                      |
| 120 | OFF | 0.100 | 15.83 | 18  |                   |                                                      |
| 121 | LEV | 0.100 | 15.73 | 18  | NU-3              | Mater. Sci. Forum, 133-136, 423-433 (1993)           |
| 122 | FAR | 0.100 | 16.67 | 84  |                   |                                                      |
| 123 | KFI | 0.101 | 14.74 | 48  |                   |                                                      |

---

---

|     |     |       |       |     |            |                                         |
|-----|-----|-------|-------|-----|------------|-----------------------------------------|
| 124 | GIU | 0.101 | 16.82 | 96  |            |                                         |
| 125 | MER | 0.101 | 16.13 | 16  |            |                                         |
| 126 | SFO | 0.101 | 14.87 | 16  |            |                                         |
| 127 | AVE | 0.101 | 16.13 | 48  |            |                                         |
| 128 | SWY | 0.101 | 15.82 | 72  |            |                                         |
| 129 | AEN | 0.101 | 19.32 | 24  |            |                                         |
| 130 | IRN | 0.101 | 15.09 | 46  |            |                                         |
| 131 | MRT | 0.101 | 16.91 | 24  |            |                                         |
| 132 | MAR | 0.101 | 16.60 | 72  |            |                                         |
| 133 | SAT | 0.101 | 16.19 | 24  |            |                                         |
| 134 | LTF | 0.101 | 16.71 | 108 | *LZ-135    | J. Phys. Chem. C, 113, 9838-9850 (2009) |
| 135 | CFI | 0.102 | 16.33 | 16  | *CIT-5     | Chem. Commun., , 2179-2180 (1997)       |
| 136 | ASV | 0.102 | 19.45 | 20  |            |                                         |
| 137 | AFR | 0.102 | 14.88 | 32  |            |                                         |
| 138 | LTL | 0.102 | 16.48 | 36  |            |                                         |
| 139 | OKO | 0.102 | 16.87 | 34  | *COK-14    | Nature Mater., 11, 1059-1064 (2012)     |
| 140 | ERI | 0.102 | 15.80 | 36  |            |                                         |
| 141 | MOZ | 0.102 | 16.70 | 108 |            |                                         |
| 142 | PHI | 0.103 | 16.13 | 16  |            |                                         |
| 143 | EZT | 0.103 | 16.89 | 24  |            |                                         |
| 144 | SAS | 0.103 | 15.17 | 16  | SSZ-73     | U.S. Patent 7,138,099, (2006)           |
| 145 | AEI | 0.103 | 14.81 | 24  |            |                                         |
| 146 | MAZ | 0.103 | 16.53 | 36  |            |                                         |
| 147 | PWO | 0.103 | 16.78 | 20  |            |                                         |
| 148 | TSC | 0.103 | 12.97 | 96  |            |                                         |
| 149 | SIV | 0.104 | 16.10 | 32  |            |                                         |
| 150 | GME | 0.104 | 14.81 | 24  |            |                                         |
| 151 | EMT | 0.104 | 13.03 | 96  |            |                                         |
| 152 | FAU | 0.104 | 13.03 | 48  |            |                                         |
| 153 | GIS | 0.104 | 16.14 | 8   |            |                                         |
| 154 | SAV | 0.104 | 14.83 | 48  |            |                                         |
| 155 | PAU | 0.104 | 15.71 | 336 |            |                                         |
| 156 | SFW | 0.104 | 14.81 | 36  |            |                                         |
| 157 | MWF | 0.104 | 15.84 | 720 |            |                                         |
| 158 | PWN | 0.104 | 15.38 | 120 |            |                                         |
| 159 | AFX | 0.104 | 14.81 | 48  |            |                                         |
| 160 | CTH | 0.104 | 15.72 | 64  |            |                                         |
| 161 | AFT | 0.105 | 14.82 | 72  |            |                                         |
| 162 | CHA | 0.105 | 14.80 | 12  | [Si-O]-CHA | Chem. Commun., , 1881-1882 (1998)       |
| 163 | IWS | 0.105 | 14.34 | 68  |            |                                         |
| 164 | AFG | 0.105 | 16.60 | 48  |            |                                         |
| 165 | RHO | 0.105 | 14.23 | 24  |            |                                         |
| 166 | TOL | 0.105 | 16.62 | 72  |            |                                         |
| 167 | LIO | 0.106 | 16.57 | 36  |            |                                         |

---

---

|     |     |       |       |     |         |                                               |
|-----|-----|-------|-------|-----|---------|-----------------------------------------------|
| 168 | MTN | 0.107 | 16.98 | 34  | CF-4    | J. Incl. Phenom., 5, 355-362 (1987)           |
| 169 | CAN | 0.107 | 16.57 | 12  |         |                                               |
| 170 | EWS | 0.107 | 16.63 | 48  |         |                                               |
| 171 | NPO | 0.107 | 19.90 | 6   |         |                                               |
| 172 | DFO | 0.108 | 14.57 | 132 |         |                                               |
| 173 | LOS | 0.108 | 16.53 | 24  |         |                                               |
| 174 | ISV | 0.108 | 14.63 | 64  | *ITQ-7  | Angew. Chem. Int. Ed., 38, 1997-2000 (1999)   |
| 175 | SOF | 0.109 | 16.12 | 20  |         |                                               |
| 176 | CGS | 0.110 | 16.52 | 32  |         |                                               |
| 177 | LTJ | 0.110 | 18.08 | 16  |         |                                               |
| 178 | MEI | 0.110 | 14.21 | 34  | ZSM-18  | Zeolites, 14, 635-642 (1994)                  |
| 179 | SBE | 0.110 | 13.48 | 64  |         |                                               |
| 180 | AFV | 0.111 | 15.41 | 30  |         |                                               |
| 181 | SBS | 0.111 | 13.45 | 96  |         |                                               |
| 182 | IWV | 0.111 | 14.67 | 38  |         |                                               |
| 183 | SBT | 0.112 | 13.45 | 48  |         |                                               |
| 184 | APC | 0.112 | 17.28 | 16  |         |                                               |
| 185 | UFI | 0.112 | 14.80 | 32  |         |                                               |
| 186 | USI | 0.113 | 15.57 | 20  |         |                                               |
| 187 | RRO | 0.114 | 17.19 | 18  | RUB-41  | Chem. Mater., 17, 43-49 (2005)                |
| 188 | AVL | 0.114 | 15.23 | 42  |         |                                               |
| 189 | ITT | 0.115 | 12.44 | 46  |         |                                               |
| 190 | ACO | 0.115 | 16.26 | 8   |         |                                               |
| 191 | AFS | 0.116 | 14.31 | 56  |         |                                               |
| 192 | ETR | 0.117 | 15.15 | 48  |         |                                               |
| 193 | BPH | 0.117 | 14.34 | 28  |         |                                               |
| 194 | JNT | 0.118 | 19.61 | 32  |         |                                               |
| 195 | MON | 0.118 | 17.42 | 8   |         |                                               |
| 196 | DFT | 0.119 | 17.38 | 8   |         |                                               |
| 197 | IFY | 0.120 | 16.82 | 48  | *ITQ-50 | Angew. Chem. Int. Ed., 52, 10458-10462 (2013) |
| 198 | STW | 0.120 | 15.87 | 60  |         |                                               |
| 199 | SAO | 0.120 | 13.66 | 28  |         |                                               |
| 200 | LTA | 0.121 | 13.96 | 24  |         |                                               |
| 201 | AFN | 0.122 | 17.43 | 16  |         |                                               |
| 202 | POR | 0.123 | 17.06 | 64  |         |                                               |
| 203 | VNI | 0.128 | 17.23 | 60  |         |                                               |
| 204 | CDO | 0.130 | 17.80 | 18  | UZM-25  | Stud. Surf. Sci. Catal., 170A, 338-346 (2007) |
| 205 | NES | 0.131 | 16.26 | 34  |         |                                               |
| 206 | IRR | 0.132 | 11.33 | 52  |         |                                               |
| 207 | GOO | 0.136 | 17.92 | 16  |         |                                               |
| 208 | LOV | 0.141 | 16.44 | 18  |         |                                               |
| 209 | RSN | 0.143 | 16.44 | 18  |         |                                               |
| 210 | VSV | 0.144 | 16.45 | 18  |         |                                               |
| 211 | EDI | 0.151 | 16.04 | 5   |         |                                               |

---

---

|     |           |              |             |           |                            |
|-----|-----------|--------------|-------------|-----------|----------------------------|
| 212 | THO       | 0.151        | 16.01       | 10        |                            |
| 213 | NAT       | 0.152        | 16.01       | 10        |                            |
| 214 | AHT       | 0.153        | 18.00       | 12        |                            |
| 215 | VFI       | 0.157        | 13.79       | 36        |                            |
| 216 | PUN       | 0.159        | 14.50       | 36        |                            |
| 217 | SBN       | 0.160        | 15.87       | 10        |                            |
| 218 | NAB       | 0.167        | 15.76       | 5         |                            |
| 219 | MVY       | 0.168        | 20.20       | 12        |                            |
| 220 | WEI       | 0.169        | 15.58       | 10        |                            |
| 221 | NPT       | 0.169        | 13.12       | 36        |                            |
| 222 | AFY       | 0.174        | 13.63       | 16        |                            |
| 223 | BOZ       | 0.177        | 12.47       | 46        |                            |
| 224 | JOZ       | 0.178        | 15.90       | 20        |                            |
| 225 | OBW       | 0.178        | 12.33       | 38        |                            |
|     | <b>DL</b> | <b>0.181</b> | <b>3.78</b> | <b>12</b> |                            |
| 226 | BSV       | 0.214        | 17.88       | 48        | Observed in GaGeO material |
| 227 | JSR       | 0.217        | 11.76       | 96        | Observed in GaGeO material |
| 228 | JST       | 0.229        | 13.70       | 48        | Observed in GaGeO material |
| 229 | OSO       | 0.230        | 12.69       | 9         | Observed in BeSiO material |
| 230 | CZP       | 0.239        | 19.65       | 24        | Observed in ZnPO material  |
| 231 | SOS       | 0.247        | 16.49       | 24        | Observed in BGeO material  |
| 232 | RWY       | 0.468        | 8.26        | 24        | Observed in GaGeO material |
| 233 | CLO       | 1.236        | 11.11       | 196       | Observed in GaPO material  |

---

**Table S7 | The identified global minima structures and G-NN energies from E-SSW-NN simulation with different repulsive potential radius  $r_s$ .**

| $r_s$ | SAPO compositions (energy eV/f.u.)                                                               |                                                                                                  |                                                                                                   |
|-------|--------------------------------------------------------------------------------------------------|--------------------------------------------------------------------------------------------------|---------------------------------------------------------------------------------------------------|
|       | SiO <sub>2</sub>                                                                                 | AlPO                                                                                             | Si <sub>0.5</sub> Al <sub>0.5</sub> O <sub>2</sub> H <sub>0.5</sub>                               |
| 3     | 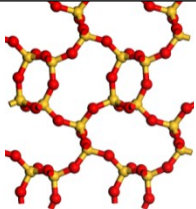<br>0.046       | <br>0.027       | <br>0.002       |
| 3.5   | <br>0.062       | <br>0.071 ATV   | <br>0.026       |
| 4     | <br>0.099 SOD  | <br>0.062 ATO  | <br>0.06       |
| 4.5   | <br>0.105 CHA | <br>0.071 ATS | <br>0.094     |
| 5~5.5 | <br>0.105 CHA | <br>0.103 CHA | <br>0.147 CHA |
| 6     | <br>0.398     | <br>0.739     | <br>0.407     |

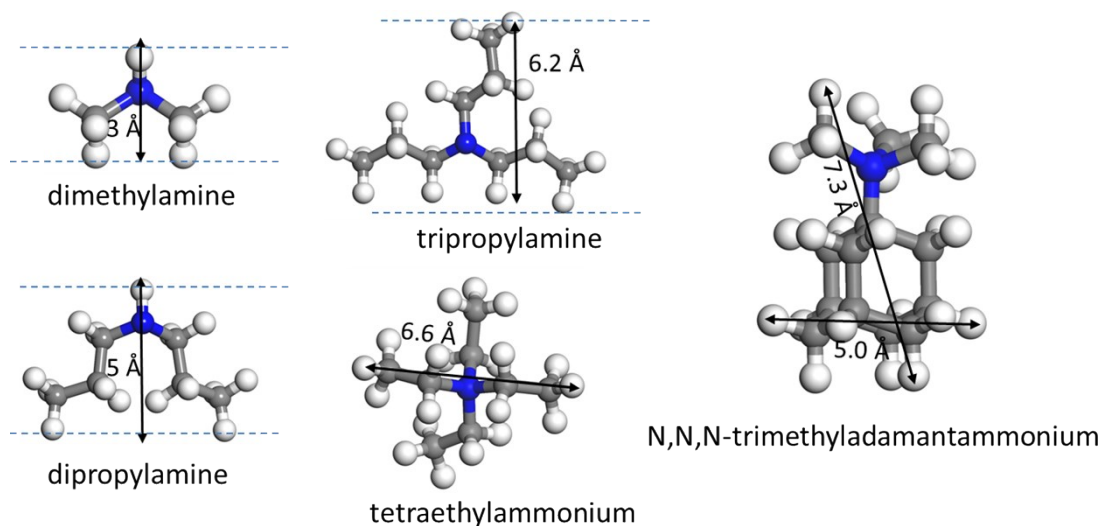

**Figure S3 | The experimentally used SDAs for synthesizing *ATV*, *ATO*, *ATS* and *CHA* zeolites.**

Experimentally, the SDAs for synthesizing *ATV*, *ATO*, *ATS* and *CHA* zeolites are dimethylamine, dipropylamine, tripropylamine and tetraethylammonium (or N,N,N-trimethyladamantammonium) whose molecular diameters are around 6, 8, 9.2 and 9.6 Å (plus 3 Å for distances between H in SDAs and O in zeolite skeleton), respectively.<sup>3-6</sup>

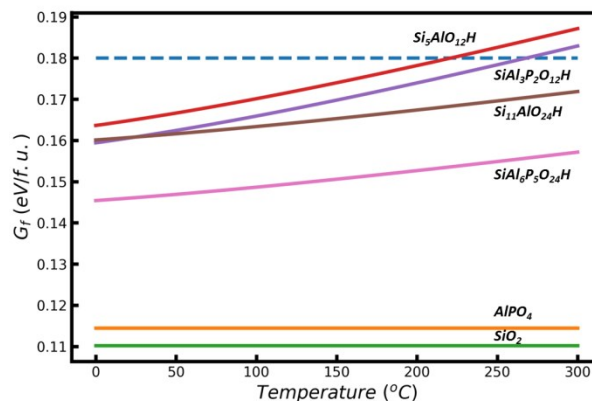

**Figure S4.** The Gibbs formation energy profiles at different hydrothermal temperature and water saturated vapor pressures for CHA-type zeolite with different compositions.

The temperature effect in the formation of CHA-type zeolite with different compositions is examined, as shown in Figure S4. The hydrothermal temperature does not affect the stabilities of  $AlPO_4$  and  $SiO_2$  zeolites (both have no extra H in framework), but significantly affects the stabilities of SAPO and aluminosilicates zeolites. By comparing to the upper bounds of 0.18 eV/f.u.,  $Si_5AlO_{12}H$  and  $SiAl_3P_2O_{12}H$  compositions can only be thermodynamically accessible at the temperature lower than 200 and 250 °C, respectively. Decreasing the hydrothermal temperature is conducive to the formation of zeolites, but too low temperature will slow crystallization rate. This may explain the common hydrothermal temperature region in experiment of 100 ~ 200 °C. Therefore, we choose 200 °C as the reference in manuscript.



**Table S8 | The 23 kinds of as-synthesized SAPO zeolites from 252 zeolite bank (IZC-SC), showing the limited  $n_P:n_{Si}$  ratio (>2 in general).**

| code | material        | Material composition                                                                                     | $n_P:n_{Si}$ | reference                                         |
|------|-----------------|----------------------------------------------------------------------------------------------------------|--------------|---------------------------------------------------|
| 1    | AEI SAPO-18     | [Al-Si-P-O]-AEI                                                                                          |              | Catalysis Letters, 28, 241-248 (1994)             |
| 2    | AEL SAPO-11     | [Al <sub>17.6</sub> Si <sub>5.6</sub> P <sub>16.8</sub> O <sub>80</sub> ]-AEL                            | 3.00         | Pure Appl. Chem., 58, 1351-1358 (1986)            |
| 3    | AEN CFSAPO-1A   | [(MA) <sub>12.28</sub> ][Al <sub>22.33</sub> P <sub>22.10</sub> Si <sub>3.57</sub> O <sub>96</sub> ]-AEN | 6.19         | J. Incl. Phenom., 5, 591-599 (1987)               |
| 4    | AET MCM-37      | [Al-Si-P-O]-AET                                                                                          |              | U.S. Patent 5091073,(1992)                        |
| 5    | AFI SAPO-5      | [Al <sub>10.8</sub> Si <sub>3.36</sub> P <sub>9.84</sub> O <sub>48</sub> ]-AFI                           | 2.93         | Pure Appl. Chem., 58, 1351-1358 (1986)            |
| 6    | AFO SAPO-41     | [Si <sub>0.8</sub> Al <sub>20.4</sub> P <sub>18.8</sub> O <sub>80</sub> ]-AFO                            | 17.50        | J. Chem. Soc., Faraday Trans., 94, 723-727 (1998) |
| 7    | AFR *SAPO-40    | [Si <sub>4</sub> Al <sub>14</sub> P <sub>14</sub> O <sub>64</sub> ]-AFR                                  |              | J. Appl. Crystallogr., 25, 539-543 (1992)         |
| 8    | AFV SAPO-57     | [Al-Si-P-O]-AFV                                                                                          |              | Microporous Mesoporous Mat., 189, 49-63 (2014)    |
| 9    | AFX *SAPO-56    | [Al <sub>23</sub> Si <sub>5</sub> P <sub>20</sub> O <sub>96</sub> ]-AFX                                  | 4.00         | private communication, , (1994)                   |
| 10   | ANA [Al-Si-P-O] | [Al <sub>24</sub> Si <sub>13</sub> P <sub>11</sub> O <sub>96</sub> ]-ANA                                 | 0.85         | Acta Crystallogr., C40, 214-217 (1984)            |
| 11   | ATN SAPO-39     | [Si <sub>1.12</sub> Al <sub>7.84</sub> P <sub>7.2</sub> O <sub>32</sub> ]-ATN                            | 6.43         | Zeolites, 18, 350-355 (1997)                      |
| 12   | ATO SAPO-31     | [Al <sub>18</sub> Si <sub>2</sub> P <sub>16</sub> O <sub>72</sub> ]-ATO                                  | 8.00         | Acta Crystallogr., B50, 290-294 (1994)            |
| 13   | AVL SAPO-59     | [Al <sub>21</sub> P <sub>14.49</sub> Si <sub>5.88</sub> O <sub>84</sub> ]-AVL                            | 2.46         | Microporous Mesoporous Mat., 189, 49-63 (2014)    |
| 14   | CHA ZYT-6       | [Al <sub>20</sub> Si <sub>5</sub> P <sub>15</sub> O <sub>80</sub> ]-CHA                                  | 3.00         | Acta Crystallogr., C41, 1698-1700 (1985)          |
| 15   | CHA SAPO-47     | [Al <sub>18</sub> Si <sub>4.2</sub> P <sub>13.8</sub> O <sub>72</sub> ]-CHA                              | 3.29         | J. Phys. Chem., 93, 6516-6520 (1989)              |
| 16   | FAU SAPO-37     | [Al-Si-P-O]-FAU                                                                                          |              | J. Am. Chem. Soc., 106, 6092-6093 (1984)          |
| 17   | GIS SAPO-43     | [Al-Si-P-O]-GIS                                                                                          |              | Acta Crystallogr., B49, 413-420 (1993)            |
| 18   | IFO *ITQ-51     | [Si <sub>2.6</sub> Al <sub>14.7</sub> P <sub>14.7</sub> O <sub>64</sub> ]-IFO                            | 5.65         | Proc. Natl. Acad. Sci., 110, 3749-3754 (2013)     |
| 19   | LEV SAPO-67     | [Al <sub>27</sub> P <sub>21.87</sub> Si <sub>5.94</sub> O <sub>108</sub> ]-LEV                           | 3.68         | Microporous Mesoporous Mat., 189, 49-63 (2014)    |
| 20   | LTA SAPO-42     | [Al-Si-P-O]-LTA                                                                                          |              | J. Am. Chem. Soc., 106, 6092-6093 (1984)          |
| 21   | MEI ECR-40      | [Al <sub>15.95</sub> Si <sub>5.85</sub> P <sub>12.21</sub> O <sub>68</sub> ]-MEI                         | 2.09         | Stud. Surf. Sci. Catal., 154, 1274-1281 (2004)    |
| 22   | SWY *STA-20     | [Al <sub>36</sub> P <sub>30.4</sub> Si <sub>5.6</sub> O <sub>144</sub> ]-SWY                             | 5.43         | Chem. Mater., 29, 2180-2190 (2017)                |
| 23   | VFI MCM-9       | [Al-Si-P-O]-VFI                                                                                          |              | Appl. Catal., 51, L13-L20 (1989)                  |

\*[Al<sub>24</sub>Si<sub>13</sub>P<sub>11</sub>O<sub>96</sub>]-ANA material with the low Si:P = 0.85 is synthesized under alkaline condition, while other materials are synthesized under neutral or acidic condition.

**Table S9 | The formation free energy ( $G_f$ ) and proportions of  $TO_4$  (monomer,  $P_T$ ) and their linkages (T-O-T',  $P_{TT'}$ ) for each CHA-type SAPO compositions.**

| name        | $G_f$ | $P_{Si}$ | $P_{Al}$ | $P_P$ | $P_{SiAl}$ | $P_{SiSi}$ | $P_{SiP}$ | $P_{AlAl}$ | $P_{AlP}$ |
|-------------|-------|----------|----------|-------|------------|------------|-----------|------------|-----------|
| Si0Al6P6H0  | 0.114 | 0.000    | 0.500    | 0.500 | 0.000      | 0.000      | 0.000     | 0.000      | 1.000     |
| Si10Al1P1H0 | 0.200 | 0.833    | 0.083    | 0.083 | 0.125      | 0.708      | 0.125     | 0.000      | 0.042     |
| Si10Al2P0H2 | 0.182 | 0.833    | 0.167    | 0.000 | 0.333      | 0.667      | 0.000     | 0.000      | 0.000     |
| Si11Al1P0H1 | 0.169 | 0.917    | 0.083    | 0.000 | 0.167      | 0.833      | 0.000     | 0.000      | 0.000     |
| Si12Al0P0H0 | 0.110 | 1.000    | 0.000    | 0.000 | 0.000      | 1.000      | 0.000     | 0.000      | 0.000     |
| Si1Al6P5H1  | 0.155 | 0.083    | 0.500    | 0.417 | 0.167      | 0.000      | 0.000     | 0.000      | 0.833     |
| Si2Al5P5H0  | 0.203 | 0.167    | 0.417    | 0.417 | 0.125      | 0.042      | 0.125     | 0.000      | 0.708     |
| Si2Al6P4H2  | 0.178 | 0.167    | 0.500    | 0.333 | 0.333      | 0.000      | 0.000     | 0.000      | 0.667     |
| Si3Al5P4H1  | 0.203 | 0.250    | 0.417    | 0.333 | 0.250      | 0.083      | 0.083     | 0.000      | 0.583     |
| Si3Al6P3H3  | 0.216 | 0.250    | 0.500    | 0.250 | 0.500      | 0.000      | 0.000     | 0.000      | 0.500     |
| Si4Al4P4H0  | 0.207 | 0.333    | 0.333    | 0.333 | 0.167      | 0.167      | 0.167     | 0.000      | 0.500     |
| Si4Al5P3H2  | 0.231 | 0.333    | 0.417    | 0.250 | 0.375      | 0.125      | 0.042     | 0.000      | 0.458     |
| Si4Al6P2H4  | 0.240 | 0.333    | 0.500    | 0.167 | 0.667      | 0.000      | 0.000     | 0.000      | 0.333     |
| Si5Al4P3H1  | 0.226 | 0.417    | 0.333    | 0.250 | 0.292      | 0.208      | 0.125     | 0.000      | 0.375     |
| Si5Al5P2H3  | 0.232 | 0.417    | 0.417    | 0.167 | 0.500      | 0.167      | 0.000     | 0.000      | 0.333     |
| Si5Al6P1H5  | 0.276 | 0.417    | 0.500    | 0.083 | 0.583      | 0.125      | 0.000     | 0.125      | 0.167     |
| Si6Al3P3H0  | 0.247 | 0.500    | 0.250    | 0.250 | 0.208      | 0.292      | 0.208     | 0.000      | 0.292     |
| Si6Al4P2H2  | 0.231 | 0.500    | 0.333    | 0.167 | 0.417      | 0.250      | 0.083     | 0.000      | 0.250     |
| Si6Al5P1H4  | 0.231 | 0.500    | 0.417    | 0.083 | 0.500      | 0.250      | 0.000     | 0.083      | 0.167     |
| Si6Al6P0H6  | 0.304 | 0.500    | 0.500    | 0.000 | 0.750      | 0.125      | 0.000     | 0.125      | 0.000     |
| Si7Al3P2H1  | 0.231 | 0.583    | 0.250    | 0.167 | 0.292      | 0.375      | 0.125     | 0.000      | 0.208     |
| Si7Al4P1H3  | 0.286 | 0.583    | 0.333    | 0.083 | 0.542      | 0.250      | 0.125     | 0.042      | 0.042     |
| Si7Al5P0H5  | 0.256 | 0.583    | 0.417    | 0.000 | 0.500      | 0.333      | 0.000     | 0.167      | 0.000     |
| Si8Al2P2H0  | 0.206 | 0.667    | 0.167    | 0.167 | 0.167      | 0.500      | 0.167     | 0.000      | 0.167     |
| Si8Al3P1H2  | 0.269 | 0.667    | 0.250    | 0.083 | 0.458      | 0.375      | 0.125     | 0.000      | 0.042     |
| Si8Al4P0H4  | 0.233 | 0.667    | 0.333    | 0.000 | 0.500      | 0.417      | 0.000     | 0.083      | 0.000     |
| Si9Al2P1H1  | 0.205 | 0.750    | 0.167    | 0.083 | 0.250      | 0.583      | 0.083     | 0.000      | 0.083     |
| Si9Al3P0H3  | 0.212 | 0.750    | 0.250    | 0.000 | 0.333      | 0.583      | 0.000     | 0.083      | 0.000     |

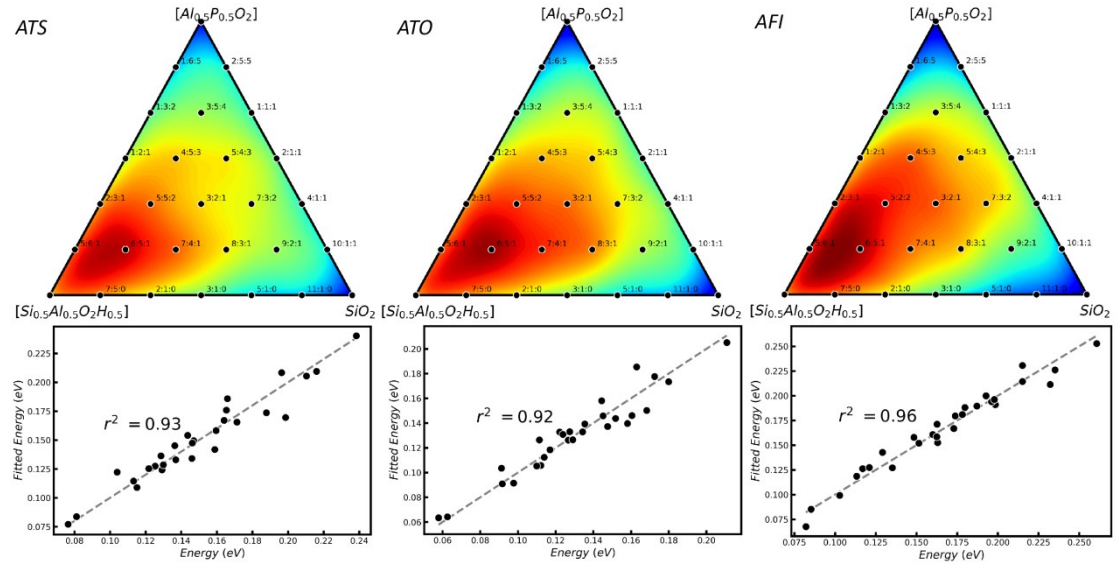

**Figure S5 | Thermodynamics for ATS-, ATO- and AFI-type zeolites with different Si:Al:P compositions.** The formation energy thermodynamic ternary phase diagram of different SAPO compositions with the energies of pure  $\text{SiO}_2$ , AlPO and Si:Al = 1:1 compositions as the energy references. The relationship between the calculated  $G_{f,DFT}$  and the fitted  $G_{f,fit}$  obtained from the following equations.

$$G_{f,ATS} = (0.15 * P_{Si} + 0.14 * P_{Al} + 0.13 * P_P) + (0.31 * P_{SiP} + 0.10 * P_{AlAl} + 0.13 * P_{SiAl} - 0.07 * P_{SiSi} - 0.05 * P_{AlP}) \quad \text{ATS}$$

$$G_{f,ATO} = (0.13 * P_{Si} + 0.12 * P_{Al} + 0.11 * P_P) + (0.28 * P_{SiP} + 0.09 * P_{AlAl} + 0.11 * P_{SiAl} - 0.06 * P_{SiSi} - 0.05 * P_{AlP}) \quad \text{ATO}$$

$$G_{f,AFI} = (0.14 * P_{Si} + 0.16 * P_{Al} + 0.12 * P_P) + (0.28 * P_{SiP} + 0.12 * P_{AlAl} + 0.14 * P_{SiAl} - 0.07 * P_{SiSi} - 0.05 * P_{AlP}) \quad \text{AFI}$$

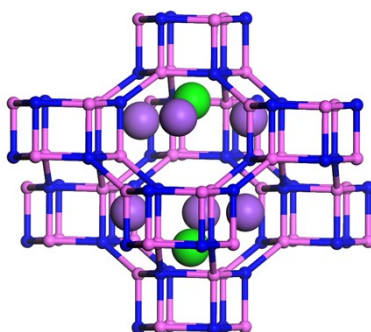

**Figure S6.** The possible Na ion positions in *cha* cage of CHA-type zeolite.

For the position of the Na, it locates at extra framework sites in the *cha* cage of CHA-type zeolite. The possible positions for Na ions are shown in Figure S6 above, i.e. at the centers of 6- and 8-membered ring. The most stable structure for Na-containing CHA is determined by Metropolis Monte Carlo sampling in the fixed *CHA*-type framework where all the likely positions of Na atoms are utilized as the pool of sites for random selection. From Metropolis Monte Carlo sampling, we found that Na ion prefers to first occupy the top and lower sites of 6-membered ring, as labeled by green balls in Figure S6, and then occupy the center of 8-membered ring, as labeled by purple ball in Figure S6.

**Table S10 | The 93 kinds of as-synthesized aluminosilicates zeolites from 252 zeolite bank (IZC-SC).**

|   | Name | Material                | Material composition                                                         | Reference                                                 |
|---|------|-------------------------|------------------------------------------------------------------------------|-----------------------------------------------------------|
| 1 | ABW  | *Li-A                   | $Li_4(H_2O)_4 [Al_2Si_4O_{16}]$ -ABW                                         | Z. Kristallogr., 139, 186-195 (1974)                      |
| 2 | AEI  | SSZ-39, calcined        | $[Al_{0.8}Si_{47.2}O_{96}]$ -AEI                                             | J. Am. Chem. Soc., 122, 263-273 (2000)                    |
| 3 | AFG  | *Afghanite              | $[Ca_{0.8}Na_{2.2}Cl_2(SO_4)_{5.3}CO_3(H_2O)_4] [Al_{24}Si_{24}O_{96}]$ -AFG | Dokl. Akad. Nauk SSSR, 320, 882-886 (1991)                |
| 4 | AFX  | SSZ-16                  | $[Si_{41.1}Al_{6.9}O_{96}]$ -AFX                                             | Chem. Mater., 8, 2409-2411 (1996)                         |
| 5 | ANA  | *Analcime               | $[Na_{16}(H_2O)_{16}] [Al_{16}Si_{32}O_{96}]$ -ANA                           | Z. Kristallogr., 135, 240-252 (1972)                      |
| 6 | ATT  | synthetic Rb-RMA-3      | $[Rb-H_2O] [Al_{5.2}Si_{18.8}O_{48}]$ -ATT                                   | Micropor. Mesopor. Mater., 114, 495-506 (2008)            |
| 7 | BCT  | [Ca-][Al-Si-O]-BCT      | $[Al_4Si_4O_{16}]$ -BCT                                                      | Z. Kristallogr., 137, 380-398 (1973)                      |
| 8 | BEA  | *Beta                   | $[Na_7] [Al_7Si_7O_{128}]$ *BEA                                              | Proc. R. Soc. Lond. A, 420, 375-405 (1988)                |
| 9 | BIK  | *Bikitaite              | $[Li_4(H_2O)_4]_{1/2} [Al_4Si_8O_{24}]_{1/2}$ -BIK                           | Zeolites, 9, 303-311 (1989)                               |
| 1 | BOG  | *Boggsite               | $[Ca_7Na_4(H_2O)_{74}] [Al_{18}Si_{78}O_{192}]$ -BOG                         | Am. Mineral., 75, 501-507 (1990)                          |
| 0 |      |                         |                                                                              |                                                           |
| 1 | BPH  | Linde Q                 | $[Al_{16}Si_{16}O_{96}]$ -BPH                                                | Zeolites, 11, 124-131 (1991)                              |
| 1 |      |                         |                                                                              |                                                           |
| 1 | BRE  | *Brewsterite            | $[Ba_{0.5}Sr_{1.5}(H_2O)_{10}] [Al_4Si_{12}O_{32}]$ -BRE                     | Acta Crystallogr., B33, 2907-2910 (1977)                  |
| 2 |      |                         |                                                                              |                                                           |
| 1 | CAN  | *Cancrinite             | $[Na_6CaCO_3(H_2O)_2] [Al_6Si_6O_{24}]$ -CAN                                 | Z. Kristallogr., 122, 407-422 (1965)                      |
| 3 |      |                         |                                                                              |                                                           |
| 1 | CAS  | *Cesium Aluminosilicate | $[Cs_4] [Al_4Si_{20}O_{48}]$ -CAS                                            | Z. Kristallogr., 152, 207-213 (1980)                      |
| 4 |      |                         |                                                                              |                                                           |
| 1 | CHA  | *Chabazite              | $[Ca_6(H_2O)_{40}]_{1/3} [Al_{12}Si_{24}O_{72}]_{1/3}$ -CHA                  | Acta Crystallogr., 16, 45-53 (1963)                       |
| 5 |      |                         |                                                                              |                                                           |
| 1 | CON  | SSZ-26                  | $[Al-Si-O]$ -CON                                                             | Science, 262, 1543-1546 (1993)                            |
| 6 |      |                         |                                                                              |                                                           |
| 1 | DAC  | *Dachiardite            | $[(Ca_{0.5},K,Na)_5(H_2O)_{12}] [Al_5Si_{19}O_{48}]$ -DAC                    | Z. Kristallogr., 166, 63-71 (1984)                        |
| 7 |      |                         |                                                                              |                                                           |
| 1 | DDR  | Sigma-1                 | $[Al-Si-O]$ -DDR                                                             | Stud. Surf. Sci. Catal., 37, 57-64 (1988)                 |
| 8 |      |                         |                                                                              |                                                           |
| 1 | EAB  | *TMA-E                  | $[(TMA^+)_2Na_7(H_2O)_{26}] [Al_9Si_{27}O_{72}]$ -EAB                        | J. Solid State Chem., 37, 204-218 (1981)                  |
| 9 |      |                         |                                                                              |                                                           |
| 2 | EDI  | *Edingtonite            | $[Ba(H_2O)_4]_2 [Al_2Si_5O_{10}]_2$ -EDI                                     | Acta Crystallogr., B32, 1623-1627 (1976)                  |
| 0 |      |                         |                                                                              |                                                           |
| 2 | EMT  | *EMC-2                  | $[Na_{21}(18-crown-6)_4] [Al_{22}Si_{75}O_{192}]$ -EMT                       | Microporous Materials, 2, 269-280 (1994)                  |
| 1 |      |                         |                                                                              |                                                           |
| 2 | EON  | *ECR-1                  | $[Na_{10.97}Ca_{0.38}(H_2O)_{35.0}] [Al_xSi_{60-x}O_{120}]$ -EON(x=3.6-11.4) | Chem. Mater., 18, 76-84 (2006)                            |
| 2 |      |                         |                                                                              |                                                           |
| 2 | EPI  | *Epistilbite            | $[Ca_3(H_2O)_{16}] [Al_6Si_{18}O_{48}]$ -EPI                                 | Mineral. Mag., 36, 480-490 (1967)                         |
| 3 |      |                         |                                                                              |                                                           |
| 2 | ERI  | *Erionite               | $[(Ca,Na_2)_{3.5}K_2(H_2O)_{27}] [Al_9Si_{27}O_{72}]$ -ERI                   | Proc. 3rd Int. Conf. Molecular Sieves, , pp. 94-99 (1973) |
| 4 |      |                         |                                                                              |                                                           |
| 2 | ESV  | *ERS-7                  | $[H_{5.06}Na_{0.07}] [Al_{5.13}Si_{42.87}O_{96}]$ -ESV                       | Proc. 12th Int. Zeolite Conf., I, pp. 541-548 (1999)      |
| 5 |      |                         |                                                                              |                                                           |

|   |     |                   |                                                                                                                                                         |                                                  |
|---|-----|-------------------|---------------------------------------------------------------------------------------------------------------------------------------------------------|--------------------------------------------------|
| 2 | ETV | *EMM-37           | $[\text{BDMP}   [\text{Si}_{12}\text{Al}_2\text{O}_{28}] \text{-ETV}$                                                                                   | Inorg. Chem, 58, 12854-12858 (2019)              |
| 6 |     |                   |                                                                                                                                                         |                                                  |
| 2 | EUO | *EU-1             | $[\text{Na}_{3.6}(\text{H}_2\text{O})_{26}   [\text{Al}_{3.6}\text{Si}_{108.4}\text{O}_{224}] \text{-EUO}$                                              | Zeolites, 8, 74-76 (1988)                        |
| 7 |     |                   |                                                                                                                                                         |                                                  |
| 2 | FAR | *Farneseite       | $[(\text{Na},\text{K})_{46}\text{Ca}_{10}(\text{SO}_4)_{12}(\text{H}_2\text{O})_6   [\text{Al}_{42}\text{Si}_{42}\text{O}_{168}] \text{-FAR}$           | Eur. J. Mineral., 17, 839-846 (2005)             |
| 8 |     |                   |                                                                                                                                                         |                                                  |
| 2 | FAU | *Faujasite        | $[(\text{Ca},\text{Mg},\text{Na}_2)_{29}(\text{H}_2\text{O})_{240}   [\text{Al}_{58}\text{Si}_{134}\text{O}_{384}] \text{-FAU}$                         | Am. Mineral., 49, 697-704 (1964)                 |
| 9 |     |                   |                                                                                                                                                         |                                                  |
| 3 | FER | *Ferrierite       | $[\text{Mg}_2\text{Na}_2(\text{H}_2\text{O})_{18}   [\text{Al}_6\text{Si}_{30}\text{O}_{72}] \text{-FER}$                                               | Acta Crystallogr., 21, 983-990 (1966)            |
| 0 |     |                   |                                                                                                                                                         |                                                  |
| 3 | FRA | *Franzinite       | $[(\text{Na},\text{K})_{30}\text{Ca}_{10}(\text{SO}_4)_{10}(\text{H}_2\text{O})_2   [\text{Al}_{30}\text{Si}_{30}\text{O}_{120}] \text{-FRA}$           | Can. Mineral., 38, 657-668 (2000)                |
| 1 |     |                   |                                                                                                                                                         |                                                  |
| 3 | GIS | *Gismondine       | $[\text{Ca}_4(\text{H}_2\text{O})_{16}   [\text{Al}_8\text{Si}_8\text{O}_{32}] \text{-GIS}$                                                             | Adv. Chem. Ser. , 101, 250-258 (1971)            |
| 2 |     |                   |                                                                                                                                                         |                                                  |
| 3 | GIU | *Giuseppettite    | $[\text{Na}_{42}\text{K}_{16}\text{Ca}_6(\text{SO}_4)_{10}\text{Cl}_2(\text{H}_2\text{O})_5   [\text{Si}_{48}\text{Al}_{48}\text{O}_{192}] \text{-GIU}$ | Microporous Mesoporous Mat., 73, 129-136 (2004)  |
| 3 |     |                   |                                                                                                                                                         |                                                  |
| 3 | GME | natural gmelinite | $[\text{Na}_{6.92}\text{Ca}_{0.45}\text{H}_2\text{O}_x   [\text{Al}_{7.6}\text{Si}_{16.4}\text{O}_{48}] \text{-GME}$                                    | J. Phys. Chem. B, 104, 4074-4079 (2000)          |
| 4 |     |                   |                                                                                                                                                         |                                                  |
| 3 | GOO | *Goosecreekite    | $[\text{Ca}_4(\text{H}_2\text{O})_{20}  _{1/2}   [\text{Al}_8\text{Si}_{24}\text{O}_{64}]_{1/2} \text{-GOO}$                                            | Am. Mineral., 71, 1494-1501 (1986)               |
| 5 |     |                   |                                                                                                                                                         |                                                  |
| 3 | HEU | *Heulandite       | $[\text{Ca}_4(\text{H}_2\text{O})_{24}   [\text{Al}_8\text{Si}_{28}\text{O}_{72}] \text{-HEU}$                                                          | Tschermaks Min. Petr. Mitt., 18, 129-146 (1972)  |
| 6 |     |                   |                                                                                                                                                         |                                                  |
| 3 | IFR | MCM-58            | $[\text{Al-Si-O}] \text{-IFR}$                                                                                                                          | WOP 9511196,(1995)                               |
| 7 |     |                   |                                                                                                                                                         |                                                  |
| 3 | ITE | Mu-14             | $[\text{Al}_x\text{Si}_{64-x}\text{O}_{128}] \text{-ITE (x=2-3.4)}$                                                                                     | Microporous Mesoporous Mat., 38, 177-185 (2000)  |
| 8 |     |                   |                                                                                                                                                         |                                                  |
| 3 | IWV | *ITQ-27           | $[\text{Al}_5\text{Si}_{147}\text{O}_{304}] \text{-IWV}$                                                                                                | J. Am. Chem. Soc., 128, 8862-8867 (2006)         |
| 9 |     |                   |                                                                                                                                                         |                                                  |
| 4 | JBW | *Na-J             | $[\text{Na}_3(\text{H}_2\text{O})_{15}  _4   [\text{Al}_3\text{Si}_3\text{O}_{12}]_4 \text{-JBW}$                                                       | Zeolites, 2, 162-166 (1982)                      |
| 0 |     |                   |                                                                                                                                                         |                                                  |
| 4 | KFI | *ZK-5             | $[\text{Na}_{30}(\text{H}_2\text{O})_{98}   [\text{Al}_{30}\text{Si}_{66}\text{O}_{192}] \text{-KFI}$                                                   | Z. Kristallogr., 121, 211-219 (1965)             |
| 1 |     |                   |                                                                                                                                                         |                                                  |
| 4 | LAU | *Laumontite       | $[\text{Ca}_4(\text{H}_2\text{O})_{16}   [\text{Al}_8\text{Si}_{16}\text{O}_{48}] \text{-LAU}$                                                          | Adv. Chem. Ser. , 101, 259-265 (1971)            |
| 2 |     |                   |                                                                                                                                                         |                                                  |
| 4 | LEV | *Levyne           | $[\text{Ca}_2(\text{H}_2\text{O})_{50}   [\text{Al}_{18}\text{Si}_{36}\text{O}_{108}] \text{-LEV}$                                                      | Tschermaks Min. Petr. Mitt., 22, 117-129 (1975)  |
| 3 |     |                   |                                                                                                                                                         |                                                  |
| 4 | LIO | *Liohtite         | $[\text{Ca}_8(\text{K},\text{Na})_{16}(\text{SO}_4)_2\text{Cl}_4   [\text{Al}_{18}\text{Si}_{18}\text{O}_{72}] \text{-LIO}$                             | Can. Mineral., 34, 1021-1030 (1996)              |
| 4 |     |                   |                                                                                                                                                         |                                                  |
| 4 | LIT | *Lithosite        | $[\text{K}_{12}  _2   [\text{Al}_{16}\text{Si}_{32}\text{O}_{88}\text{OH}_{16}]_2 \text{-LIT}$                                                          | Sov. Phys. Dokl., 31, 941-942 (1986)             |
| 5 |     |                   |                                                                                                                                                         |                                                  |
| 4 | LOS | *Losod            | $[\text{Na}_{12}(\text{H}_2\text{O})_{18}   [\text{Al}_{12}\text{Si}_{12}\text{O}_{48}] \text{-LOS}$                                                    | Ph.D. Thesis, ETH, Zurich, Switzerland, , (1988) |
| 6 |     |                   |                                                                                                                                                         |                                                  |
| 4 | LTA | *Linde Type A     | $[\text{Na}_{12}(\text{H}_2\text{O})_{278}  _8   [\text{Al}_{12}\text{Si}_{12}\text{O}_{48}]_8 \text{-LTA}$                                             | Z. Kristallogr., 133, 134-149 (1971)             |
| 7 |     |                   |                                                                                                                                                         |                                                  |

|   |     |                |                                                                             |                                                       |
|---|-----|----------------|-----------------------------------------------------------------------------|-------------------------------------------------------|
| 4 | LTJ | *Linde Type J  | $[X_8(H_2O)_4][Si_8Al_6O_{32}]$ -LTJ                                        | Microporous Mesoporous Mat., 143, 398-400 (2011)      |
| 8 |     |                |                                                                             |                                                       |
| 4 | LTL | *Linde Type L  | $[K_6Na_3(H_2O)_{21}][Al_5Si_{17}O_{72}]$ -LTL                              | Z. Kristallogr., 128, 352-370 (1969)                  |
| 9 |     |                |                                                                             |                                                       |
| 5 | LTN | *Linde Type N  | $[Na_{384}(H_2O)_{518}][Al_{384}Si_{384}O_{1536}]$ -LTN                     | Z. Kristallogr., 160, 313-316 (1982)                  |
| 0 |     |                |                                                                             |                                                       |
| 5 | MAR | *Marinellite   | $[Na_{31}K_{11}Ca_6(SO_4)_8Cl_2(H_2O)_{3.4}][Al_{36}Si_{36}O_{144}]$ -MAR   | Eur. J. Mineral., 15, 1019-1027 (2003)                |
| 1 |     |                |                                                                             |                                                       |
| 5 | MAZ | *Mazzite       | $[(Na_2K_2CaMg)_5(H_2O)_{28}][Al_{10}Si_{26}O_{72}]$ -MAZ                   | Rend. Soc. Ital. Mineral. Petrol., 31, 599-612 (1975) |
| 2 |     |                |                                                                             |                                                       |
| 5 | MEI | *ZSM-18        | $[Na_x(H_2O)_{28}][Al_xSi_{34-x}O_{68}]$ -MEI (x=2.1-5.7)                   | Science, 247, 1319-1321 (1990)                        |
| 3 |     |                |                                                                             |                                                       |
| 5 | MER | RMA-2          | $[Rb-H_2O_x][Al_{6.6}Si_{25.4}O_{64}]$ -MER                                 | Microporous Mesoporous Mat., 114, 495-506 (2008)      |
| 4 |     |                |                                                                             |                                                       |
| 5 | MFI | *ZSM-5         | $[Na_x(H_2O)_{16}][Al_xSi_{96-x}O_{192}]$ -MFI (x<27)                       | J. Phys. Chem., 85, 2238-2243 (1981)                  |
| 5 |     |                |                                                                             |                                                       |
| 5 | MFS | *ZSM-57        | $[H_{1.5}][Al_{1.5}Si_{34.5}O_{72}]$ -MFS                                   | Zeolites, 10, 293-296 (1990)                          |
| 6 |     |                |                                                                             |                                                       |
| 5 | MON | *Montesommaite | $[(K,Na)_{4.5}(H_2O)_5][Al_{4.5}Si_{11.5}O_{32}]$ -MON                      | Am. Mineral., 75, 1415-1420 (1990)                    |
| 7 |     |                |                                                                             |                                                       |
| 5 | MOZ | *ZSM-10        | $[K_{24}][Al_{24}Si_{84}O_{216}]$ -MOZ                                      | Z. Kristallogr., 221, 260-265 (2006)                  |
| 8 |     |                |                                                                             |                                                       |
| 5 | MRT | *ZSM-43        | $[Cs_{2.4}K_{0.35}(H_2O)_{10.6}][Al_{3.8}Si_{20.2}O_{48}]$ -MRT             | Inorg. Chem, 56, 8856-8864 (2017)                     |
| 9 |     |                |                                                                             |                                                       |
| 6 | MSE | *MCM-68        | $[Al_{11.4}Si_{100.6}O_{224}]$ -MSE                                         | J. Phys. Chem. B, 110, 2045-2050 (2006)               |
| 0 |     |                |                                                                             |                                                       |
| 6 | MSO | *MCM-61        | $[K_{6.3}(18\text{-crown-6})_3]_{1/2}[Al_{6.3}Si_{83.7}O_{180}]_{1/2}$ -MSO | Microporous Mesoporous Mat., 31, 61-73 (1999)         |
| 1 |     |                |                                                                             |                                                       |
| 6 | MTT | *ZSM-23        | $[Na_x(H_2O)_4][Al_xSi_{24-x}O_{48}]$ -MTT(x<2)                             | private communication, (0)                            |
| 2 |     |                |                                                                             |                                                       |
| 6 | MTW | *ZSM-12        | $[Na_x(H_2O)_4]_2[Al_xSi_{28-x}O_{56}]_2$ -MTW(x<2.5)                       | J. Phys. Chem., 94, 3718-3721 (1990)                  |
| 3 |     |                |                                                                             |                                                       |
| 6 | MWF | *ZSM-25        | $[(TEA^+)_{36}(H_2O)_{812}][Al_{334}Si_{1106}O_{2880}]$ -MWF                | Nature, 524, 74-78 (2015)                             |
| 4 |     |                |                                                                             |                                                       |
| 6 | MW  | SSZ-25         | $[Al-Si-O]$ -MWW                                                            | Chemistry - A European Journal, 7, 1990-2001 (2001)   |
| 5 | W   |                |                                                                             |                                                       |
| 6 | NAT | *Natrolite     | $[Na_8(H_2O)_8]_2[Al_8Si_{12}O_{40}]_2$ -NAT                                | Z. Kristallogr., 113, 430-444 (1960)                  |
| 6 |     |                |                                                                             |                                                       |
| 6 | NES | *NU-87         | $[H_8(H_2O)_x]_{1/2}[Al_8Si_{128}O_{272}]_{1/2}$ -NES                       | Nature, 353, 417-420 (1991)                           |
| 7 |     |                |                                                                             |                                                       |
| 6 | NON | CF-3           | $[Al-Si-O]$ -NON                                                            | J. Incl. Phenom., 4, 121-127 (1986)                   |
| 8 |     |                |                                                                             |                                                       |
| 6 | OFF | *Offretite     | $[(Ca,Mg)_{1.5}(H_2O)_{14}][Al_4Si_{14}O_{36}]$ -OFF                        | Acta Crystallogr., B28, 825-834 (1972)                |
| 9 |     |                |                                                                             |                                                       |

|   |     |                        |                                                                                                                                                                            |                                                    |
|---|-----|------------------------|----------------------------------------------------------------------------------------------------------------------------------------------------------------------------|----------------------------------------------------|
| 7 | PAR | *Partheite             | $[\text{Ca}_6(\text{H}_2\text{O})_{16}][\text{Al}_{16}\text{Si}_{16}\text{O}_{60}(\text{OH})_8]$ --PAR                                                                     | Z. Kristallogr., 169, 165-175 (1984)               |
| 0 |     |                        |                                                                                                                                                                            |                                                    |
| 7 | PAU | *Paulingite            | $[(\text{Ca},\text{K}_2,\text{Na}_2)_{76}(\text{H}_2\text{O})_{700}][\text{Al}_{152}\text{Si}_{520}\text{O}_{1344}]$ --PAU                                                 | Science, 154, 1004-1007 (1966)                     |
| 1 |     |                        |                                                                                                                                                                            |                                                    |
| 7 | PHI | *Phillipsite           | $[\text{K}_4(\text{Ca},\text{Na}_2)_4(\text{H}_2\text{O})_{24}]_{1/2}[\text{Al}_{12}\text{Si}_{20}\text{O}_{64}]_{1/2}$ --PHI                                              | Acta Crystallogr., B30, 2426-2433 (1974)           |
| 2 |     |                        |                                                                                                                                                                            |                                                    |
| 7 | PTY | *PST-30, calcined      | $[\text{H}_{0.8}(\text{H}_2\text{O})_{4.2}][\text{Al}_{0.8}\text{Si}_{9.2}\text{O}_{20}]$ --PTY                                                                            | Angew. Chem. Int. Ed., 58, 13845-13848 (2019)      |
| 3 |     |                        |                                                                                                                                                                            |                                                    |
| 7 | PWN | *PST-29                | $[(\text{Me}_2\text{-DABCO}^+)_{21}\text{Na}_{32}(\text{H}_2\text{O})_{120}][\text{Al}_{54}\text{Si}_{186}\text{O}_{480}]$ --PWN                                           | Chem. Mater., 30, 6619-6623 (2018)                 |
| 4 |     |                        |                                                                                                                                                                            |                                                    |
| 7 | PWO | *PST-21                | $[\text{H}_{1.8}(\text{H}_2\text{O})_{6.9}][\text{Al}_{1.8}\text{Si}_{18.2}\text{O}_{40}]$ --PWO                                                                           | Angew. Chem. Int. Ed., 57, 2199-2203 (2018)        |
| 5 |     |                        |                                                                                                                                                                            |                                                    |
| 7 | PWW | *PST-22                | $[\text{H}_{3.3}(\text{H}_2\text{O})_{13.8}][\text{Al}_{3.3}\text{Si}_{36.7}\text{O}_{80}]$ --PWW                                                                          | Angew. Chem. Int. Ed., 57, 2199-2203 (2018)        |
| 6 |     |                        |                                                                                                                                                                            |                                                    |
| 7 | RHO | *Rho                   | $[(\text{Na},\text{Cs})_{12}(\text{H}_2\text{O})_{44}][\text{Al}_{12}\text{Si}_{96}\text{O}_{96}]$ --RHO                                                                   | Proc. 6th Int. Zeolite Conf., , pp. 812-822 (1984) |
| 7 |     |                        |                                                                                                                                                                            |                                                    |
| 7 | RTH | SSZ-50 ((Al-Si-O)-RTH) | $[\text{Al-Si-O}]$ --RTH                                                                                                                                                   | J. Solid State Chem., 167, 289-298 (2002)          |
| 8 |     |                        |                                                                                                                                                                            |                                                    |
| 7 | RUT | Al-Nu-1                | $[\text{Al-Si-O}]$ --RUT                                                                                                                                                   | Zeolites, 10, 642-649 (1990)                       |
| 9 |     |                        |                                                                                                                                                                            |                                                    |
| 8 | SFW | *SSZ-52                | $[(\text{DEDMAB}^+)_{8}\text{Na}_6(\text{H}_2\text{O})_{18}][\text{Al}_{12}\text{Si}_{96}\text{O}_{216}]$ --SFW                                                            | J. Am. Chem. Soc., 135, 10519-10524 (2013)         |
| 0 |     |                        |                                                                                                                                                                            |                                                    |
| 8 | SOD | *Sodalite              | $[\text{Na}_8\text{Cl}_2][\text{Al}_6\text{Si}_6\text{O}_{24}]$ --SOD                                                                                                      | Acta Crystallogr., 23, 434-436 (1967)              |
| 1 |     |                        |                                                                                                                                                                            |                                                    |
| 8 | STI | *Stilbite              | $[\text{Na}_4\text{Ca}_6(\text{H}_2\text{O})_{56}]_{1/2}[\text{Al}_{26}\text{Si}_{52}\text{O}_{144}]_{1/2}$ --STI                                                          | Acta Crystallogr., B27, 833-841 (1971)             |
| 2 |     |                        |                                                                                                                                                                            |                                                    |
| 8 | SZR | *SUZ-4                 | $[\text{K}_4][\text{Al}_4\text{Si}_{32}\text{O}_{72}]$ --SZR                                                                                                               | Z. Kristallogr., 221, 689-698 (2006)               |
| 3 |     |                        |                                                                                                                                                                            |                                                    |
| 8 | TER | *Terranovaite          | $[\text{Na}_{4.2}\text{K}_{0.2}\text{Mg}_{0.2}\text{Ca}_{3.7}(\text{H}_2\text{O})_{29}][\text{Al}_{12.3}\text{Si}_{67.7}\text{O}_{160}]$ --TER                             | Am. Mineral., 82, 423-429 (1997)                   |
| 4 |     |                        |                                                                                                                                                                            |                                                    |
| 8 | THO | *Thomsonite            | $[\text{NaCa}_2(\text{H}_2\text{O})_6]_4[\text{Al}_5\text{Si}_5\text{O}_{20}]_4$ --THO                                                                                     | Zeolites, 5, 74-80 (1985)                          |
| 5 |     |                        |                                                                                                                                                                            |                                                    |
| 8 | TOL | *Toukrite-like mineral | $[\text{Na}_{31.1}\text{Ca}_{15.94}\text{K}_{0.96}\text{Cl}_6(\text{SO}_4)_{9.3}(\text{SO}_3)_{0.7}][\text{Al}_{36}\text{Si}_{36}\text{O}_{144}]$ --TOL                    | Crystallogr. Reports, 4, 635-642 (2004)            |
| 6 |     |                        |                                                                                                                                                                            |                                                    |
| 8 | TON | *Theta-1               | $[\text{Na}_n(\text{H}_2\text{O})_4][\text{Al}_x\text{Si}_{24-x}\text{O}_{48}]$ --TON (x<2)                                                                                | Nature, 312, 533-534 (1984)                        |
| 7 |     |                        |                                                                                                                                                                            |                                                    |
| 8 | TSC | *Tschouml;rtnerite     | $[\text{Ca}_{64}(\text{K}_2,\text{Ca},\text{Sr},\text{Ba})_{48}\text{Cu}_{48}(\text{OH})_{128}(\text{H}_2\text{O})_x][\text{Al}_{192}\text{Si}_{192}\text{O}_{768}]$ --TSC | Am. Mineral., 83, 607-617 (1998)                   |
| 8 |     |                        |                                                                                                                                                                            |                                                    |
| 8 | TUN | *TNU-9                 | $[\text{H}_{9.3}][\text{Al}_{9.3}\text{Si}_{182.7}\text{O}_{384}]$ --TUN                                                                                                   | Nature, 444, 79-81 (2006)                          |
| 9 |     |                        |                                                                                                                                                                            |                                                    |
| 9 | UFI | *UZM-5                 | $[\text{K}_8][\text{Al}_8\text{Si}_{56}\text{O}_{128}]$ --UFI                                                                                                              | Angew. Chem. Int. Ed., 42, 1737-1740 (2003)        |
| 0 |     |                        |                                                                                                                                                                            |                                                    |
| 9 | WEN | *Wenkite               | $[\text{Ba}_4(\text{Ca},\text{Na}_2)_3(\text{SO}_4)_3\text{H}_2\text{O}][\text{Al}_6\text{Si}_{12}\text{O}_{30}(\text{OH})_2]$ --WEN                                       | Acta Crystallogr., B30, 1262-1266 (1974)           |
| 1 |     |                        |                                                                                                                                                                            |                                                    |



---

|   |     |               |                                                                                                 |                                          |
|---|-----|---------------|-------------------------------------------------------------------------------------------------|------------------------------------------|
| 9 | YFI | *YNU-5        | $[\text{K}_{6.3}(\text{H}_2\text{O})_{0.72}][\text{Al}_{12}\text{Si}_{108}\text{O}_{240}]$ -YFI | J. Am. Chem. Soc., 139, 7989-7997 (2017) |
| 2 |     |               |                                                                                                 |                                          |
| 9 | YUG | *Yugawaralite | $[\text{Ca}_2(\text{H}_2\text{O})_6][\text{Al}_4\text{Si}_{12}\text{O}_{32}]$ -YUG              | Acta Crystallogr., B25, 1183-1190 (1969) |
| 3 |     |               |                                                                                                 |                                          |

---

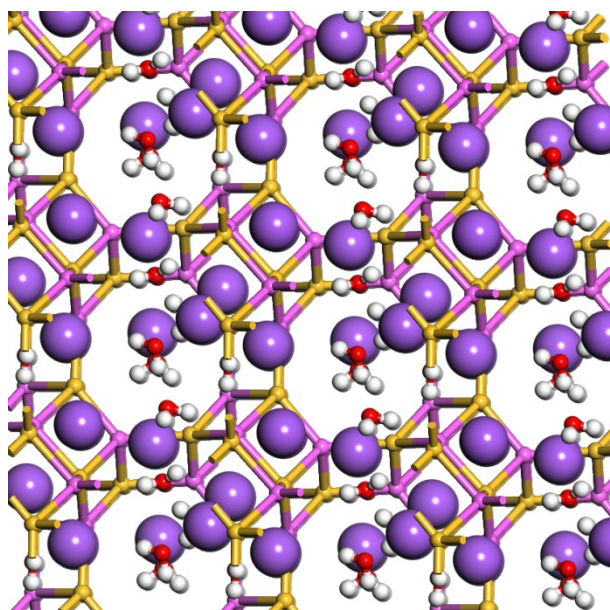

**Figure S7 | The structure of  $\text{Si}_6\text{Al}_6\text{O}_{24}\text{Na}_6(\text{H}_2\text{O})_6$  in CHA-type structural skeleton.** The formation Gibbs free energy of this structure with respect to the energies of quartz- $\text{SiO}_2$ ,  $\alpha\text{-Al}_2\text{O}_3$ ,  $\text{H}_2\text{O}$  and  $\text{NaOH}(\text{aq})$  compositions at common hydrothermal conditions of 200 °C and 15.53 bar is -0.17 eV/f.u. The structure is the most stable configuration via DFT calculation from a number of manually configured structures for  $\text{Na}/\text{H}_2\text{O}$  in CHA. The purple ball represents the Na atom. Structural coordinates can be found in Supplementary Structural Coordinates.

---

## Supplementary References

(1) Carnevali, S.; Proust, C.; Soucille, M. Unsteady aspects of sodium-water-air reaction. *Chem. Eng. Res. Des.* **2013**, *91*(4), 633-639.

(2) <http://www.iza-structure.org/databases/>.

(3) Bennett, J. M.; Kirchner, R. M. The Structure Of Calcined Alpo4-31 - a New Framework Topology Containing One-Dimensional 12-Ring Pores. *Zeolites* **1992**, *12*(4), 338-342.

(4) Li, J. Y.; Yu, J. H.; Wang, K. X.; Zhu, G. H.; Xu, R. R. A simulation study on the topotactic transformations from aluminophosphate AlPO4-21 to AlPO4-25. *Inorg. Chem.* **2001**, *40*(23), 5812-5817.

(5) Zhong, J.; Han, J.; Wei, Y.; Tian, P.; Guo, X.; Song, C.; Liu, Z. Recent advances of the nano-hierarchical SAPO-34 in the methanol-to-olefin (MTO) reaction and other applications. *Catal. Sci. Technol.* **2017**, *7*(21), 4905-4923.

(6) Zahedi-Niaki, M. H.; Xu, G. Y.; Meyer, H.; Fyfe, C. A.; Kaliaguine, S. Synthesis and characterization of AlPO4-36: a novel aluminophosphate molecular sieve with ATS structure. *Microporous Mesoporous Mat.* **1999**, *32*(3), 241-250.

## Supplementary Structural Coordinates (.arc format)

### GM in Table S6 at $r_s = 3$ for AIPO

!BIOSYM archive 2

PBC=ON

|       | Energy       | 0           | 0.0178      | -235.002076 | P2_1         |              |
|-------|--------------|-------------|-------------|-------------|--------------|--------------|
| IDATE |              |             |             |             |              |              |
| PBC   | 9.85163150   | 8.73842931  | 8.73968880  | 61.14332291 | 116.00628845 | 116.02522647 |
| P     | 4.762720661  | 7.305300015 | 0.153341369 | CORE        | 1 P P        | 0.0000 1     |
| P     | 0.293214635  | 5.995489220 | 1.109812075 | CORE        | 2 P P        | 0.0000 2     |
| P     | 6.043988105  | 3.079282793 | 2.545793440 | CORE        | 3 P P        | 0.0000 3     |
| P     | 1.514198469  | 1.644760766 | 3.516968462 | CORE        | 4 P P        | 0.0000 4     |
| P     | 3.480184831  | 6.630377058 | 5.073441007 | CORE        | 5 P P        | 0.0000 5     |
| P     | -1.133013028 | 5.118118672 | 5.926495812 | CORE        | 6 P P        | 0.0000 6     |
| Al    | 7.036543854  | 5.224089009 | 0.555352883 | CORE        | 7 Al Al      | 0.0000 7     |
| Al    | 3.724678761  | 1.211205657 | 1.301664519 | CORE        | 8 Al Al      | 0.0000 8     |
| Al    | 4.410150511  | 8.708562150 | 2.941233518 | CORE        | 9 Al Al      | 0.0000 9     |
| Al    | 1.133367386  | 4.745759555 | 3.813030781 | CORE        | 10 Al Al     | 0.0000 10    |
| Al    | 5.608958855  | 4.348835218 | 5.347127182 | CORE        | 11 Al Al     | 0.0000 11    |
| Al    | -1.405792688 | 8.244479731 | 6.224728434 | CORE        | 12 Al Al     | 0.0000 12    |
| O     | 6.173632596  | 6.692455076 | 0.122742579 | CORE        | 13 O O       | 0.0000 13    |
| O     | -1.187217809 | 5.645826507 | 0.990967852 | CORE        | 14 O O       | 0.0000 14    |
| O     | 0.441579355  | 7.430296326 | 1.645434767 | CORE        | 15 O O       | 0.0000 15    |
| O     | 4.994806195  | 2.320419715 | 1.734543361 | CORE        | 16 O O       | 0.0000 16    |
| O     | 4.333364931  | 7.570760369 | 1.601472374 | CORE        | 17 O O       | 0.0000 17    |
| O     | 6.245618223  | 4.474793256 | 1.936862820 | CORE        | 18 O O       | 0.0000 18    |
| O     | 0.986450212  | 5.030180229 | 2.083346893 | CORE        | 19 O O       | 0.0000 19    |
| O     | 2.234982995  | 1.559817260 | 2.166644167 | CORE        | 20 O O       | 0.0000 20    |
| O     | 7.383690216  | 2.326473986 | 2.518095353 | CORE        | 21 O O       | 0.0000 21    |
| O     | -3.785007080 | 9.104378330 | 3.321752811 | CORE        | 22 O O       | 0.0000 22    |
| O     | 5.547114709  | 3.228585023 | 3.991164305 | CORE        | 23 O O       | 0.0000 23    |
| O     | 1.608120231  | 3.074986882 | 4.075108498 | CORE        | 24 O O       | 0.0000 24    |
| O     | 3.620053818  | 7.964899951 | 4.325922258 | CORE        | 25 O O       | 0.0000 25    |
| O     | -0.429681177 | 5.042014562 | 4.564628301 | CORE        | 26 O O       | 0.0000 26    |
| O     | -1.645534930 | 8.535190542 | 4.507005131 | CORE        | 27 O O       | 0.0000 27    |
| O     | 2.324225095  | 5.817265161 | 4.494745982 | CORE        | 28 O O       | 0.0000 28    |
| O     | 4.795261871  | 5.846509052 | 4.932550823 | CORE        | 29 O O       | 0.0000 29    |
| O     | -2.590199159 | 4.701470631 | 5.754345817 | CORE        | 30 O O       | 0.0000 30    |
| O     | -1.059463512 | 6.546760952 | 6.485871357 | CORE        | 31 O O       | 0.0000 31    |
| O     | 3.187286046  | 6.907029576 | 6.551191998 | CORE        | 32 O O       | 0.0000 32    |
| O     | 4.785200632  | 3.604189165 | 6.711086953 | CORE        | 33 O O       | 0.0000 33    |
| O     | -0.435729632 | 4.166253040 | 6.909425861 | CORE        | 34 O O       | 0.0000 34    |
| O     | -0.056627576 | 9.157829617 | 6.838316363 | CORE        | 35 O O       | 0.0000 35    |
| O     | -2.886540056 | 8.696232723 | 7.057379801 | CORE        | 36 O O       | 0.0000 36    |

end

end

### GM in Table S6 at $r_s = 3$ for SiO<sub>2</sub>

!BIOSYM archive 2

PBC=ON

|       | Energy       | 0           | 0.0139      | -250.577299  | C2          |              |
|-------|--------------|-------------|-------------|--------------|-------------|--------------|
| IDATE |              |             |             |              |             |              |
| PBC   | 7.29789875   | 10.21813670 | 8.73822042  | 106.98924532 | 83.35826289 | 110.47720179 |
| Si    | 0.062759019  | 2.709944903 | 0.267793407 | CORE         | 1 Si Si     | 0.0000 1     |
| Si    | -1.724931888 | 7.495459794 | 0.269832544 | CORE         | 2 Si Si     | 0.0000 2     |
| Si    | 2.550251242  | 0.916020652 | 0.528166528 | CORE         | 3 Si Si     | 0.0000 3     |
| Si    | 0.764721806  | 5.701744229 | 0.526007015 | CORE         | 4 Si Si     | 0.0000 4     |
| Si    | 5.011218586  | 1.898140655 | 2.157830624 | CORE         | 5 Si Si     | 0.0000 5     |

|    |              |              |             |      |          |        |    |
|----|--------------|--------------|-------------|------|----------|--------|----|
| Si | 3.223002737  | 6.682217460  | 2.158687693 | CORE | 6 Si Si  | 0.0000 | 6  |
| Si | 6.301861077  | -0.347925211 | 3.887499639 | CORE | 7 Si Si  | 0.0000 | 7  |
| Si | 4.514521591  | 4.438720888  | 3.888650102 | CORE | 8 Si Si  | 0.0000 | 8  |
| Si | 1.504724096  | 0.525550547  | 5.518620967 | CORE | 9 Si Si  | 0.0000 | 9  |
| Si | -0.284887416 | 5.311812462  | 5.522152512 | CORE | 10 Si Si | 0.0000 | 10 |
| Si | 3.995446804  | -1.275591990 | 5.779164178 | CORE | 11 Si Si | 0.0000 | 11 |
| Si | 2.206873403  | 3.510686475  | 5.777524066 | CORE | 12 Si Si | 0.0000 | 12 |
| O  | 1.024758213  | 1.464894015  | 0.678992160 | CORE | 13 O O   | 0.0000 | 13 |
| O  | -0.760524948 | 6.251058540  | 0.676926901 | CORE | 14 O O   | 0.0000 | 14 |
| O  | -1.029572034 | 8.880520214  | 0.774474491 | CORE | 15 O O   | 0.0000 | 15 |
| O  | 0.760835009  | 4.094039042  | 0.771421177 | CORE | 16 O O   | 0.0000 | 16 |
| O  | 5.909630634  | 2.517649506  | 0.953722987 | CORE | 17 O O   | 0.0000 | 17 |
| O  | 4.123075192  | 7.300037700  | 0.955721306 | CORE | 18 O O   | 0.0000 | 18 |
| O  | 3.501965672  | 1.631674223  | 1.619860466 | CORE | 19 O O   | 0.0000 | 19 |
| O  | 1.714402943  | 6.417103450  | 1.619134778 | CORE | 20 O O   | 0.0000 | 20 |
| O  | 5.659746917  | 0.499071888  | 2.660582425 | CORE | 21 O O   | 0.0000 | 21 |
| O  | 3.870716685  | 5.283163790  | 2.661245215 | CORE | 22 O O   | 0.0000 | 22 |
| O  | 4.944245063  | 2.958066772  | 3.385317833 | CORE | 23 O O   | 0.0000 | 23 |
| O  | 3.154710843  | 7.743131482  | 3.384803987 | CORE | 24 O O   | 0.0000 | 24 |
| O  | 0.317367657  | 0.440039439  | 4.426634725 | CORE | 25 O O   | 0.0000 | 25 |
| O  | -1.471636482 | 5.228964922  | 4.429198075 | CORE | 26 O O   | 0.0000 | 26 |
| O  | 5.217040238  | -0.471733159 | 5.090936994 | CORE | 27 O O   | 0.0000 | 27 |
| O  | 3.427943048  | 4.315699350  | 5.090555323 | CORE | 28 O O   | 0.0000 | 28 |
| O  | 0.771173696  | 4.099076280  | 5.277912179 | CORE | 29 O O   | 0.0000 | 29 |
| O  | 2.562130726  | -0.685822552 | 5.274500527 | CORE | 30 O O   | 0.0000 | 30 |
| O  | 2.295525638  | 1.940393004  | 5.364820430 | CORE | 31 O O   | 0.0000 | 31 |
| O  | 0.508993801  | 6.725044097  | 5.371295499 | CORE | 32 O O   | 0.0000 | 32 |
| O  | 0.863117318  | 0.412224063  | 7.011736961 | CORE | 33 O O   | 0.0000 | 33 |
| O  | -0.928371467 | 5.198140484  | 7.014225564 | CORE | 34 O O   | 0.0000 | 34 |
| O  | 4.121647128  | -1.098561816 | 7.391094856 | CORE | 35 O O   | 0.0000 | 35 |
| O  | 2.337127775  | 3.686498168  | 7.389292680 | CORE | 36 O O   | 0.0000 | 36 |

end

end

**GM in Table S6 at  $r_s = 3$  for  $[\text{SiAlO}_4\text{H}]$**

!BIOSYM archive 2

PBC=ON

|       | Energy       | 0            | 0.0191      | -262.731127  | P1                       |
|-------|--------------|--------------|-------------|--------------|--------------------------|
| !DATE |              |              |             |              |                          |
| PBC   | 7.82032448   | 9.96525926   | 7.90834068  | 109.77239805 | 82.94089253 102.86903505 |
| Si    | 3.901614918  | 6.649223713  | 2.700695738 | CORE         | 1 Si Si 0.0000 1         |
| Si    | 0.939869972  | 6.210616506  | 3.704706022 | CORE         | 2 Si Si 0.0000 2         |
| Si    | 6.798770125  | -0.373185966 | 4.247484718 | CORE         | 3 Si Si 0.0000 3         |
| Si    | 4.871530652  | 3.752599399  | 6.936821014 | CORE         | 4 Si Si 0.0000 4         |
| Si    | 3.628780931  | 1.014751518  | 6.921397898 | CORE         | 5 Si Si 0.0000 5         |
| Si    | 5.527787513  | -1.404969244 | 6.993289928 | CORE         | 6 Si Si 0.0000 6         |
| Al    | 0.248609274  | 5.181056850  | 0.679935015 | CORE         | 7 Al Al 0.0000 7         |
| Al    | 4.798131234  | 1.282102196  | 2.486816763 | CORE         | 8 Al Al 0.0000 8         |
| Al    | 6.080023934  | 4.387066858  | 2.704883954 | CORE         | 9 Al Al 0.0000 9         |
| Al    | 2.266529478  | -0.307197600 | 4.208388257 | CORE         | 10 Al Al 0.0000 10       |
| Al    | -0.227712364 | 3.858907825  | 5.428642140 | CORE         | 11 Al Al 0.0000 11       |
| Al    | 2.271176816  | 5.313400827  | 6.364201600 | CORE         | 12 Al Al 0.0000 12       |
| O     | 3.350385631  | 2.159193210  | 0.035456184 | CORE         | 13 O O 0.0000 13         |
| O     | 0.470507934  | 7.066229582  | 0.406727977 | CORE         | 14 O O 0.0000 14         |
| O     | 1.639490437  | 4.133201480  | 0.599799534 | CORE         | 15 O O 0.0000 15         |
| O     | 6.485754801  | 4.285417687  | 0.951177585 | CORE         | 16 O O 0.0000 16         |
| O     | 5.404322497  | 0.866750893  | 0.917342145 | CORE         | 17 O O 0.0000 17         |
| O     | 3.729659223  | 6.680978791  | 1.081641055 | CORE         | 18 O O 0.0000 18         |
| O     | 0.008331322  | 5.470360971  | 2.562949090 | CORE         | 19 O O 0.0000 19         |

|   |             |              |             |      |    |   |   |        |    |
|---|-------------|--------------|-------------|------|----|---|---|--------|----|
| O | 4.658676863 | 3.088372497  | 2.651815697 | CORE | 20 | O | O | 0.0000 | 20 |
| O | 3.100490749 | 0.576955957  | 2.746876105 | CORE | 21 | O | O | 0.0000 | 21 |
| O | 5.119918674 | 5.731871737  | 3.184803069 | CORE | 22 | O | O | 0.0000 | 22 |
| O | 4.087530895 | 8.157715185  | 3.247792672 | CORE | 23 | O | O | 0.0000 | 23 |
| O | 2.497136047 | 6.062140869  | 3.298519181 | CORE | 24 | O | O | 0.0000 | 24 |
| O | 6.988394548 | 3.302487311  | 3.858744894 | CORE | 25 | O | O | 0.0000 | 25 |
| O | 5.916573618 | 0.929713941  | 3.783336343 | CORE | 26 | O | O | 0.0000 | 26 |
| O | 0.499766822 | 7.727007131  | 3.982400873 | CORE | 27 | O | O | 0.0000 | 27 |
| O | 0.553688816 | -0.066700439 | 4.089610366 | CORE | 28 | O | O | 0.0000 | 28 |
| O | 0.893695594 | 5.240120715  | 5.107773535 | CORE | 29 | O | O | 0.0000 | 29 |
| O | 2.877160911 | 0.688676981  | 5.515787133 | CORE | 30 | O | O | 0.0000 | 30 |
| O | 6.436447813 | -0.735410289 | 5.808612711 | CORE | 31 | O | O | 0.0000 | 31 |
| O | 3.629945234 | 4.314093242  | 6.069772437 | CORE | 32 | O | O | 0.0000 | 32 |
| O | 0.852570276 | 2.666193527  | 6.204609650 | CORE | 33 | O | O | 0.0000 | 33 |
| O | 6.301834790 | 4.300589174  | 6.444051549 | CORE | 34 | O | O | 0.0000 | 34 |
| O | 2.571060110 | 6.975749433  | 6.497362441 | CORE | 35 | O | O | 0.0000 | 35 |
| O | 4.871347037 | 2.101924192  | 6.766256157 | CORE | 36 | O | O | 0.0000 | 36 |
| H | 5.876187742 | 4.001452921  | 0.258261187 | CORE | 37 | H | H | 0.0000 | 37 |
| H | 0.419244316 | 7.593041836  | 1.216193764 | CORE | 38 | H | H | 0.0000 | 38 |
| H | 2.515114585 | 0.848362478  | 2.021445029 | CORE | 39 | H | H | 0.0000 | 39 |
| H | 3.781182741 | 3.463390590  | 2.505018731 | CORE | 40 | H | H | 0.0000 | 40 |
| H | 6.640330601 | 2.356542738  | 3.885362317 | CORE | 41 | H | H | 0.0000 | 41 |
| H | 1.364477866 | 1.974947041  | 5.738218954 | CORE | 42 | H | H | 0.0000 | 42 |

end

end

**GM in Table S6 at  $r_s = 3.5$  for AIPO**

!BIOSYM archive 2

PBC=ON

|       | Energy      | 0            | 0.0194      | -234.611725 | C2          |             |    |        |    |
|-------|-------------|--------------|-------------|-------------|-------------|-------------|----|--------|----|
| IDATE |             |              |             |             |             |             |    |        |    |
| PBC   | 9.73679867  | 8.45852032   | 8.73085948  | 61.05262773 | 89.82676220 | 90.02937972 |    |        |    |
| P     | 3.740866964 | 2.239830322  | 0.775992103 | CORE        | 1           | P           | P  | 0.0000 | 1  |
| P     | 0.706775056 | 6.482445820  | 0.995206311 | CORE        | 2           | P           | P  | 0.0000 | 2  |
| P     | 5.565123031 | 6.501742208  | 3.077038754 | CORE        | 3           | P           | P  | 0.0000 | 3  |
| P     | 8.692995763 | 2.253316297  | 3.320093866 | CORE        | 4           | P           | P  | 0.0000 | 4  |
| P     | 3.876105761 | 10.692754316 | 5.464167324 | CORE        | 5           | P           | P  | 0.0000 | 5  |
| P     | 0.815549452 | 6.452976441  | 5.671708093 | CORE        | 6           | P           | P  | 0.0000 | 6  |
| Al    | 3.691418524 | 5.413721207  | 0.785425419 | CORE        | 7           | Al          | Al | 0.0000 | 7  |
| Al    | 0.773153952 | 1.185991442  | 0.998235528 | CORE        | 8           | Al          | Al | 0.0000 | 8  |
| Al    | 5.630901397 | 9.645539482  | 3.059869580 | CORE        | 9           | Al          | Al | 0.0000 | 9  |
| Al    | 8.627661867 | 5.426214153  | 3.335988255 | CORE        | 10          | Al          | Al | 0.0000 | 10 |
| Al    | 3.810322030 | 5.423662833  | 5.462880283 | CORE        | 11          | Al          | Al | 0.0000 | 11 |
| Al    | 0.869037962 | 9.653499024  | 5.662779662 | CORE        | 12          | Al          | Al | 0.0000 | 12 |
| O     | 3.474267221 | 3.710826252  | 0.428638989 | CORE        | 13          | O           | O  | 0.0000 | 13 |
| O     | 2.456897199 | 1.590648593  | 1.321798619 | CORE        | 14          | O           | O  | 0.0000 | 14 |
| O     | 2.154650150 | 6.078485219  | 1.319012746 | CORE        | 15          | O           | O  | 0.0000 | 15 |
| O     | 0.494055457 | 7.954003109  | 1.374484916 | CORE        | 16          | O           | O  | 0.0000 | 16 |
| O     | 9.484136553 | 5.616226845  | 1.814508861 | CORE        | 17          | O           | O  | 0.0000 | 17 |
| O     | 4.840208507 | 2.159044991  | 1.833761539 | CORE        | 18          | O           | O  | 0.0000 | 18 |
| O     | 9.481891758 | 2.177214660  | 2.006490101 | CORE        | 19          | O           | O  | 0.0000 | 19 |
| O     | 4.886472269 | 5.597814488  | 2.039071634 | CORE        | 20          | O           | O  | 0.0000 | 20 |
| O     | 5.459324087 | 7.958909316  | 2.617504141 | CORE        | 21          | O           | O  | 0.0000 | 21 |
| O     | 7.316275504 | 10.075766774 | 3.125458155 | CORE        | 22          | O           | O  | 0.0000 | 22 |
| O     | 7.031213084 | 6.103903971  | 3.198571253 | CORE        | 23          | O           | O  | 0.0000 | 23 |
| O     | 8.534932999 | 3.720771640  | 3.731915498 | CORE        | 24          | O           | O  | 0.0000 | 24 |
| O     | 9.427612467 | 9.945674370  | 4.420941295 | CORE        | 25          | O           | O  | 0.0000 | 25 |
| O     | 4.882274667 | 6.347504349  | 4.441286245 | CORE        | 26          | O           | O  | 0.0000 | 26 |
| O     | 9.467485729 | 6.276780342  | 4.614934232 | CORE        | 27          | O           | O  | 0.0000 | 27 |

|   |             |              |             |      |    |   |   |        |    |
|---|-------------|--------------|-------------|------|----|---|---|--------|----|
| O | 4.880836253 | 9.900246967  | 4.626185284 | CORE | 28 | O | O | 0.0000 | 28 |
| O | 2.452384783 | 10.210713835 | 5.137472929 | CORE | 29 | O | O | 0.0000 | 29 |
| O | 2.146147687 | 5.897305150  | 5.133964948 | CORE | 30 | O | O | 0.0000 | 30 |
| O | 4.008505123 | 3.720088892  | 5.113403367 | CORE | 31 | O | O | 0.0000 | 31 |
| O | 0.965851306 | 7.940684141  | 6.005379660 | CORE | 32 | O | O | 0.0000 | 32 |
| O | 0.421011690 | 5.693118780  | 6.946366142 | CORE | 33 | O | O | 0.0000 | 33 |
| O | 4.187599655 | 10.480959250 | 6.954662424 | CORE | 34 | O | O | 0.0000 | 34 |
| O | 0.443446683 | 10.510423659 | 7.138521561 | CORE | 35 | O | O | 0.0000 | 35 |
| O | 4.212323086 | 5.723265839  | 7.146850361 | CORE | 36 | O | O | 0.0000 | 36 |

end

end

**GM in Table S6 at  $r_s = 3.5$  for  $\text{SiO}_2$**

!BIOSYM archive 2

PBC=ON

|       | Energy      | 0           | 0.0196      | -250.379330 | P4/m        |             |    |        |    |
|-------|-------------|-------------|-------------|-------------|-------------|-------------|----|--------|----|
| !DATE |             |             |             |             |             |             |    |        |    |
| PBC   | 8.61851073  | 7.75614122  | 8.59216584  | 90.26574547 | 90.05028326 | 89.33105498 |    |        |    |
| Si    | 6.118635670 | 1.823866205 | 0.728945825 | CORE        | 1           | Si          | Si | 0.0000 | 1  |
| Si    | 6.194810038 | 4.868470903 | 0.758726471 | CORE        | 2           | Si          | Si | 0.0000 | 2  |
| Si    | 3.212961583 | 1.886381570 | 1.952131987 | CORE        | 3           | Si          | Si | 0.0000 | 3  |
| Si    | 3.289601115 | 4.930696329 | 1.980802600 | CORE        | 4           | Si          | Si | 0.0000 | 4  |
| Si    | 7.663090749 | 7.213739228 | 2.089490337 | CORE        | 5           | Si          | Si | 0.0000 | 5  |
| Si    | 1.929841640 | 7.284162692 | 3.414018711 | CORE        | 6           | Si          | Si | 0.0000 | 6  |
| Si    | 6.339139949 | 7.249921850 | 4.978562293 | CORE        | 7           | Si          | Si | 0.0000 | 7  |
| Si    | 0.605805665 | 7.320250687 | 6.302843954 | CORE        | 8           | Si          | Si | 0.0000 | 8  |
| Si    | 4.888519278 | 1.847554966 | 6.411548989 | CORE        | 9           | Si          | Si | 0.0000 | 9  |
| Si    | 4.966309971 | 4.891389398 | 6.440300436 | CORE        | 10          | Si          | Si | 0.0000 | 10 |
| Si    | 1.983229937 | 1.909171761 | 7.634226141 | CORE        | 11          | Si          | Si | 0.0000 | 11 |
| Si    | 2.059913711 | 4.954037213 | 7.663280798 | CORE        | 12          | Si          | Si | 0.0000 | 12 |
| O     | 2.297199826 | 1.705960952 | 0.618826501 | CORE        | 13          | O           | O  | 0.0000 | 13 |
| O     | 2.386878446 | 5.185928846 | 0.651888957 | CORE        | 14          | O           | O  | 0.0000 | 14 |
| O     | 6.677735381 | 3.331346646 | 0.986735045 | CORE        | 15          | O           | O  | 0.0000 | 15 |
| O     | 7.245043535 | 0.761917079 | 1.179520011 | CORE        | 16          | O           | O  | 0.0000 | 16 |
| O     | 7.374575176 | 5.861719563 | 1.235582784 | CORE        | 17          | O           | O  | 0.0000 | 17 |
| O     | 4.767878151 | 1.572787531 | 1.601241459 | CORE        | 18          | O           | O  | 0.0000 | 18 |
| O     | 4.858779015 | 5.171915735 | 1.637088837 | CORE        | 19          | O           | O  | 0.0000 | 19 |
| O     | 0.608039816 | 7.247019679 | 2.482501466 | CORE        | 20          | O           | O  | 0.0000 | 20 |
| O     | 3.079563247 | 3.407812393 | 2.515917558 | CORE        | 21          | O           | O  | 0.0000 | 21 |
| O     | 2.705144751 | 0.861983645 | 3.088044328 | CORE        | 22          | O           | O  | 0.0000 | 22 |
| O     | 2.829455156 | 5.959940489 | 3.136102801 | CORE        | 23          | O           | O  | 0.0000 | 23 |
| O     | 6.740559244 | 7.225625043 | 3.417456512 | CORE        | 24          | O           | O  | 0.0000 | 24 |
| O     | 1.528447006 | 7.310303081 | 4.974671414 | CORE        | 25          | O           | O  | 0.0000 | 25 |
| O     | 5.348110283 | 0.817854693 | 5.256842997 | CORE        | 26          | O           | O  | 0.0000 | 26 |
| O     | 5.473828640 | 5.915910597 | 5.304338492 | CORE        | 27          | O           | O  | 0.0000 | 27 |
| O     | 5.099428778 | 3.370149890 | 5.875899283 | CORE        | 28          | O           | O  | 0.0000 | 28 |
| O     | 7.660869766 | 7.286813584 | 5.909781578 | CORE        | 29          | O           | O  | 0.0000 | 29 |
| O     | 3.319017079 | 1.606907481 | 6.755288087 | CORE        | 30          | O           | O  | 0.0000 | 30 |
| O     | 3.411061624 | 5.204080050 | 6.791383517 | CORE        | 31          | O           | O  | 0.0000 | 31 |
| O     | 0.803705122 | 0.915981996 | 7.158318386 | CORE        | 32          | O           | O  | 0.0000 | 32 |
| O     | 0.934047321 | 6.015343963 | 7.211378206 | CORE        | 33          | O           | O  | 0.0000 | 33 |
| O     | 1.500136743 | 3.446477425 | 7.406751526 | CORE        | 34          | O           | O  | 0.0000 | 34 |
| O     | 5.791084958 | 1.592849795 | 7.740413291 | CORE        | 35          | O           | O  | 0.0000 | 35 |
| O     | 5.881835805 | 5.071460090 | 7.773778578 | CORE        | 36          | O           | O  | 0.0000 | 36 |

end

end

**GM in Table S6 at  $r_s = 3.5$  for  $[\text{SiAlO}_4\text{H}]$**

!BIOSYM archive 2

PBC=ON

|       | Energy       | 0            | 0.0181      | -262.422290 | P1          |             |
|-------|--------------|--------------|-------------|-------------|-------------|-------------|
| IDATE |              |              |             |             |             |             |
| PBC   | 7.48213330   | 11.00785212  | 7.87840837  | 98.91010477 | 99.36879795 | 94.76605933 |
| Si    | 4.113114370  | 10.563606142 | 0.805982524 | CORE        | 1 Si Si     | 0.0000 1    |
| Si    | -0.814638236 | 9.701292722  | 2.131078241 | CORE        | 2 Si Si     | 0.0000 2    |
| Si    | 0.913970527  | 1.665685746  | 2.816641812 | CORE        | 3 Si Si     | 0.0000 3    |
| Si    | 6.075307550  | 3.580154064  | 3.884029522 | CORE        | 4 Si Si     | 0.0000 4    |
| Si    | 5.244677802  | 0.062867040  | 6.333832854 | CORE        | 5 Si Si     | 0.0000 5    |
| Si    | -1.507047253 | 3.139690804  | 6.906475630 | CORE        | 6 Si Si     | 0.0000 6    |
| Al    | 1.587093904  | 8.765246845  | 0.113743911 | CORE        | 7 Al Al     | 0.0000 7    |
| Al    | 2.315605617  | 3.456665102  | 0.502195505 | CORE        | 8 Al Al     | 0.0000 8    |
| Al    | 5.090594395  | 5.260712747  | 1.494895910 | CORE        | 9 Al Al     | 0.0000 9    |
| Al    | 4.008049183  | 1.104492124  | 3.493684724 | CORE        | 10 Al Al    | 0.0000 10   |
| Al    | -0.835027390 | 9.013935448  | 5.127488618 | CORE        | 11 Al Al    | 0.0000 11   |
| Al    | 2.284282425  | 0.553609050  | 5.520094191 | CORE        | 12 Al Al    | 0.0000 12   |
| O     | 5.949050390  | 4.963966826  | 0.028637069 | CORE        | 13 O O      | 0.0000 13   |
| O     | 1.140898185  | 4.708719915  | 0.100998391 | CORE        | 14 O O      | 0.0000 14   |
| O     | 2.168841262  | 7.155069969  | 0.467669833 | CORE        | 15 O O      | 0.0000 15   |
| O     | 5.315263838  | 9.498986349  | 1.186807076 | CORE        | 16 O O      | 0.0000 16   |
| O     | 0.493898752  | 9.405793577  | 1.265042170 | CORE        | 17 O O      | 0.0000 17   |
| O     | 1.603958398  | 2.200466779  | 1.492612171 | CORE        | 18 O O      | 0.0000 18   |
| O     | 4.324559059  | 6.871494154  | 1.449826874 | CORE        | 19 O O      | 0.0000 19   |
| O     | 3.569565640  | 4.234001558  | 1.606013404 | CORE        | 20 O O      | 0.0000 20   |
| O     | 4.334742471  | 0.114290907  | 2.155428460 | CORE        | 21 O O      | 0.0000 21   |
| O     | 0.045914859  | 0.303762449  | 2.620156809 | CORE        | 22 O O      | 0.0000 22   |
| O     | 5.966451198  | 4.904192665  | 2.971670436 | CORE        | 23 O O      | 0.0000 23   |
| O     | -0.954298911 | 8.753959310  | 3.434966819 | CORE        | 24 O O      | 0.0000 24   |
| O     | 4.765160327  | 2.643917337  | 3.571785609 | CORE        | 25 O O      | 0.0000 25   |
| O     | -0.029434244 | 2.722468668  | 3.598743541 | CORE        | 26 O O      | 0.0000 26   |
| O     | 2.189086510  | 1.235743168  | 3.842538763 | CORE        | 27 O O      | 0.0000 27   |
| O     | 4.076789033  | 0.304579441  | 5.144101299 | CORE        | 28 O O      | 0.0000 28   |
| O     | 6.104231863  | 3.957244680  | 5.479070091 | CORE        | 29 O O      | 0.0000 29   |
| O     | 0.746785161  | 9.841444864  | 5.532072938 | CORE        | 30 O O      | 0.0000 30   |
| O     | 6.316070547  | -1.006386514 | 5.837480126 | CORE        | 31 O O      | 0.0000 31   |
| O     | -0.509344382 | 7.476819648  | 6.091496409 | CORE        | 32 O O      | 0.0000 32   |
| O     | 5.907245090  | 1.512737463  | 6.596491604 | CORE        | 33 O O      | 0.0000 33   |
| O     | 1.835892929  | 1.537694539  | 6.778314517 | CORE        | 34 O O      | 0.0000 34   |
| O     | 1.730988611  | 8.454599598  | 7.540561863 | CORE        | 35 O O      | 0.0000 35   |
| O     | 4.372570732  | -0.490621421 | 7.595985088 | CORE        | 36 O O      | 0.0000 36   |
| H     | 1.735111657  | 6.273776879  | 0.350142651 | CORE        | 37 H H      | 0.0000 37   |
| H     | 3.267405828  | 6.993050492  | 0.968308846 | CORE        | 38 H H      | 0.0000 38   |
| H     | 4.773282158  | 7.732439887  | 1.388077675 | CORE        | 39 H H      | 0.0000 39   |
| H     | 3.668223072  | 3.744565367  | 2.445144562 | CORE        | 40 H H      | 0.0000 40   |
| H     | -0.708855470 | 6.622162507  | 5.675949564 | CORE        | 41 H H      | 0.0000 41   |
| H     | 1.283045667  | 9.307704591  | 6.187120506 | CORE        | 42 H H      | 0.0000 42   |

end

end

**GM in Table S6 at  $r_s = 4$  for AIPO**

!BIOSYM archive 2

PBC=ON

|       | Energy      | 0            | 0.0199      | -234.468358  | R-3         |             |
|-------|-------------|--------------|-------------|--------------|-------------|-------------|
| IDATE |             |              |             |              |             |             |
| PBC   | 5.15105686  | 12.43745646  | 12.43747204 | 118.12576003 | 82.06516968 | 82.06410618 |
| P     | 3.047441978 | -2.511164979 | 7.518402602 | CORE         | 1 P P       | 0.0000 1    |
| P     | 4.764577921 | 1.607363407  | 9.083530595 | CORE         | 2 P P       | 0.0000 2    |
| P     | 1.330479107 | 0.903593496  | 4.734017738 | CORE         | 3 P P       | 0.0000 3    |
| P     | 7.254696823 | 5.255656025  | 5.933969695 | CORE         | 4 P P       | 0.0000 4    |
| P     | 3.820598702 | 4.551841433  | 1.584618753 | CORE         | 5 P P       | 0.0000 5    |



|    |              |              |                   |          |        |    |
|----|--------------|--------------|-------------------|----------|--------|----|
| P  | 5.537733894  | 8.670248126  | 3.149632115 CORE  | 6 P P    | 0.0000 | 6  |
| Al | 4.7527212425 | 7.114682794  | 5.919929440 CORE  | 7 Al Al  | 0.0000 | 7  |
| Al | 1.318642897  | 3.634200285  | 3.201624518 CORE  | 8 Al Al  | 0.0000 | 8  |
| Al | 3.035712655  | 7.728614536  | 1.546580297 CORE  | 9 Al Al  | 0.0000 | 9  |
| Al | 5.549473741  | -1.569438433 | 9.121481131 CORE  | 10 Al Al | 0.0000 | 10 |
| Al | 7.266543483  | 2.524983096  | 7.466435256 CORE  | 11 Al Al | 0.0000 | 11 |
| Al | 3.832464967  | -0.955504016 | 4.748124737 CORE  | 12 Al Al | 0.0000 | 12 |
| O  | 5.120946342  | 7.853634369  | 4.376560160 CORE  | 13 O O   | 0.0000 | 13 |
| O  | 3.464247334  | -1.694434226 | 6.291480475 CORE  | 14 O O   | 0.0000 | 14 |
| O  | 5.062991039  | 4.331165233  | 2.444450255 CORE  | 15 O O   | 0.0000 | 15 |
| O  | 3.522174358  | 1.828017174  | 8.223586700 CORE  | 16 O O   | 0.0000 | 16 |
| O  | 5.860883581  | 10.113807036 | 3.557167010 CORE  | 17 O O   | 0.0000 | 17 |
| O  | 6.780076625  | 8.035800760  | 2.528690934 CORE  | 18 O O   | 0.0000 | 18 |
| O  | 5.239114313  | 0.048579293  | 4.973183801 CORE  | 19 O O   | 0.0000 | 19 |
| O  | 6.111995916  | 6.138688974  | 6.452669797 CORE  | 20 O O   | 0.0000 | 20 |
| O  | 4.190209523  | -2.518787372 | 8.542656539 CORE  | 21 O O   | 0.0000 | 21 |
| O  | 4.441386149  | 1.976329832  | 10.537409935 CORE | 22 O O   | 0.0000 | 22 |
| O  | 6.158419152  | 1.978320319  | 3.687807557 CORE  | 23 O O   | 0.0000 | 23 |
| O  | 6.837891001  | 4.601279716  | 4.613095558 CORE  | 24 O O   | 0.0000 | 24 |
| O  | 5.181263499  | 0.136757443  | 8.989753880 CORE  | 25 O O   | 0.0000 | 25 |
| O  | 2.677951108  | 3.660854940  | 2.089930060 CORE  | 26 O O   | 0.0000 | 26 |
| O  | 5.907250297  | 2.498329242  | 8.578112001 CORE  | 27 O O   | 0.0000 | 27 |
| O  | 3.403929711  | 6.022398412  | 1.678295661 CORE  | 28 O O   | 0.0000 | 28 |
| O  | 1.747302457  | 1.557904197  | 6.054988839 CORE  | 29 O O   | 0.0000 | 29 |
| O  | 2.426775619  | 4.180809416  | 6.980292014 CORE  | 30 O O   | 0.0000 | 30 |
| O  | 4.143807975  | 4.182839306  | 0.130587901 CORE  | 31 O O   | 0.0000 | 31 |
| O  | 4.394992301  | 8.677978899  | 2.125414174 CORE  | 32 O O   | 0.0000 | 32 |
| O  | 2.473206518  | 0.020473246  | 4.215392482 CORE  | 33 O O   | 0.0000 | 33 |
| O  | 3.346049805  | 6.110579238  | 5.694883181 CORE  | 34 O O   | 0.0000 | 34 |
| O  | 1.805088084  | -1.876603571 | 8.139380758 CORE  | 35 O O   | 0.0000 | 35 |
| O  | 2.724311065  | -3.954567091 | 7.110913525 CORE  | 36 O O   | 0.0000 | 36 |

end

end

**GM in Table S6 at  $r_s = 4$  for  $\text{SiO}_2$**

!BIOSYM archive 2

PBC=ON

|       | Energy       | 0           | 0.0172           | -250.271060 | C2                       |
|-------|--------------|-------------|------------------|-------------|--------------------------|
| !DATE |              |             |                  |             |                          |
| PBC   | 8.85418849   | 8.60328164  | 8.85453875       | 91.61672942 | 111.34756105 91.60375908 |
| Si    | 7.539588476  | 7.599410031 | 0.036921715 CORE | 1 Si Si     | 0.0000 1                 |
| Si    | 5.969187284  | 4.823694390 | 0.392908528 CORE | 2 Si Si     | 0.0000 2                 |
| Si    | 3.365996689  | 5.992641888 | 1.557258814 CORE | 3 Si Si     | 0.0000 3                 |
| Si    | 7.562840013  | 3.492497758 | 2.773303806 CORE | 4 Si Si     | 0.0000 4                 |
| Si    | -1.111944526 | 0.360201437 | 2.907180223 CORE | 5 Si Si     | 0.0000 5                 |
| Si    | 4.880753905  | 7.535887418 | 3.649215085 CORE | 6 Si Si     | 0.0000 6                 |
| Si    | 1.342247226  | 4.928704688 | 3.821423842 CORE | 7 Si Si     | 0.0000 7                 |
| Si    | 5.865269271  | 4.794516971 | 4.978851255 CORE | 8 Si Si     | 0.0000 8                 |
| Si    | 0.333343870  | 7.633288761 | 5.225028408 CORE | 9 Si Si     | 0.0000 9                 |
| Si    | 3.135073998  | 3.361858566 | 5.790752475 CORE | 10 Si Si    | 0.0000 10                |
| Si    | 3.317783850  | 0.242330753 | 5.931572539 CORE | 11 Si Si    | 0.0000 11                |
| Si    | -1.653176402 | 6.333776118 | 7.191251021 CORE | 12 Si Si    | 0.0000 12                |
| O     | 2.484537723  | 6.334847599 | 0.243161052 CORE | 13 O O      | 0.0000 13                |
| O     | 4.527383479  | 4.943906483 | 1.129875496 CORE | 14 O O      | 0.0000 14                |
| O     | 6.978169103  | 4.012421913 | 1.358203118 CORE | 15 O O      | 0.0000 15                |
| O     | 7.726125958  | 8.106488708 | 1.554150890 CORE | 16 O O      | 0.0000 16                |
| O     | 4.101216212  | 7.300260876 | 2.223432905 CORE | 17 O O      | 0.0000 17                |
| O     | -0.891737786 | 1.934906360 | 2.626122270 CORE | 18 O O      | 0.0000 18                |
| O     | 2.420432571  | 5.344436072 | 2.691513081 CORE | 19 O O      | 0.0000 19                |

|   |              |              |             |      |    |   |        |    |
|---|--------------|--------------|-------------|------|----|---|--------|----|
| O | 0.017265662  | 4.387105619  | 3.083490182 | CORE | 20 | O | 0.0000 | 20 |
| O | 6.231488324  | 0.110755173  | 3.471437453 | CORE | 21 | O | 0.0000 | 21 |
| O | 6.478086797  | 3.667620498  | 3.979762837 | CORE | 22 | O | 0.0000 | 22 |
| O | 0.012073091  | -0.140477100 | 3.956130970 | CORE | 23 | O | 0.0000 | 23 |
| O | 5.649716672  | 6.172890049  | 4.125025889 | CORE | 24 | O | 0.0000 | 24 |
| O | 1.977293380  | 3.731764474  | 4.714477463 | CORE | 25 | O | 0.0000 | 25 |
| O | 3.805698135  | 7.955446255  | 4.781860959 | CORE | 26 | O | 0.0000 | 26 |
| O | 0.955281580  | 6.196206836  | 4.767766289 | CORE | 27 | O | 0.0000 | 27 |
| O | 4.436770502  | 4.305109473  | 5.556597385 | CORE | 28 | O | 0.0000 | 28 |
| O | 3.565846455  | 1.811406160  | 5.629331199 | CORE | 29 | O | 0.0000 | 29 |
| O | 1.730629837  | -0.081806165 | 5.934320213 | CORE | 30 | O | 0.0000 | 30 |
| O | -1.953330204 | 5.037478906  | 6.229922052 | CORE | 31 | O | 0.0000 | 31 |
| O | -0.873327359 | 7.437049971  | 6.293828642 | CORE | 32 | O | 0.0000 | 32 |
| O | 2.541909341  | 3.624625425  | 7.275246434 | CORE | 33 | O | 0.0000 | 33 |
| O | 3.911634817  | -0.142374410 | 7.392889791 | CORE | 34 | O | 0.0000 | 34 |
| O | -3.079377073 | 6.913214018  | 7.672288168 | CORE | 35 | O | 0.0000 | 35 |
| O | 6.564100330  | 6.295645689  | 0.018274658 | CORE | 36 | O | 0.0000 | 36 |

end

end

**GM in Table S6 at  $r_s = 4$  for  $[\text{SiAlO}_4\text{H}]$**

!BIOSYM archive 2

PBC=ON

|       | Energy       | 0            | 0.0180      | -262.014289 | P1                        |
|-------|--------------|--------------|-------------|-------------|---------------------------|
| !DATE |              |              |             |             |                           |
| PBC   | 9.69393557   | 8.88569797   | 9.84558754  | 90.13528348 | 115.02752654 116.38803813 |
| Si    | -1.906521700 | 2.183567183  | 1.922337051 | CORE        | 1 Si Si 0.0000 1          |
| Si    | 6.118247048  | 0.183223413  | 3.279777373 | CORE        | 2 Si Si 0.0000 2          |
| Si    | 1.930658497  | 4.097764221  | 4.529234430 | CORE        | 3 Si Si 0.0000 3          |
| Si    | 5.532690220  | -1.162789008 | 5.867604492 | CORE        | 4 Si Si 0.0000 4          |
| Si    | 3.002589650  | 2.997925105  | 7.106138833 | CORE        | 5 Si Si 0.0000 5          |
| Si    | 3.153067766  | -0.108973142 | 7.564653523 | CORE        | 6 Si Si 0.0000 6          |
| Al    | 3.497872304  | 0.011392019  | 1.305188697 | CORE        | 7 Al Al 0.0000 7          |
| Al    | -2.108241648 | 5.384820228  | 2.440494950 | CORE        | 8 Al Al 0.0000 8          |
| Al    | 0.976459648  | 1.719434928  | 2.833934329 | CORE        | 9 Al Al 0.0000 9          |
| Al    | 4.401375446  | 5.841267732  | 3.692002279 | CORE        | 10 Al Al 0.0000 10        |
| Al    | 1.260072479  | -0.967765063 | 5.184989786 | CORE        | 11 Al Al 0.0000 11        |
| Al    | -5.205834744 | 5.689850762  | 6.713354592 | CORE        | 12 Al Al 0.0000 12        |
| O     | 7.091438524  | 1.792279752  | 0.475693628 | CORE        | 13 O O 0.0000 13          |
| O     | -1.586051377 | 6.706955281  | 1.474116398 | CORE        | 14 O O 0.0000 14          |
| O     | 2.514570480  | 1.491414686  | 1.847906830 | CORE        | 15 O O 0.0000 15          |
| O     | -0.494799079 | 1.386138969  | 2.040100431 | CORE        | 16 O O 0.0000 16          |
| O     | -1.703925191 | 3.778342273  | 2.055938993 | CORE        | 17 O O 0.0000 17          |
| O     | 4.938555130  | -0.072355813 | 2.208522286 | CORE        | 18 O O 0.0000 18          |
| O     | -3.959724988 | 5.512803953  | 2.489597472 | CORE        | 19 O O 0.0000 19          |
| O     | 6.722453248  | 1.696776029  | 3.074802136 | CORE        | 20 O O 0.0000 20          |
| O     | 3.391003743  | 7.096519516  | 3.137113670 | CORE        | 21 O O 0.0000 21          |
| O     | 1.092109026  | 3.350484804  | 3.388792719 | CORE        | 22 O O 0.0000 22          |
| O     | 3.439140930  | 4.448583819  | 4.068696979 | CORE        | 23 O O 0.0000 23          |
| O     | -1.669502129 | 5.866553017  | 4.192401584 | CORE        | 24 O O 0.0000 24          |
| O     | 1.256715545  | 0.675377240  | 4.364976660 | CORE        | 25 O O 0.0000 25          |
| O     | 5.491710275  | 0.082505142  | 4.813280786 | CORE        | 26 O O 0.0000 26          |
| O     | 1.102050807  | 5.441458073  | 5.016291516 | CORE        | 27 O O 0.0000 27          |
| O     | -4.278839528 | 6.188629035  | 5.204678341 | CORE        | 28 O O 0.0000 28          |
| O     | 1.982801604  | 3.036400929  | 5.808726764 | CORE        | 29 O O 0.0000 29          |
| O     | -2.725485669 | -1.384735332 | 6.541819892 | CORE        | 30 O O 0.0000 30          |
| O     | 1.804664087  | -0.648480852 | 6.796640507 | CORE        | 31 O O 0.0000 31          |
| O     | -5.443708962 | 3.990473431  | 6.930054271 | CORE        | 32 O O 0.0000 32          |
| O     | 4.415434510  | -0.961665046 | 7.023634299 | CORE        | 33 O O 0.0000 33          |

|   |              |              |                  |        |        |    |
|---|--------------|--------------|------------------|--------|--------|----|
| O | 3.449320069  | 1.450425318  | 7.228096235 CORE | 34 O O | 0.0000 | 34 |
| O | -0.327474831 | -1.734086416 | 8.208375401 CORE | 35 O O | 0.0000 | 35 |
| O | 2.151653550  | 3.484841484  | 8.441188669 CORE | 36 O O | 0.0000 | 36 |
| H | -2.824366003 | 6.276815970  | 0.194120336 CORE | 37 H H | 0.0000 | 37 |
| H | 5.454010192  | 5.425074776  | 1.554228360 CORE | 38 H H | 0.0000 | 38 |
| H | 2.991588898  | 2.333075090  | 1.803920425 CORE | 39 H H | 0.0000 | 39 |
| H | -0.753776253 | 5.646873557  | 4.483820904 CORE | 40 H H | 0.0000 | 40 |
| H | 1.515154962  | 1.351795149  | 5.040628863 CORE | 41 H H | 0.0000 | 41 |
| H | 0.539785627  | -1.317169400 | 8.008320233 CORE | 42 H H | 0.0000 | 42 |

end

end

**GM in Table S6 at  $r_s = 4.5$  for AIPO**

!BIOSYM archive 2

PBC=ON

|       | Energy       | 0            | 0.0187           | -234.145536 | P2_1/m      |             |
|-------|--------------|--------------|------------------|-------------|-------------|-------------|
| !DATE |              |              |                  |             |             |             |
| PBC   | 12.84915310  | 12.88904848  | 5.35032906       | 90.00000000 | 90.00000000 | 62.71147678 |
| P     | 7.768386329  | 6.634504704  | 1.337582265 CORE | 1 P P       | 0.0000      | 1           |
| P     | 7.452535375  | 1.529422658  | 1.337582265 CORE | 2 P P       | 0.0000      | 2           |
| P     | 14.732895671 | 7.222905133  | 1.337582265 CORE | 3 P P       | 0.0000      | 3           |
| P     | 10.990028790 | 4.820109797  | 4.012746795 CORE | 4 P P       | 0.0000      | 4           |
| P     | 11.305879737 | 9.925191832  | 4.012746795 CORE | 5 P P       | 0.0000      | 5           |
| P     | 4.025519440  | 4.231709361  | 4.012746795 CORE | 6 P P       | 0.0000      | 6           |
| Al    | 9.445493800  | 3.944638483  | 1.337582265 CORE | 7 Al Al     | 0.0000      | 7           |
| Al    | 4.736913244  | 5.878098280  | 1.337582265 CORE | 8 Al Al     | 0.0000      | 8           |
| Al    | 13.100137413 | 9.849518717  | 1.337582265 CORE | 9 Al Al     | 0.0000      | 9           |
| Al    | 9.312921314  | 7.509976011  | 4.012746795 CORE | 10 Al Al    | 0.0000      | 10          |
| Al    | 14.021501870 | 5.576516215  | 4.012746795 CORE | 11 Al Al    | 0.0000      | 11          |
| Al    | 5.658277701  | 1.605095777  | 4.012746795 CORE | 12 Al Al    | 0.0000      | 12          |
| O     | 12.124009485 | 9.579884506  | 5.260829885 CORE | 13 O O      | 0.0000      | 13          |
| O     | 4.648725941  | 4.870484739  | 5.259029979 CORE | 14 O O      | 0.0000      | 14          |
| O     | 6.634405629  | 1.874729989  | 0.089499175 CORE | 15 O O      | 0.0000      | 15          |
| O     | 14.109689173 | 6.584129756  | 0.091299082 CORE | 16 O O      | 0.0000      | 16          |
| O     | 8.328344021  | 7.322346430  | 0.091585303 CORE | 17 O O      | 0.0000      | 17          |
| O     | 10.430071092 | 4.132268063  | 5.258743760 CORE | 18 O O      | 0.0000      | 18          |
| O     | 6.245272090  | 6.767183895  | 1.337582265 CORE | 19 O O      | 0.0000      | 19          |
| O     | 7.815621215  | 0.036862696  | 1.337582265 CORE | 20 O O      | 0.0000      | 20          |
| O     | 8.746369984  | 2.341964622  | 1.337582265 CORE | 21 O O      | 0.0000      | 21          |
| O     | 16.254912978 | 7.027680575  | 1.337582265 CORE | 22 O O      | 0.0000      | 22          |
| O     | 8.149184011  | 5.139959156  | 1.337582265 CORE | 23 O O      | 0.0000      | 23          |
| O     | 14.442777262 | 8.726084945  | 1.337582265 CORE | 24 O O      | 0.0000      | 24          |
| O     | 6.634405629  | 1.874729989  | 2.585665355 CORE | 25 O O      | 0.0000      | 25          |
| O     | 14.109689173 | 6.584129756  | 2.583865448 CORE | 26 O O      | 0.0000      | 26          |
| O     | 12.124009485 | 9.579884506  | 2.764663705 CORE | 27 O O      | 0.0000      | 27          |
| O     | 4.648725941  | 4.870484739  | 2.766463611 CORE | 28 O O      | 0.0000      | 28          |
| O     | 10.430071092 | 4.132268063  | 2.766749830 CORE | 29 O O      | 0.0000      | 29          |
| O     | 8.328344021  | 7.322346430  | 2.583579227 CORE | 30 O O      | 0.0000      | 30          |
| O     | 12.513143022 | 4.687430599  | 4.012746795 CORE | 31 O O      | 0.0000      | 31          |
| O     | 10.942793898 | 11.417751800 | 4.012746795 CORE | 32 O O      | 0.0000      | 32          |
| O     | 10.012045131 | 9.112649874  | 4.012746795 CORE | 33 O O      | 0.0000      | 33          |
| O     | 2.503502138  | 4.426933919  | 4.012746795 CORE | 34 O O      | 0.0000      | 34          |
| O     | 10.609231104 | 6.314655336  | 4.012746795 CORE | 35 O O      | 0.0000      | 35          |
| O     | 4.315637853  | 2.728529549  | 4.012746795 CORE | 36 O O      | 0.0000      | 36          |

end

end

**GM in Table S6 at  $r_s = 4.5$  for SiO<sub>2</sub>**

!BIOSYM archive 2

PBC=ON

|       | Energy      | 0           | 0.0193      | -249.876679 | R-3m        |             |
|-------|-------------|-------------|-------------|-------------|-------------|-------------|
| !DATE |             |             |             |             |             |             |
| PBC   | 9.35153626  | 9.34860556  | 9.34844441  | 85.77080536 | 85.74307737 | 94.25917219 |
| Si    | 8.113055485 | 4.957747710 | 2.732853791 | CORE        | 1 Si Si     | 0.0000 1    |
| Si    | 1.045056112 | 2.841538512 | 2.734980269 | CORE        | 2 Si Si     | 0.0000 2    |
| Si    | 6.453865804 | 3.168329349 | 4.667298568 | CORE        | 3 Si Si     | 0.0000 3    |
| Si    | 8.736586030 | 1.053780667 | 4.671262383 | CORE        | 4 Si Si     | 0.0000 4    |
| Si    | 3.328624155 | 3.006030661 | 4.844218870 | CORE        | 5 Si Si     | 0.0000 5    |
| Si    | 8.112671738 | 7.245550519 | 4.845187324 | CORE        | 6 Si Si     | 0.0000 6    |
| Si    | 1.670733060 | 1.220085002 | 6.782161736 | CORE        | 7 Si Si     | 0.0000 7    |
| Si    | 6.453666525 | 5.460093820 | 6.783089455 | CORE        | 8 Si Si     | 0.0000 8    |
| Si    | 1.044744184 | 7.412124909 | 6.955179745 | CORE        | 9 Si Si     | 0.0000 9    |
| Si    | 3.328609128 | 5.296672898 | 6.958963857 | CORE        | 10 Si Si    | 0.0000 10   |
| Si    | 8.736548650 | 5.624527445 | 8.890815269 | CORE        | 11 Si Si    | 0.0000 11   |
| Si    | 1.670791743 | 3.507262739 | 8.893120651 | CORE        | 12 Si Si    | 0.0000 12   |
| O     | 7.797189980 | 5.182557436 | 1.165438075 | CORE        | 13 O O      | 0.0000 13   |
| O     | 1.292321124 | 2.540476401 | 1.167718087 | CORE        | 14 O O      | 0.0000 14   |
| O     | 0.206758588 | 4.227429505 | 2.920703716 | CORE        | 15 O O      | 0.0000 15   |
| O     | 6.938477909 | 4.032350021 | 3.375637685 | CORE        | 16 O O      | 0.0000 16   |
| O     | 0.212396993 | 1.601137018 | 3.380825738 | CORE        | 17 O O      | 0.0000 17   |
| O     | 8.153108637 | 6.399048239 | 3.466898601 | CORE        | 18 O O      | 0.0000 18   |
| O     | 2.479441719 | 2.993102928 | 3.467389516 | CORE        | 19 O O      | 0.0000 19   |
| O     | 4.890919629 | 2.802004380 | 4.490426474 | CORE        | 20 O O      | 0.0000 20   |
| O     | 7.796917156 | 8.789978107 | 4.495426381 | CORE        | 21 O O      | 0.0000 21   |
| O     | 7.301225200 | 1.793742356 | 4.769106494 | CORE        | 22 O O      | 0.0000 22   |
| O     | 0.205997221 | 7.116297826 | 5.588878300 | CORE        | 23 O O      | 0.0000 23   |
| O     | 3.098386295 | 4.434548132 | 5.594879853 | CORE        | 24 O O      | 0.0000 24   |
| O     | 2.847890732 | 1.789084905 | 5.812568258 | CORE        | 25 O O      | 0.0000 25   |
| O     | 6.937930415 | 6.678903713 | 5.818903703 | CORE        | 26 O O      | 0.0000 26   |
| O     | 6.682648646 | 4.033123438 | 6.029715904 | CORE        | 27 O O      | 0.0000 27   |
| O     | 9.579181859 | 1.349483894 | 6.035337506 | CORE        | 28 O O      | 0.0000 28   |
| O     | 2.479061857 | 6.669880425 | 6.862193608 | CORE        | 29 O O      | 0.0000 29   |
| O     | 1.292667389 | 8.998307908 | 7.130404386 | CORE        | 30 O O      | 0.0000 30   |
| O     | 4.890804030 | 5.665886533 | 7.134314718 | CORE        | 31 O O      | 0.0000 31   |
| O     | 7.301050730 | 5.468051156 | 8.161330272 | CORE        | 32 O O      | 0.0000 32   |
| O     | 1.626708313 | 2.064690622 | 8.161553445 | CORE        | 33 O O      | 0.0000 33   |
| O     | 0.212089061 | 6.867887746 | 8.243335865 | CORE        | 34 O O      | 0.0000 34   |
| O     | 2.848412079 | 4.428240327 | 8.249220042 | CORE        | 35 O O      | 0.0000 35   |
| O     | 9.579582004 | 4.241749433 | 8.703342203 | CORE        | 36 O O      | 0.0000 36   |

end

end

**GM in Table S6 at  $r_s = 4.5$  for  $[\text{SiAlO}_4\text{H}]$**

!BIOSYM archive 2

PBC=ON

|       | Energy       | 0            | 0.0182      | -261.604835 | P1          |             |
|-------|--------------|--------------|-------------|-------------|-------------|-------------|
| !DATE |              |              |             |             |             |             |
| PBC   | 9.15269960   | 9.09191479   | 9.43441470  | 66.95554660 | 84.10908732 | 82.75786896 |
| Si    | 1.376227366  | 7.001316674  | 2.040726417 | CORE        | 1 Si Si     | 0.0000 1    |
| Si    | 6.131076443  | 4.294899549  | 2.805045106 | CORE        | 2 Si Si     | 0.0000 2    |
| Si    | 8.813907827  | 5.404098776  | 4.080302181 | CORE        | 3 Si Si     | 0.0000 3    |
| Si    | 4.390673383  | 2.678171077  | 4.767583982 | CORE        | 4 Si Si     | 0.0000 4    |
| Si    | 1.353213102  | 3.005860583  | 5.196434054 | CORE        | 5 Si Si     | 0.0000 5    |
| Si    | 7.856727277  | 7.991081504  | 5.278405905 | CORE        | 6 Si Si     | 0.0000 6    |
| Al    | 6.865017313  | 1.531725459  | 1.339670027 | CORE        | 7 Al Al     | 0.0000 7    |
| Al    | 4.296864921  | 6.465095431  | 1.463812885 | CORE        | 8 Al Al     | 0.0000 8    |
| Al    | 5.753996484  | 8.921908545  | 3.158694468 | CORE        | 9 Al Al     | 0.0000 9    |
| Al    | 10.257570784 | 9.534987787  | 3.768894725 | CORE        | 10 Al Al    | 0.0000 10   |
| Al    | 7.008456379  | 10.165162416 | 7.126313816 | CORE        | 11 Al Al    | 0.0000 11   |

|    |             |              |             |      |    |    |    |        |    |
|----|-------------|--------------|-------------|------|----|----|----|--------|----|
| Al | 9.972217978 | 11.822479607 | 8.014974052 | CORE | 12 | Al | Al | 0.0000 | 12 |
| O  | 9.884067758 | 7.836554905  | 0.779328566 | CORE | 13 | O  | O  | 0.0000 | 13 |
| O  | 6.746180367 | 9.287099722  | 1.629844143 | CORE | 14 | O  | O  | 0.0000 | 14 |
| O  | 2.613918334 | 6.064877950  | 1.574972917 | CORE | 15 | O  | O  | 0.0000 | 15 |
| O  | 6.386586119 | 3.088072478  | 1.742112280 | CORE | 16 | O  | O  | 0.0000 | 16 |
| O  | 5.693011024 | 5.583501306  | 1.926380182 | CORE | 17 | O  | O  | 0.0000 | 17 |
| O  | 8.385498525 | 1.080427764  | 2.142081945 | CORE | 18 | O  | O  | 0.0000 | 18 |
| O  | 4.407960553 | 8.062092473  | 2.343984626 | CORE | 19 | O  | O  | 0.0000 | 19 |
| O  | 9.280927215 | 6.187626268  | 2.714654298 | CORE | 20 | O  | O  | 0.0000 | 20 |
| O  | 1.946133468 | 8.132383169  | 3.090278833 | CORE | 21 | O  | O  | 0.0000 | 21 |
| O  | 7.485724322 | 4.559131677  | 3.684116570 | CORE | 22 | O  | O  | 0.0000 | 22 |
| O  | 5.305884327 | 10.434042465 | 3.793467452 | CORE | 23 | O  | O  | 0.0000 | 23 |
| O  | 4.954827574 | 3.929337288  | 3.877756648 | CORE | 24 | O  | O  | 0.0000 | 24 |
| O  | 1.016344326 | 1.778992551  | 4.221348904 | CORE | 25 | O  | O  | 0.0000 | 25 |
| O  | 6.660681930 | 7.904709109  | 4.189365422 | CORE | 26 | O  | O  | 0.0000 | 26 |
| O  | 0.859532074 | 4.428794832  | 4.552965617 | CORE | 27 | O  | O  | 0.0000 | 27 |
| O  | 8.970168547 | 9.083286725  | 4.816729623 | CORE | 28 | O  | O  | 0.0000 | 28 |
| O  | 8.498791487 | 6.449660676  | 5.328344768 | CORE | 29 | O  | O  | 0.0000 | 29 |
| O  | 2.969038881 | 3.109058596  | 5.476492009 | CORE | 30 | O  | O  | 0.0000 | 30 |
| O  | 6.617908694 | 11.338259121 | 5.938570090 | CORE | 31 | O  | O  | 0.0000 | 31 |
| O  | 9.709398842 | 2.818375212  | 6.593255767 | CORE | 32 | O  | O  | 0.0000 | 32 |
| O  | 7.303493243 | 8.497551593  | 6.738860300 | CORE | 33 | O  | O  | 0.0000 | 33 |
| O  | 8.201622947 | 4.553139176  | 8.295607013 | CORE | 34 | O  | O  | 0.0000 | 34 |
| O  | 8.475164112 | 10.745472769 | 8.125266398 | CORE | 35 | O  | O  | 0.0000 | 35 |
| O  | 5.633919480 | 10.424793271 | 8.353439872 | CORE | 36 | O  | O  | 0.0000 | 36 |
| H  | 7.684296511 | 6.495504825  | 0.161640789 | CORE | 37 | H  | H  | 0.0000 | 37 |
| H  | 6.333625165 | 8.925750811  | 0.835012306 | CORE | 38 | H  | H  | 0.0000 | 38 |
| H  | 9.983438591 | 9.461672279  | 1.540638607 | CORE | 39 | H  | H  | 0.0000 | 39 |
| H  | 3.495541502 | 8.246175973  | 2.737330176 | CORE | 40 | H  | H  | 0.0000 | 40 |
| H  | 8.394673908 | 5.196540297  | 7.590146892 | CORE | 41 | H  | H  | 0.0000 | 41 |
| H  | 4.862560206 | 10.784498721 | 7.886287401 | CORE | 42 | H  | H  | 0.0000 | 42 |

end

end

**GM in Table S6 at  $r_s = 5$  for AIPO**

!BIOSYM archive 2

PBC=ON

|       | Energy      | 0           | 0.0200      | -233.965249 | R-3         |             |    |        |    |
|-------|-------------|-------------|-------------|-------------|-------------|-------------|----|--------|----|
| !DATE |             |             |             |             |             |             |    |        |    |
| PBC   | 9.46899444  | 9.47008214  | 9.45861105  | 94.50302200 | 85.47427984 | 85.43895964 |    |        |    |
| P     | 7.986406380 | 2.016082025 | 0.710577668 | CORE        | 1           | P           | P  | 0.0000 | 1  |
| P     | 3.920256016 | 1.749346269 | 2.697257768 | CORE        | 2           | P           | P  | 0.0000 | 2  |
| P     | 6.353830934 | 6.976537889 | 2.786423881 | CORE        | 3           | P           | P  | 0.0000 | 3  |
| P     | 8.571070283 | 3.661807718 | 4.888037962 | CORE        | 4           | P           | P  | 0.0000 | 4  |
| P     | 1.534866897 | 8.887518569 | 4.977578798 | CORE        | 5           | P           | P  | 0.0000 | 5  |
| P     | 6.939586165 | 8.625085642 | 6.964348276 | CORE        | 6           | P           | P  | 0.0000 | 6  |
| Al    | 6.346707632 | 9.368527461 | 0.717222400 | CORE        | 7           | Al          | Al | 0.0000 | 7  |
| Al    | 6.300903732 | 3.841673652 | 2.679020298 | CORE        | 8           | Al          | Al | 0.0000 | 8  |
| Al    | 0.787439731 | 1.851332216 | 2.898868117 | CORE        | 9           | Al          | Al | 0.0000 | 9  |
| Al    | 4.668660135 | 8.789953740 | 4.776648216 | CORE        | 10          | Al          | Al | 0.0000 | 10 |
| Al    | 8.626031270 | 6.796988172 | 4.993905076 | CORE        | 11          | Al          | Al | 0.0000 | 11 |
| Al    | 8.577021713 | 1.268319192 | 6.957954160 | CORE        | 12          | Al          | Al | 0.0000 | 12 |
| O     | 7.156497791 | 0.726153707 | 0.843531102 | CORE        | 13          | O           | O  | 0.0000 | 13 |
| O     | 7.222006842 | 3.197146125 | 1.329858549 | CORE        | 14          | O           | O  | 0.0000 | 14 |
| O     | 9.326213562 | 1.821343085 | 1.420035645 | CORE        | 15          | O           | O  | 0.0000 | 15 |
| O     | 4.363442021 | 0.927153311 | 1.476006584 | CORE        | 16          | O           | O  | 0.0000 | 16 |
| O     | 6.440370616 | 7.816093474 | 1.512414369 | CORE        | 17          | O           | O  | 0.0000 | 17 |
| O     | 6.000876965 | 5.540172475 | 2.399919544 | CORE        | 18          | O           | O  | 0.0000 | 18 |
| O     | 2.461066023 | 2.163263979 | 2.507844838 | CORE        | 19          | O           | O  | 0.0000 | 19 |

|   |              |             |             |      |    |   |        |    |
|---|--------------|-------------|-------------|------|----|---|--------|----|
| O | 4.770719929  | 3.012637004 | 2.824831042 | CORE | 20 | O | 0.0000 | 20 |
| O | 7.714568236  | 7.014746498 | 3.505121853 | CORE | 21 | O | 0.0000 | 21 |
| O | 0.628243860  | 0.293794923 | 3.700940687 | CORE | 22 | O | 0.0000 | 22 |
| O | 5.255318437  | 7.522997614 | 3.712396612 | CORE | 23 | O | 0.0000 | 23 |
| O | 9.670767411  | 3.121364160 | 3.960322483 | CORE | 24 | O | 0.0000 | 24 |
| O | 4.073655610  | 0.910017732 | 3.978719375 | CORE | 25 | O | 0.0000 | 25 |
| O | 7.210112982  | 3.620794239 | 4.169039612 | CORE | 26 | O | 0.0000 | 26 |
| O | 10.158099175 | 7.621787434 | 4.840637050 | CORE | 27 | O | 0.0000 | 27 |
| O | 2.995163682  | 8.477619742 | 5.167493405 | CORE | 28 | O | 0.0000 | 28 |
| O | 8.919726126  | 5.098397981 | 5.278382428 | CORE | 29 | O | 0.0000 | 29 |
| O | 8.487646420  | 2.819453088 | 6.160116553 | CORE | 30 | O | 0.0000 | 30 |
| O | 9.801600598  | 0.260388078 | 6.202498996 | CORE | 31 | O | 0.0000 | 31 |
| O | 5.598806062  | 8.814448605 | 6.255370158 | CORE | 32 | O | 0.0000 | 32 |
| O | 7.710810474  | 7.449692912 | 6.342877658 | CORE | 33 | O | 0.0000 | 33 |
| O | 7.009460249  | 0.479412849 | 6.834351637 | CORE | 34 | O | 0.0000 | 34 |
| O | 6.671613158  | 8.314331644 | 8.436261997 | CORE | 35 | O | 0.0000 | 35 |
| O | 9.001886994  | 1.518036314 | 8.632811167 | CORE | 36 | O | 0.0000 | 36 |

end

end

**GM in Table S6 at  $r_s = 5$  for  $\text{SiO}_2$**

!BIOSYM archive 2

PBC=ON

|       | Energy       | 0            | 0.0166      | -249.879520 | R-3m               |
|-------|--------------|--------------|-------------|-------------|--------------------|
| IDATE |              |              |             |             |                    |
| PBC   | 9.35455180   | 9.35501242   | 9.35413722  | 94.18705706 | 94.18896414        |
| Si    | 6.851546059  | 3.696723086  | 1.191489221 | CORE        | 1 Si Si 0.0000 1   |
| Si    | 1.370346089  | 8.792073793  | 1.189685196 | CORE        | 2 Si Si 0.0000 2   |
| Si    | 4.509776004  | 8.958325423  | 1.370294429 | CORE        | 3 Si Si 0.0000 3   |
| Si    | 6.788849045  | 6.839539377  | 1.371660891 | CORE        | 4 Si Si 0.0000 4   |
| Si    | 6.852292498  | 1.411697801  | 3.302026917 | CORE        | 5 Si Si 0.0000 5   |
| Si    | 8.447003335  | 8.625159700  | 3.301850573 | CORE        | 6 Si Si 0.0000 6   |
| Si    | 6.791743635  | 1.343618965  | 6.449665627 | CORE        | 7 Si Si 0.0000 7   |
| Si    | -0.969834094 | 8.557369655  | 6.449436330 | CORE        | 8 Si Si 0.0000 8   |
| Si    | 8.449124850  | 3.128899760  | 8.380744369 | CORE        | 9 Si Si 0.0000 9   |
| Si    | 1.373417244  | 1.011062355  | 8.380632501 | CORE        | 10 Si Si 0.0000 10 |
| Si    | 4.512835524  | 1.176437966  | 8.561592210 | CORE        | 11 Si Si 0.0000 11 |
| Si    | -0.970133303 | 6.272069139  | 8.560513549 | CORE        | 12 Si Si 0.0000 12 |
| O     | 0.894504562  | 7.569852595  | 0.224670493 | CORE        | 13 O O 0.0000 13   |
| O     | 5.666418617  | 3.133094571  | 0.227438169 | CORE        | 14 O O 0.0000 14   |
| O     | 8.291508575  | 3.544211093  | 0.441979455 | CORE        | 15 O O 0.0000 15   |
| O     | 1.796410617  | 0.887592155  | 0.442249927 | CORE        | 16 O O 0.0000 16   |
| O     | 5.349574764  | 7.576490163  | 1.289918984 | CORE        | 17 O O 0.0000 17   |
| O     | 6.555244111  | 5.248632096  | 1.526727522 | CORE        | 18 O O 0.0000 18   |
| O     | 2.940009193  | 8.609373259  | 1.523896377 | CORE        | 19 O O 0.0000 19   |
| O     | 0.531515625  | 8.765971677  | 2.573791644 | CORE        | 20 O O 0.0000 20   |
| O     | 6.887838214  | 2.857911604  | 2.575597908 | CORE        | 21 O O 0.0000 21   |
| O     | 5.666842985  | 0.495292621  | 2.664413307 | CORE        | 22 O O 0.0000 22   |
| O     | 7.618575608  | 7.376077065  | 2.665539597 | CORE        | 23 O O 0.0000 23   |
| O     | 8.292512743  | 0.677709225  | 3.089475035 | CORE        | 24 O O 0.0000 24   |
| O     | 6.557576576  | 1.622047258  | 4.875823656 | CORE        | 25 O O 0.0000 25   |
| O     | -0.674369739 | 8.346611540  | 4.875396251 | CORE        | 26 O O 0.0000 26   |
| O     | 7.627564463  | -0.039611484 | 6.661383270 | CORE        | 27 O O 0.0000 27   |
| O     | 7.621532858  | 2.591785454  | 7.085463628 | CORE        | 28 O O 0.0000 28   |
| O     | 0.897863794  | 0.145133869  | 7.086360040 | CORE        | 29 O O 0.0000 29   |
| O     | 5.352810040  | 1.204408620  | 7.178344727 | CORE        | 30 O O 0.0000 30   |
| O     | -1.005251995 | 7.111157529  | 7.176643929 | CORE        | 31 O O 0.0000 31   |
| O     | 2.943338033  | 1.358196133  | 8.225322262 | CORE        | 32 O O 0.0000 32   |
| O     | -0.673449181 | 4.719945660  | 8.225491936 | CORE        | 33 O O 0.0000 33   |

|   |             |             |                  |        |        |    |
|---|-------------|-------------|------------------|--------|--------|----|
| O | 0.534321362 | 2.393177816 | 8.464156602 CORE | 34 O O | 0.0000 | 34 |
| O | 5.451030956 | 0.484976841 | 0.007716013 CORE | 35 O O | 0.0000 | 35 |
| O | 7.624345838 | 7.158575713 | 0.008735459 CORE | 36 O O | 0.0000 | 36 |

end

end

**GM in Table S6 at  $r_s = 5$  for [SiAlO<sub>4</sub>H]**

!BIOSYM archive 2

PBC=ON

|       | Energy       | 0           | 0.0188           | -260.962325 | P1          |             |
|-------|--------------|-------------|------------------|-------------|-------------|-------------|
| !DATE |              |             |                  |             |             |             |
| PBC   | 9.78745758   | 9.73667913  | 9.78573003       | 85.64131141 | 85.75880875 | 94.10992480 |
| Si    | 5.291098300  | 6.592866040 | 0.002742870 CORE | 1 Si Si     | 0.0000      | 1           |
| Si    | 8.537112187  | 9.126407819 | 2.186329023 CORE | 2 Si Si     | 0.0000      | 2           |
| Si    | 3.682860254  | 1.470938111 | 2.230009990 CORE | 3 Si Si     | 0.0000      | 3           |
| Si    | 3.477036304  | 6.990522535 | 4.355644987 CORE | 4 Si Si     | 0.0000      | 4           |
| Si    | 1.222245428  | 9.354692401 | 7.550506416 CORE | 5 Si Si     | 0.0000      | 5           |
| Si    | 1.774418065  | 5.242019183 | 9.623581716 CORE | 6 Si Si     | 0.0000      | 6           |
| Al    | 1.160325278  | 1.252394045 | 0.234005484 CORE | 7 Al Al     | 0.0000      | 7           |
| Al    | 3.464342930  | 4.670404170 | 2.073760778 CORE | 8 Al Al     | 0.0000      | 8           |
| Al    | 5.288057775  | 8.892282876 | 2.229065870 CORE | 9 Al Al     | 0.0000      | 9           |
| Al    | 1.160687138  | 9.281508507 | 4.356951197 CORE | 10 Al Al    | 0.0000      | 10          |
| Al    | 3.618645640  | 7.238552672 | 7.560829981 CORE | 11 Al Al    | 0.0000      | 11          |
| Al    | 9.262223722  | 7.520309734 | 9.508101929 CORE | 12 Al Al    | 0.0000      | 12          |
| O     | 4.893558084  | 7.840478948 | 0.920346482 CORE | 13 O O      | 0.0000      | 13          |
| O     | 4.933221299  | 5.192349119 | 1.029280245 CORE | 14 O O      | 0.0000      | 14          |
| O     | 9.651514930  | 0.463867153 | 1.051881996 CORE | 15 O O      | 0.0000      | 15          |
| O     | 2.074007957  | 4.845645382 | 1.062374863 CORE | 16 O O      | 0.0000      | 16          |
| O     | 2.678770443  | 1.085197084 | 1.046840754 CORE | 17 O O      | 0.0000      | 17          |
| O     | 8.885107104  | 7.548460489 | 1.455449105 CORE | 18 O O      | 0.0000      | 18          |
| O     | 5.011025966  | 0.597284650 | 2.291724255 CORE | 19 O O      | 0.0000      | 19          |
| O     | 3.934222430  | 3.041709900 | 2.430746998 CORE | 20 O O      | 0.0000      | 20          |
| O     | 6.976163394  | 9.117587269 | 2.519532692 CORE | 21 O O      | 0.0000      | 21          |
| O     | -0.313019281 | 9.123913083 | 3.482177371 CORE | 22 O O      | 0.0000      | 22          |
| O     | 3.447830722  | 5.647440047 | 3.492892255 CORE | 23 O O      | 0.0000      | 23          |
| O     | 2.776548317  | 1.081069004 | 3.705763483 CORE | 24 O O      | 0.0000      | 24          |
| O     | 4.876133867  | 7.892784772 | 3.794602530 CORE | 25 O O      | 0.0000      | 25          |
| O     | 2.238307783  | 7.961553929 | 4.074090400 CORE | 26 O O      | 0.0000      | 26          |
| O     | 3.811527564  | 6.743147051 | 5.906031940 CORE | 27 O O      | 0.0000      | 27          |
| O     | 0.957639950  | 9.753710343 | 6.014246978 CORE | 28 O O      | 0.0000      | 28          |
| O     | 2.633565709  | 8.636082965 | 7.803104370 CORE | 29 O O      | 0.0000      | 29          |
| O     | 2.601340384  | 5.746626478 | 8.148045913 CORE | 30 O O      | 0.0000      | 30          |
| O     | 9.801308689  | 8.632989906 | 8.303276775 CORE | 31 O O      | 0.0000      | 31          |
| O     | 2.039971422  | 1.241313525 | 8.272104120 CORE | 32 O O      | 0.0000      | 32          |
| O     | 5.087740289  | 7.217920270 | 8.442732516 CORE | 33 O O      | 0.0000      | 33          |
| O     | 1.571784800  | 3.667601065 | 9.385396771 CORE | 34 O O      | 0.0000      | 34          |
| O     | 7.573626290  | 7.193547391 | 9.459501353 CORE | 35 O O      | 0.0000      | 35          |
| O     | 0.414644078  | 6.076630459 | 9.668897555 CORE | 36 O O      | 0.0000      | 36          |
| H     | 5.646155941  | 4.539415297 | 1.005724370 CORE | 37 H H      | 0.0000      | 37          |
| H     | 9.416987519  | 6.990898718 | 2.041626795 CORE | 38 H H      | 0.0000      | 38          |
| H     | 5.637676869  | 7.793644080 | 4.381801361 CORE | 39 H H      | 0.0000      | 39          |
| H     | 2.855892978  | 1.798562391 | 4.347223410 CORE | 40 H H      | 0.0000      | 40          |
| H     | 2.456476704  | 5.134148961 | 7.414628069 CORE | 41 H H      | 0.0000      | 41          |
| H     | 1.969691021  | 1.917989569 | 7.585874911 CORE | 42 H H      | 0.0000      | 42          |

end

end

**GM in Table S6 at  $r_s = 5.5$  for AIPO**

!BIOSYM archive 2

PBC=ON

|       | Energy      | 0           | 0.0196      | -233.946437 | R-3         |             |
|-------|-------------|-------------|-------------|-------------|-------------|-------------|
| !DATE |             |             |             |             |             |             |
| PBC   | 9.46367740  | 9.46339346  | 9.46311034  | 95.20810929 | 84.80343596 | 84.77524030 |
| P     | 3.299000200 | 3.169827545 | 0.701017403 | CORE        | 1 P P       | 0.0000 1    |
| P     | 5.829700885 | 8.368604105 | 0.732090461 | CORE        | 2 P P       | 0.0000 2    |
| P     | 7.956390326 | 5.028628485 | 2.866334973 | CORE        | 3 P P       | 0.0000 3    |
| P     | 9.624443067 | 0.804156693 | 2.895169915 | CORE        | 4 P P       | 0.0000 4    |
| P     | 5.570001366 | 0.573537503 | 4.930268607 | CORE        | 5 P P       | 0.0000 5    |
| P     | 8.208085653 | 2.458857281 | 8.043595034 | CORE        | 6 P P       | 0.0000 6    |
| Al    | 5.673675682 | 5.234000082 | 0.684216385 | CORE        | 7 Al Al     | 0.0000 7    |
| Al    | 9.627405604 | 3.206412852 | 0.836704352 | CORE        | 8 Al Al     | 0.0000 8    |
| Al    | 3.295863636 | 0.767909218 | 2.761157607 | CORE        | 9 Al Al     | 0.0000 9    |
| Al    | 8.110133014 | 8.163271995 | 2.913104193 | CORE        | 10 Al Al    | 0.0000 10   |
| Al    | 7.961387935 | 2.641603645 | 4.921182135 | CORE        | 11 Al Al    | 0.0000 11   |
| Al    | 5.819439953 | 0.390362019 | 8.052828767 | CORE        | 12 Al Al    | 0.0000 12   |
| O     | 5.429403634 | 6.936489323 | 0.376488664 | CORE        | 13 O O      | 0.0000 13   |
| O     | 1.836385707 | 3.548048431 | 0.464504050 | CORE        | 14 O O      | 0.0000 14   |
| O     | 4.117225612 | 4.453924645 | 0.842120766 | CORE        | 15 O O      | 0.0000 15   |
| O     | 7.208770970 | 8.379260443 | 1.416579415 | CORE        | 16 O O      | 0.0000 16   |
| O     | 9.491833177 | 1.626337619 | 1.600175465 | CORE        | 17 O O      | 0.0000 17   |
| O     | 4.771160563 | 8.958706783 | 1.675424228 | CORE        | 18 O O      | 0.0000 18   |
| O     | 9.018115812 | 4.438676317 | 1.926096991 | CORE        | 19 O O      | 0.0000 19   |
| O     | 3.431559905 | 2.346508482 | 1.995007375 | CORE        | 20 O O      | 0.0000 20   |
| O     | 6.579189065 | 5.016425152 | 2.178010030 | CORE        | 21 O O      | 0.0000 21   |
| O     | 9.665744659 | 8.945257277 | 2.757096415 | CORE        | 22 O O      | 0.0000 22   |
| O     | 1.622885601 | 0.424102176 | 3.130274203 | CORE        | 23 O O      | 0.0000 23   |
| O     | 8.354905047 | 6.461063025 | 3.222477054 | CORE        | 24 O O      | 0.0000 24   |
| O     | 9.128276091 | 1.627784608 | 4.092706351 | CORE        | 25 O O      | 0.0000 25   |
| O     | 7.876548295 | 4.210906675 | 4.155945984 | CORE        | 26 O O      | 0.0000 26   |
| O     | 7.211034500 | 8.865546734 | 4.244897812 | CORE        | 27 O O      | 0.0000 27   |
| O     | 4.217872434 | 0.777327468 | 4.246214728 | CORE        | 28 O O      | 0.0000 28   |
| O     | 6.373129524 | 1.885102329 | 4.855593577 | CORE        | 29 O O      | 0.0000 29   |
| O     | 5.323725077 | 0.188620324 | 6.389534749 | CORE        | 30 O O      | 0.0000 30   |
| O     | 8.456690338 | 2.843072383 | 6.584684323 | CORE        | 31 O O      | 0.0000 31   |
| O     | 7.408852649 | 1.144786045 | 8.117277345 | CORE        | 32 O O      | 0.0000 32   |
| O     | 9.559259843 | 2.259764975 | 8.731133384 | CORE        | 33 O O      | 0.0000 33   |
| O     | 7.423915413 | 3.589153684 | 8.726274431 | CORE        | 34 O O      | 0.0000 34   |
| O     | 6.763782477 | 8.245820207 | 8.819586404 | CORE        | 35 O O      | 0.0000 35   |
| O     | 4.654632300 | 1.407611259 | 8.880000259 | CORE        | 36 O O      | 0.0000 36   |

end

end

**GM in Table S6 at  $r_s = 5.5$  for  $\text{SiO}_2$**

!BIOSYM archive 2

PBC=ON

|       | Energy       | 0            | 0.0186      | -248.934270 | P1           |             |
|-------|--------------|--------------|-------------|-------------|--------------|-------------|
| !DATE |              |              |             |             |              |             |
| PBC   | 9.61079757   | 9.60093444   | 9.47763182  | 75.08307414 | 101.80313751 | 98.34039342 |
| Si    | 6.692845023  | 6.980731902  | 0.202613228 | CORE        | 1 Si Si      | 0.0000 1    |
| Si    | 6.744352012  | 4.095022158  | 1.131581386 | CORE        | 2 Si Si      | 0.0000 2    |
| Si    | 4.658490169  | 1.964792127  | 1.145722852 | CORE        | 3 Si Si      | 0.0000 3    |
| Si    | 7.843810634  | 9.420684167  | 1.511560800 | CORE        | 4 Si Si      | 0.0000 4    |
| Si    | 6.123211148  | 2.568765924  | 3.618232439 | CORE        | 5 Si Si      | 0.0000 5    |
| Si    | 7.024896676  | 10.080205841 | 4.407079750 | CORE        | 6 Si Si      | 0.0000 6    |
| Si    | 6.101509966  | 3.359398336  | 6.600152193 | CORE        | 7 Si Si      | 0.0000 7    |
| Si    | -0.661145289 | 1.939331982  | 6.843427618 | CORE        | 8 Si Si      | 0.0000 8    |
| Si    | 6.840268320  | 8.671604132  | 7.043500174 | CORE        | 9 Si Si      | 0.0000 9    |
| Si    | 7.192868209  | 5.838703122  | 8.100512422 | CORE        | 10 Si Si     | 0.0000 10   |
| Si    | -0.159303848 | 3.844405975  | 8.987953862 | CORE        | 11 Si Si     | 0.0000 11   |



|    |              |              |                  |          |        |    |
|----|--------------|--------------|------------------|----------|--------|----|
| Si | 4.702054443  | 2.233115577  | 8.998435487 CORE | 12 Si Si | 0.0000 | 12 |
| O  | 8.152741437  | 3.898638050  | 0.354409818 CORE | 13 O O   | 0.0000 | 13 |
| O  | 5.580203015  | 3.149273697  | 0.481347448 CORE | 14 O O   | 0.0000 | 14 |
| O  | 5.231406548  | 0.520029042  | 0.630209633 CORE | 15 O O   | 0.0000 | 15 |
| O  | 3.119965870  | 2.141137315  | 0.720594036 CORE | 16 O O   | 0.0000 | 16 |
| O  | 7.889702137  | 0.631529951  | 0.894849589 CORE | 17 O O   | 0.0000 | 17 |
| O  | 0.953632104  | 0.647727770  | 0.938622757 CORE | 18 O O   | 0.0000 | 18 |
| O  | 6.284878434  | 5.653165261  | 1.042348582 CORE | 19 O O   | 0.0000 | 19 |
| O  | 7.789079646  | 7.843829828  | 1.072308797 CORE | 20 O O   | 0.0000 | 20 |
| O  | 6.933420886  | 3.659926623  | 2.699989980 CORE | 21 O O   | 0.0000 | 21 |
| O  | 4.804325576  | 2.093774992  | 2.775383973 CORE | 22 O O   | 0.0000 | 22 |
| O  | -1.742583591 | 9.544243373  | 3.132633741 CORE | 23 O O   | 0.0000 | 23 |
| O  | 7.028854109  | 1.246725241  | 3.897509200 CORE | 24 O O   | 0.0000 | 24 |
| O  | 5.710180026  | 3.261183768  | 5.028731526 CORE | 25 O O   | 0.0000 | 25 |
| O  | -0.328638682 | 1.708017493  | 5.251249657 CORE | 26 O O   | 0.0000 | 26 |
| O  | 6.683315360  | 8.831338131  | 5.417131880 CORE | 27 O O   | 0.0000 | 27 |
| O  | 7.377425484  | 2.399738491  | 6.952413216 CORE | 28 O O   | 0.0000 | 28 |
| O  | 6.464747514  | 4.901189204  | 6.978980743 CORE | 29 O O   | 0.0000 | 29 |
| O  | -2.046933416 | 7.270930283  | 7.412363529 CORE | 30 O O   | 0.0000 | 30 |
| O  | 4.840699225  | 2.838238330  | 7.491343514 CORE | 31 O O   | 0.0000 | 31 |
| O  | -1.901034693 | 9.966465632  | 7.553274674 CORE | 32 O O   | 0.0000 | 32 |
| O  | 0.246305514  | 3.042066871  | 7.605809464 CORE | 33 O O   | 0.0000 | 33 |
| O  | 5.377734897  | 8.719725592  | 7.776696866 CORE | 34 O O   | 0.0000 | 34 |
| O  | -1.049313331 | 5.145711543  | 8.617886388 CORE | 35 O O   | 0.0000 | 35 |
| O  | 3.434576703  | 10.101893904 | 8.983693525 CORE | 36 O O   | 0.0000 | 36 |

end

end

**GM in Table S6 at  $r_s = 5.5$  for  $[\text{SiAlO}_4\text{H}]$**

!BIOSYM archive 2

PBC=ON

|       | Energy       | 0           | 0.0156           | -260.436460 | P1          |             |
|-------|--------------|-------------|------------------|-------------|-------------|-------------|
| !DATE |              |             |                  |             |             |             |
| PBC   | 9.71060826   | 9.63952645  | 9.84684184       | 85.59135311 | 84.82764195 | 92.86673729 |
| Si    | 8.783622863  | 9.208849131 | 2.079585232 CORE | 1 Si Si     | 0.0000      | 1           |
| Si    | 3.708381515  | 1.652308072 | 2.179520051 CORE | 2 Si Si     | 0.0000      | 2           |
| Si    | 3.706381834  | 7.132129203 | 4.274701250 CORE | 3 Si Si     | 0.0000      | 3           |
| Si    | 1.548925943  | 9.518260673 | 7.375115398 CORE | 4 Si Si     | 0.0000      | 4           |
| Si    | 2.247431100  | 5.486853430 | 9.528853095 CORE | 5 Si Si     | 0.0000      | 5           |
| Si    | 6.235587049  | 7.608389331 | 9.614564441 CORE | 6 Si Si     | 0.0000      | 6           |
| Al    | 1.209326070  | 1.441324862 | 0.025659512 CORE | 7 Al Al     | 0.0000      | 7           |
| Al    | 3.447013780  | 4.915315103 | 1.963920102 CORE | 8 Al Al     | 0.0000      | 8           |
| Al    | 5.490405939  | 9.015950744 | 2.110810308 CORE | 9 Al Al     | 0.0000      | 9           |
| Al    | 1.457159440  | 9.494787703 | 4.168978014 CORE | 10 Al Al    | 0.0000      | 10          |
| Al    | 3.894605529  | 7.353158230 | 7.481712684 CORE | 11 Al Al    | 0.0000      | 11          |
| Al    | 9.480985514  | 7.811208300 | 9.425561047 CORE | 12 Al Al    | 0.0000      | 12          |
| O     | 2.906880498  | 1.098136923 | 0.648416368 CORE | 13 O O      | 0.0000      | 13          |
| O     | 4.947275627  | 8.029157927 | 0.794349289 CORE | 14 O O      | 0.0000      | 14          |
| O     | 4.837115219  | 5.389039909 | 0.754744262 CORE | 15 O O      | 0.0000      | 15          |
| O     | 9.750718441  | 0.654538887 | 0.978446037 CORE | 16 O O      | 0.0000      | 16          |
| O     | 1.922822903  | 5.235594662 | 1.159267296 CORE | 17 O O      | 0.0000      | 17          |
| O     | 9.166162855  | 7.646413136 | 1.284466778 CORE | 18 O O      | 0.0000      | 18          |
| O     | 3.829081444  | 3.229058364 | 1.966395161 CORE | 19 O O      | 0.0000      | 19          |
| O     | 7.200475180  | 9.166651029 | 2.221466490 CORE | 20 O O      | 0.0000      | 20          |
| O     | 5.110263998  | 0.888981484 | 2.126178650 CORE | 21 O O      | 0.0000      | 21          |
| O     | 2.678972503  | 1.214979725 | 3.307159373 CORE | 22 O O      | 0.0000      | 22          |
| O     | 3.713303611  | 5.777160868 | 3.414406241 CORE | 23 O O      | 0.0000      | 23          |
| O     | -0.095933628 | 9.155546792 | 3.421094164 CORE | 24 O O      | 0.0000      | 24          |
| O     | 5.109165075  | 8.053965618 | 3.663487335 CORE | 25 O O      | 0.0000      | 25          |

|   |              |             |             |      |    |   |   |        |    |
|---|--------------|-------------|-------------|------|----|---|---|--------|----|
| O | 2.443735964  | 8.060329452 | 3.967321810 | CORE | 26 | O | O | 0.0000 | 26 |
| O | 4.115252564  | 6.959020495 | 5.802808139 | CORE | 27 | O | O | 0.0000 | 27 |
| O | 1.245217647  | 9.897246278 | 5.864902307 | CORE | 28 | O | O | 0.0000 | 28 |
| O | 2.950744058  | 8.835690095 | 7.715698414 | CORE | 29 | O | O | 0.0000 | 29 |
| O | 2.155476539  | 1.529474059 | 8.107626622 | CORE | 30 | O | O | 0.0000 | 30 |
| O | 5.463828179  | 7.555067454 | 8.231647309 | CORE | 31 | O | O | 0.0000 | 31 |
| O | 10.041203497 | 8.852916853 | 8.200375174 | CORE | 32 | O | O | 0.0000 | 32 |
| O | 3.017669389  | 6.026308751 | 8.260663395 | CORE | 33 | O | O | 0.0000 | 33 |
| O | 0.593966667  | 6.159581360 | 9.456756936 | CORE | 34 | O | O | 0.0000 | 34 |
| O | 7.832900198  | 7.376048565 | 9.495545934 | CORE | 35 | O | O | 0.0000 | 35 |
| O | 1.882628966  | 3.919217887 | 9.507902593 | CORE | 36 | O | O | 0.0000 | 36 |
| H | 3.479162410  | 0.507295142 | 0.132877206 | CORE | 37 | H | H | 0.0000 | 37 |
| H | 5.317114568  | 4.589546479 | 0.497230871 | CORE | 38 | H | H | 0.0000 | 38 |
| H | 0.045184490  | 7.084265341 | 1.812953014 | CORE | 39 | H | H | 0.0000 | 39 |
| H | 5.785486451  | 8.101003331 | 4.353978957 | CORE | 40 | H | H | 0.0000 | 40 |
| H | 2.199030614  | 2.194693842 | 7.404355477 | CORE | 41 | H | H | 0.0000 | 41 |
| H | 9.664990274  | 5.434776291 | 9.428408407 | CORE | 42 | H | H | 0.0000 | 42 |

end

end

**GM in Table S6 at  $r_s = 6$  for AIPO**

!BIOSYM archive 2

PBC=ON

|       | Energy       | 0           | 0.0223      | -226.463767 | P1          |             |    |        |    |
|-------|--------------|-------------|-------------|-------------|-------------|-------------|----|--------|----|
| !DATE |              |             |             |             |             |             |    |        |    |
| PBC   | 9.84608346   | 9.72782226  | 7.75839768  | 94.09699209 | 95.06147270 | 74.66497536 |    |        |    |
| P     | 2.121438358  | 5.271651315 | 1.469247618 | CORE        | 1           | P           | P  | 0.0000 | 1  |
| P     | 6.093656679  | 2.174456320 | 3.262766065 | CORE        | 2           | P           | P  | 0.0000 | 2  |
| P     | 7.199452185  | 4.724575606 | 2.745367255 | CORE        | 3           | P           | P  | 0.0000 | 3  |
| P     | 5.274224290  | 5.647434497 | 6.090573685 | CORE        | 4           | P           | P  | 0.0000 | 4  |
| P     | 9.646544794  | 4.179714867 | 7.089236965 | CORE        | 5           | P           | P  | 0.0000 | 5  |
| P     | 3.639854635  | 1.305965398 | 7.109732847 | CORE        | 6           | P           | P  | 0.0000 | 6  |
| Al    | 10.063993662 | 7.390217362 | 0.510062411 | CORE        | 7           | Al          | Al | 0.0000 | 7  |
| Al    | 6.514451004  | 0.327838474 | 0.893274772 | CORE        | 8           | Al          | Al | 0.0000 | 8  |
| Al    | 4.275840046  | 4.563704129 | 3.499037684 | CORE        | 9           | Al          | Al | 0.0000 | 9  |
| Al    | 7.246371472  | 3.507207241 | 5.541496036 | CORE        | 10          | Al          | Al | 0.0000 | 10 |
| Al    | 6.179059782  | 7.639283716 | 7.126382535 | CORE        | 11          | Al          | Al | 0.0000 | 11 |
| Al    | 2.506622211  | 3.417804680 | 7.002375914 | CORE        | 12          | Al          | Al | 0.0000 | 12 |
| O     | 8.288747271  | 8.090744366 | 0.451063954 | CORE        | 13          | O           | O  | 0.0000 | 13 |
| O     | 3.408812885  | 2.399939367 | 0.438125658 | CORE        | 14          | O           | O  | 0.0000 | 14 |
| O     | 5.101102575  | 1.171832537 | 7.554987947 | CORE        | 15          | O           | O  | 0.0000 | 15 |
| O     | 10.839274298 | 4.237097875 | 0.877658257 | CORE        | 16          | O           | O  | 0.0000 | 16 |
| O     | 3.211370859  | 5.238074062 | 0.375717112 | CORE        | 17          | O           | O  | 0.0000 | 17 |
| O     | 10.627846011 | 9.025823830 | 0.567236004 | CORE        | 18          | O           | O  | 0.0000 | 18 |
| O     | 11.232638922 | 6.577673160 | 1.644665938 | CORE        | 19          | O           | O  | 0.0000 | 19 |
| O     | 6.031859077  | 0.834320447 | 2.549582556 | CORE        | 20          | O           | O  | 0.0000 | 20 |
| O     | 2.674127313  | 4.739095211 | 2.774642614 | CORE        | 21          | O           | O  | 0.0000 | 21 |
| O     | 6.983629421  | 3.112403071 | 2.311966417 | CORE        | 22          | O           | O  | 0.0000 | 22 |
| O     | 8.111825652  | 5.373303502 | 1.796774564 | CORE        | 23          | O           | O  | 0.0000 | 23 |
| O     | 5.731986341  | 5.265431649 | 2.775133094 | CORE        | 24          | O           | O  | 0.0000 | 24 |
| O     | 4.723859894  | 2.841247731 | 3.429642010 | CORE        | 25          | O           | O  | 0.0000 | 25 |
| O     | 6.778505227  | 2.052027323 | 4.636374991 | CORE        | 26          | O           | O  | 0.0000 | 26 |
| O     | 7.719916594  | 4.572554107 | 4.203836273 | CORE        | 27          | O           | O  | 0.0000 | 27 |
| O     | 4.105511752  | 5.336828216 | 5.109773230 | CORE        | 28          | O           | O  | 0.0000 | 28 |
| O     | 6.324720614  | 6.684497124 | 5.569062558 | CORE        | 29          | O           | O  | 0.0000 | 29 |
| O     | 5.921524481  | 4.282837173 | 6.399752395 | CORE        | 30          | O           | O  | 0.0000 | 30 |
| O     | 8.468015074  | 3.286406668 | 6.782035485 | CORE        | 31          | O           | O  | 0.0000 | 31 |
| O     | 0.981237701  | 3.770852966 | 6.190136710 | CORE        | 32          | O           | O  | 0.0000 | 32 |
| O     | 3.525663282  | 2.354621568 | 5.958392329 | CORE        | 33          | O           | O  | 0.0000 | 33 |

|   |             |              |                  |        |        |    |
|---|-------------|--------------|------------------|--------|--------|----|
| O | 4.828436167 | 6.400763914  | 7.379481829 CORE | 34 O O | 0.0000 | 34 |
| O | 3.083182730 | -0.090509204 | 6.765394918 CORE | 35 O O | 0.0000 | 35 |
| O | 9.350544322 | 5.671833751  | 7.003406002 CORE | 36 O O | 0.0000 | 36 |

end

end

**GM in Table S6 at  $r_s = 6$  for  $\text{SiO}_2$**

!BIOSYM archive 2

PBC=ON

|       | Energy       | 0           | 0.0187            | -246.346128 | lmcm        |              |
|-------|--------------|-------------|-------------------|-------------|-------------|--------------|
| !DATE |              |             |                   |             |             |              |
| PBC   | 10.50835871  | 12.16180885 | 12.16190514       | 96.58685114 | 64.45689745 | 115.54318287 |
| Si    | 3.641919597  | 2.606126338 | 0.987342406 CORE  | 1 Si Si     | 0.0000      | 1            |
| Si    | 6.544843587  | 2.614907548 | 0.989366599 CORE  | 2 Si Si     | 0.0000      | 2            |
| Si    | 1.290952852  | 4.046928902 | 2.301168592 CORE  | 3 Si Si     | 0.0000      | 3            |
| Si    | 8.895795782  | 4.049613440 | 2.309823993 CORE  | 4 Si Si     | 0.0000      | 4            |
| Si    | -0.155760638 | 6.608532411 | 2.635572524 CORE  | 5 Si Si     | 0.0000      | 5            |
| Si    | -0.152296665 | 8.942846922 | 2.930151281 CORE  | 6 Si Si     | 0.0000      | 6            |
| Si    | 6.547539737  | 0.529075790 | 3.255681546 CORE  | 7 Si Si     | 0.0000      | 7            |
| Si    | 3.644643168  | 0.531272094 | 3.263802119 CORE  | 8 Si Si     | 0.0000      | 8            |
| Si    | 8.898487508  | 1.964110436 | 4.575874951 CORE  | 9 Si Si     | 0.0000      | 9            |
| Si    | 11.801992760 | 1.972468762 | 4.577311007 CORE  | 10 Si Si    | 0.0000      | 10           |
| Si    | 10.345894792 | 2.521108112 | 7.097975374 CORE  | 11 Si Si    | 0.0000      | 11           |
| Si    | 10.342469702 | 3.018188172 | 9.397768246 CORE  | 12 Si Si    | 0.0000      | 12           |
| O     | 2.463129504  | 3.692287857 | 1.236961872 CORE  | 13 O O      | 0.0000      | 13           |
| O     | 7.717819621  | 3.705675203 | 1.249227796 CORE  | 14 O O      | 0.0000      | 14           |
| O     | 5.091076991  | 3.218799646 | 1.460901153 CORE  | 15 O O      | 0.0000      | 15           |
| O     | -0.161082516 | 7.923695083 | 1.609540416 CORE  | 16 O O      | 0.0000      | 16           |
| O     | -0.163123692 | 3.523839418 | 1.741681708 CORE  | 17 O O      | 0.0000      | 17           |
| O     | 6.854892847  | 1.243915101 | 1.820359480 CORE  | 18 O O      | 0.0000      | 18           |
| O     | 3.334680321  | 1.238786935 | 1.825163968 CORE  | 19 O O      | 0.0000      | 19           |
| O     | 1.178508394  | 5.669055492 | 2.498491676 CORE  | 20 O O      | 0.0000      | 20           |
| O     | 9.015200114  | 5.670494406 | 2.515063063 CORE  | 21 O O      | 0.0000      | 21           |
| O     | 1.184662989  | 9.881178869 | 3.050405004 CORE  | 22 O O      | 0.0000      | 22           |
| O     | -1.486976661 | 9.882108482 | 3.066528428 CORE  | 23 O O      | 0.0000      | 23           |
| O     | 1.601751645  | 3.339485985 | 3.739615711 CORE  | 24 O O      | 0.0000      | 24           |
| O     | 8.587835188  | 3.335200324 | 3.745088143 CORE  | 25 O O      | 0.0000      | 25           |
| O     | 5.098053805  | 1.054141623 | 3.824282165 CORE  | 26 O O      | 0.0000      | 26           |
| O     | -0.146962693 | 7.627693656 | 3.956140558 CORE  | 27 O O      | 0.0000      | 27           |
| O     | 10.352295783 | 1.360665238 | 4.103470377 CORE  | 28 O O      | 0.0000      | 28           |
| O     | 7.726102583  | 0.873187216 | 4.316078963 CORE  | 29 O O      | 0.0000      | 29           |
| O     | 2.471361120  | 0.885388878 | 4.327248694 CORE  | 30 O O      | 0.0000      | 30           |
| O     | 9.011292992  | 2.302786493 | 6.174345263 CORE  | 31 O O      | 0.0000      | 31           |
| O     | 11.682969879 | 2.318982642 | 6.173788331 CORE  | 32 O O      | 0.0000      | 32           |
| O     | 10.337175616 | 3.925599159 | 7.998139108 CORE  | 33 O O      | 0.0000      | 33           |
| O     | 10.351330984 | 1.613691970 | 8.497706544 CORE  | 34 O O      | 0.0000      | 34           |
| O     | 9.005164756  | 3.219607921 | 10.321800013 CORE | 35 O O      | 0.0000      | 35           |
| O     | 11.676797750 | 3.236174493 | 10.321775184 CORE | 36 O O      | 0.0000      | 36           |

end

end

**GM in Table S6 at  $r_s = 6$  for  $[\text{SiAlO}_4\text{H}]$**

!BIOSYM archive 2

PBC=ON

|       | Energy      | 0           | 0.0195           | -257.852563 | P1          |             |
|-------|-------------|-------------|------------------|-------------|-------------|-------------|
| !DATE |             |             |                  |             |             |             |
| PBC   | 11.84170195 | 11.05201134 | 10.42549716      | 76.32327342 | 86.20064015 | 70.38058647 |
| Si    | 7.282362987 | 1.608661769 | 0.725737376 CORE | 1 Si Si     | 0.0000      | 1           |
| Si    | 1.842491107 | 1.339215197 | 1.118395832 CORE | 2 Si Si     | 0.0000      | 2           |
| Si    | 4.700715072 | 1.177998204 | 1.912215330 CORE | 3 Si Si     | 0.0000      | 3           |

|    |              |              |              |      |          |        |    |
|----|--------------|--------------|--------------|------|----------|--------|----|
| Si | 11.436961430 | 3.264546463  | 2.059512343  | CORE | 4 Si Si  | 0.0000 | 4  |
| Si | 10.744200958 | 10.860381258 | 3.456054088  | CORE | 5 Si Si  | 0.0000 | 5  |
| Si | 9.315210466  | 9.452970858  | 9.593010325  | CORE | 6 Si Si  | 0.0000 | 6  |
| Al | 9.036054422  | 4.080355898  | 0.318401958  | CORE | 7 Al Al  | 0.0000 | 7  |
| Al | 6.975798111  | 9.309612080  | 0.372359584  | CORE | 8 Al Al  | 0.0000 | 8  |
| Al | 10.158362872 | 9.218113464  | 1.126977370  | CORE | 9 Al Al  | 0.0000 | 9  |
| Al | 8.661430132  | 3.139054374  | 3.298480273  | CORE | 10 Al Al | 0.0000 | 10 |
| Al | 7.225095282  | 2.158467591  | 5.762186811  | CORE | 11 Al Al | 0.0000 | 11 |
| Al | 9.176893782  | 11.754284343 | 7.670967830  | CORE | 12 Al Al | 0.0000 | 12 |
| O  | 7.242978989  | 7.633535849  | 0.198513349  | CORE | 13 O O   | 0.0000 | 13 |
| O  | 7.281370023  | 0.075320318  | 0.182295941  | CORE | 14 O O   | 0.0000 | 14 |
| O  | 9.883439881  | 7.736953244  | 0.323049007  | CORE | 15 O O   | 0.0000 | 15 |
| O  | 10.693562436 | 3.710324875  | 0.686383131  | CORE | 16 O O   | 0.0000 | 16 |
| O  | 5.585803495  | 10.133325956 | 0.971366280  | CORE | 17 O O   | 0.0000 | 17 |
| O  | 5.691155927  | 2.044990253  | 0.937416357  | CORE | 18 O O   | 0.0000 | 18 |
| O  | 8.423515946  | 10.016775625 | 1.269631987  | CORE | 19 O O   | 0.0000 | 19 |
| O  | 12.367767047 | 1.929632556  | 1.786179334  | CORE | 20 O O   | 0.0000 | 20 |
| O  | 8.260264516  | 4.369087729  | 2.018189713  | CORE | 21 O O   | 0.0000 | 21 |
| O  | 3.204182688  | 1.752858426  | 2.003043490  | CORE | 22 O O   | 0.0000 | 22 |
| O  | 7.838245090  | 1.600003562  | 2.414888780  | CORE | 23 O O   | 0.0000 | 23 |
| O  | 12.485036988 | 4.424255212  | 2.573526064  | CORE | 24 O O   | 0.0000 | 24 |
| O  | 10.796179718 | 9.417698443  | 2.759310681  | CORE | 25 O O   | 0.0000 | 25 |
| O  | 10.352144853 | 2.872987728  | 3.204828372  | CORE | 26 O O   | 0.0000 | 26 |
| O  | 5.443949111  | 1.027005286  | 3.379026962  | CORE | 27 O O   | 0.0000 | 27 |
| O  | 7.867970493  | 3.400471881  | 4.806133103  | CORE | 28 O O   | 0.0000 | 28 |
| O  | 11.314525736 | 11.052498939 | 4.935520829  | CORE | 29 O O   | 0.0000 | 29 |
| O  | 5.364283729  | 1.940053775  | 5.985692617  | CORE | 30 O O   | 0.0000 | 30 |
| O  | 7.123848773  | 2.133386265  | 7.579392037  | CORE | 31 O O   | 0.0000 | 31 |
| O  | 9.315674857  | 10.121809934 | 8.092544771  | CORE | 32 O O   | 0.0000 | 32 |
| O  | 8.009649245  | 12.467888743 | 8.813520116  | CORE | 33 O O   | 0.0000 | 33 |
| O  | 9.384142609  | 7.860227155  | 9.533410803  | CORE | 34 O O   | 0.0000 | 34 |
| O  | 2.796925614  | 4.308528889  | 9.712032306  | CORE | 35 O O   | 0.0000 | 35 |
| O  | 8.824391694  | 5.004352498  | 10.004165998 | CORE | 36 O O   | 0.0000 | 36 |
| H  | 7.977775733  | 5.268635624  | 2.220023319  | CORE | 37 H H   | 0.0000 | 37 |
| H  | 12.246623088 | 5.330869268  | 2.360993410  | CORE | 38 H H   | 0.0000 | 38 |
| H  | 4.848299350  | 1.644456271  | 5.221319198  | CORE | 39 H H   | 0.0000 | 39 |
| H  | 7.744666596  | 2.243823252  | 8.318344418  | CORE | 40 H H   | 0.0000 | 40 |
| H  | 3.849083619  | 2.916668256  | 8.713078480  | CORE | 41 H H   | 0.0000 | 41 |
| H  | 2.162388704  | 4.939985304  | 9.356186147  | CORE | 42 H H   | 0.0000 | 42 |

end

end

**The structure of  $\text{Si}_6\text{Al}_6\text{O}_{24}\text{Na}_6(\text{H}_2\text{O})_6$**

!BIOSYM archive 2

PBC=ON

|       | Energy      | 0           | 0.0261      | -332.656975 | P1          |             |    |
|-------|-------------|-------------|-------------|-------------|-------------|-------------|----|
| !DATE |             |             |             |             |             |             |    |
| PBC   | 9.32668567  | 9.51214518  | 9.67455313  | 88.61408154 | 85.52856948 | 94.49244790 |    |
| Si    | 4.667621465 | 5.995760912 | 0.135386891 | CORE        | 1 Si Si     | 0.0000      | 1  |
| Si    | 7.942034386 | 8.434340094 | 2.277331787 | CORE        | 2 Si Si     | 0.0000      | 2  |
| Si    | 3.295922786 | 1.011016857 | 2.551828715 | CORE        | 3 Si Si     | 0.0000      | 3  |
| Si    | 3.086644295 | 6.342549233 | 4.439490674 | CORE        | 4 Si Si     | 0.0000      | 4  |
| Si    | 0.952006696 | 8.362564361 | 7.626601652 | CORE        | 5 Si Si     | 0.0000      | 5  |
| Si    | 1.449907298 | 4.262468621 | 9.549187227 | CORE        | 6 Si Si     | 0.0000      | 6  |
| Al    | 0.865108724 | 0.861444233 | 0.415466394 | CORE        | 7 Al Al     | 0.0000      | 7  |
| Al    | 3.156851132 | 4.102803450 | 2.004471282 | CORE        | 8 Al Al     | 0.0000      | 8  |
| Al    | 4.636947996 | 8.132130482 | 2.424836226 | CORE        | 9 Al Al     | 0.0000      | 9  |
| Al    | 0.828816525 | 8.639729198 | 4.547481852 | CORE        | 10 Al Al    | 0.0000      | 10 |
| Al    | 3.173680951 | 6.094309194 | 7.498196746 | CORE        | 11 Al Al    | 0.0000      | 11 |

---

|     |             |             |                  |          |        |    |
|-----|-------------|-------------|------------------|----------|--------|----|
| Al  | 8.723743471 | 6.604476675 | 9.631042437 CORE | 12 Al Al | 0.0000 | 12 |
| Na  | 3.056399634 | 3.301532300 | 4.995609109 CORE | 13 Na Na | 0.0000 | 13 |
| Na  | 9.296619183 | 4.413968451 | 6.812958219 CORE | 14 Na Na | 0.0000 | 14 |
| Na  | 6.426596359 | 8.021429000 | 4.914793325 CORE | 15 Na Na | 0.0000 | 15 |
| Na  | 3.348049797 | 8.879071516 | 9.437116451 CORE | 16 Na Na | 0.0000 | 16 |
| Na  | 6.537302974 | 3.493637760 | 0.501401779 CORE | 17 Na Na | 0.0000 | 17 |
| Na  | 0.485547786 | 5.729834418 | 2.818113419 CORE | 18 Na Na | 0.0000 | 18 |
| O   | 4.043024896 | 7.251905249 | 0.995953212 CORE | 19 O O   | 0.0000 | 19 |
| O   | 4.450005349 | 4.568470112 | 0.914528134 CORE | 20 O O   | 0.0000 | 20 |
| O   | 8.935213801 | 0.400292828 | 1.557898083 CORE | 21 O O   | 0.0000 | 21 |
| O   | 1.580278345 | 4.228544668 | 1.237309672 CORE | 22 O O   | 0.0000 | 22 |
| O   | 2.457544038 | 0.792242747 | 1.163847553 CORE | 23 O O   | 0.0000 | 23 |
| O   | 8.580938495 | 7.209642961 | 1.378764249 CORE | 24 O O   | 0.0000 | 24 |
| O   | 4.742582644 | 0.277955022 | 2.352596113 CORE | 25 O O   | 0.0000 | 25 |
| O   | 3.569476133 | 2.599204215 | 2.802637467 CORE | 26 O O   | 0.0000 | 26 |
| O   | 6.362762194 | 8.225781808 | 2.522375869 CORE | 27 O O   | 0.0000 | 27 |
| O   | 8.597616893 | 8.367001661 | 3.773242146 CORE | 28 O O   | 0.0000 | 28 |
| O   | 2.876018063 | 5.126454657 | 3.387116439 CORE | 29 O O   | 0.0000 | 29 |
| O   | 2.497535476 | 0.460609724 | 3.856426312 CORE | 30 O O   | 0.0000 | 30 |
| O   | 4.269615678 | 7.362517251 | 3.981422893 CORE | 31 O O   | 0.0000 | 31 |
| O   | 1.626856495 | 7.075313087 | 4.504865842 CORE | 32 O O   | 0.0000 | 32 |
| O   | 8.318838136 | 4.412252058 | 4.342500896 CORE | 33 O O   | 0.0000 | 33 |
| O   | 7.057232575 | 2.267383334 | 2.468066967 CORE | 34 O O   | 0.0000 | 34 |
| O   | 3.462674304 | 5.586444707 | 5.842728193 CORE | 35 O O   | 0.0000 | 35 |
| O   | 0.443991875 | 9.072485781 | 6.231141949 CORE | 36 O O   | 0.0000 | 36 |
| O   | 7.045453931 | 9.663337489 | 6.809197261 CORE | 37 O O   | 0.0000 | 37 |
| O   | 7.061159378 | 6.251549498 | 6.411759905 CORE | 38 O O   | 0.0000 | 38 |
| O   | 7.370480748 | 3.012231539 | 7.677450167 CORE | 39 O O   | 0.0000 | 39 |
| O   | 2.444641121 | 7.703981305 | 7.546731133 CORE | 40 O O   | 0.0000 | 40 |
| O   | 2.080735541 | 4.900980156 | 8.185552444 CORE | 41 O O   | 0.0000 | 41 |
| O   | 9.159067951 | 7.224202445 | 8.023826995 CORE | 42 O O   | 0.0000 | 42 |
| O   | 1.051297809 | 9.502561716 | 8.753908347 CORE | 43 O O   | 0.0000 | 43 |
| O   | 4.733289389 | 6.250548989 | 8.295447433 CORE | 44 O O   | 0.0000 | 44 |
| O   | 1.225787980 | 2.674421570 | 9.271705313 CORE | 45 O O   | 0.0000 | 45 |
| O   | 7.007615829 | 6.448077873 | 9.563453683 CORE | 46 O O   | 0.0000 | 46 |
| O   | 8.542394915 | 4.643948979 | 0.127531438 CORE | 47 O O   | 0.0000 | 47 |
| O   | 1.459168075 | 2.443381834 | 6.475399823 CORE | 48 O O   | 0.0000 | 48 |
| H   | 7.758286128 | 1.622322269 | 2.201915992 CORE | 49 H H   | 0.0000 | 49 |
| H   | 7.596345742 | 4.962987349 | 4.687582867 CORE | 50 H H   | 0.0000 | 50 |
| H   | 7.891639091 | 3.677643031 | 3.858094100 CORE | 51 H H   | 0.0000 | 51 |
| H   | 6.266124665 | 1.711386871 | 2.612930101 CORE | 52 H H   | 0.0000 | 52 |
| H   | 8.005232935 | 9.541243646 | 6.596684526 CORE | 53 H H   | 0.0000 | 53 |
| H   | 7.756902168 | 6.668809751 | 6.974906962 CORE | 54 H H   | 0.0000 | 54 |
| H   | 6.554016520 | 3.288756874 | 7.237806780 CORE | 55 H H   | 0.0000 | 55 |
| H   | 7.512942773 | 2.082347468 | 7.399297774 CORE | 56 H H   | 0.0000 | 56 |
| H   | 6.928600373 | 9.146965896 | 7.621434554 CORE | 57 H H   | 0.0000 | 57 |
| H   | 6.287831462 | 6.158315078 | 7.009249689 CORE | 58 H H   | 0.0000 | 58 |
| H   | 1.345103226 | 1.488091242 | 6.285001608 CORE | 59 H H   | 0.0000 | 59 |
| H   | 1.542070794 | 2.469141937 | 7.457498203 CORE | 60 H H   | 0.0000 | 60 |
| end |             |             |                  |          |        |    |
| end |             |             |                  |          |        |    |
